# Supplementary material
Source: publisher figshare collection journal article supplement (https://frontiersin.figshare.com/ndownloader/files/13022663)
Supplement: Supplementary file [file 13022663]

# Yamaguchi, et al. Online Supplemental Information

## Materials and Methods

**Genome sequence completion** Gaps in NGS-generated genomes were filled by RT-PCR and Sanger sequencing for the following 6 samples. Values in Tables 1 and 2 of the main text reflect coverage before addition of these sequences. Those shown below are indicated accordingly: “†Genome completed (100%) with Sanger; ‡ Genome coverage increased with Sanger but still incomplete.” Primers and their sequences are listed below.

| <b>Sample ID</b> | <b>gap positon</b> | <b>gap size</b> | <b>primer pair</b>  |
|------------------|--------------------|-----------------|---------------------|
| PBS1342          | 6643-6649          | 7 bp            | M6577F-JH45R        |
| PBS1342          | 7410-7481          | 72 bp           | M6823F-JH35m        |
| AB260            | 5155-5168          | 14 bp           | Opoli12F-env3R      |
| AB260            | 5322-5324          | 3 bp            | Opoli12F-env3R      |
| AB260            | 5396-5425          | 30 bp           | Opoli12F-env3R      |
| AB260            | 5756-5782          | 27 bp           | Opoli12F-env3R      |
| AB260            | 6685-6717          | 33 bp           | env1F-Oligo dT      |
| AB260            | 7326-7420          | 95 bp           | env1F-Oligo dT      |
| 144-26           | 3511-3545          | 35 bp           | M3345F-M3772R       |
| 144-26           | 3916-3954          | 39 bp           | 55RT3214F-MHApol2R  |
| 144-26           | 6253-6389          | 137 bp          | MN6217F-55EN7052R   |
| 144-26           | 6643-6798          | 156 bp          | MN6217F-55EN7052R   |
| 144-26           | 6977-7432          | 456 bp          | MN6217F-55EN7052R   |
| 5056135          | 6626-6690          | 65 bp           | M6577F-M6895R       |
| 814-43           | 2181-2195          | 15 bp           | gagseq1027F-M2353R  |
| 814-43           | 6649-7342          | 694 bp          | M6577F-JH45R        |
| 363-24           | 3532-3678          | 147 bp          | M3345F-MHApol-6R    |
| 363-24           | 3943-4119          | 177 bp          | M3345F-MHApol-6R    |
| 363-24           | 4263-4275          | 13 bp           | M3345F-MHApol-6R    |
| 363-24           | 5239-5666          | 428 bp          | pol4565F-55TA5518R  |
| 363-24           | 6020-6866          | 847 bp          | M5967F-J6203R       |
| 363-24           | 7129-7474          | 346 bp          | J6265F-JH35m        |
| PBS5635          | 6288-6397          | 109 bp          | CGgapFWD5-CGgapREV5 |
| PBS1189          | 868-1024           | 156 bp          | 5LTRps46f-LPgag6R   |
| PBS1189          | 5349-5412          | 63 bp           | pol4565f-55env272r  |
| PBS1189          | 6246-6752          | 506 bp          | JH09-M6895R         |

|         |           |        |                       |
|---------|-----------|--------|-----------------------|
| PBS1189 | 7081-7123 | 42 bp  | M6874F-JH35m          |
| PBS1189 | 7391-7423 | 32 bp  | M6874F-JH35m          |
|         |           |        |                       |
| 50      | 1013-1294 | 281 bp | 5LTRps44f-Mp24-1r     |
| 50      | 3518-3651 | 133 bp | M3345F-Opol25r        |
| 50      | 5490-5814 | 324 bp | CGgapFWD25-CGgapREV17 |
| 50      | 6120-6786 | 666 bp | CGgapFWD10-CGgapREV10 |
| 50      | 6120-6786 | 666 bp | CGgapFWD10-CGgapREV10 |
| 50      | 7768-7925 | 157 bp | JH35F-IDRps38r        |
| 50      | 8336-8385 | 49 bp  | CGgapFWD11-CGgapREV11 |
| 50      | 8612-8642 | 30 bp  | CGgapFWD12-CGgapREV12 |
|         |           |        |                       |
| 87-2580 | 6754-6829 | 75 bp  | CGgapFWD17-CGgapREV16 |
| 87-2580 | 7115-7315 | 200 bp | CGgapFWD17-CGgapREV16 |
| 87-2580 | 8378-8518 | 140 bp | CGgapFWD4-CGgapREV4   |
|         |           |        |                       |
| 2049    | 3749-3923 | 174 bp | M3345F-rt-inseqR2     |
|         |           |        |                       |
| PBS0724 | 6233-6875 | 642 bp | CGgapFWD13-CGgapREV13 |
| PBS0724 | 7019-7617 | 598 bp | CGgapFWD13-CGgapREV13 |

| Name        | Length | Sequence                      | Location<br>B-HXB2 or O-ANT70 |
|-------------|--------|-------------------------------|-------------------------------|
| 55EN7052R   | 28     | TCCTGCRATGGGAGGGGCATAYATTGCT  | 7520<7547                     |
| 55RT3214F   | 24     | CAGARAGCATARTAATATGGGGAA      | 3679>3702                     |
| 55TA5518R   | 26     | GCTTCTTCCTGCCATAGGAGATGCCT    | 5959<5984                     |
| env1F       | 19     | CCARAGCAGTAAGTAACGC           | 6089>6107 (ANT70)             |
| env3R       | 18     | GTTARCATCTGARGCACA            | 6449<6431 (ANT70)             |
| gagseq1027F | 21     | GCTWCAYTAGAAGAAATGATG         | 1816>1836                     |
| J6203R      | 26     | GGRGCACAATAATGTATRGAATTGG     | 6858<6883                     |
| J6265F      | 29     | AATGTCAGYACAGTACAATGYACACAYGG | 6945>6973                     |
| JH35m       | 21     | CACTTCTCCAATTGTCCITCA         | 7648<7668                     |
| JH45R       | 22     | CARTAGAAAAATTCTCCTCYAC        | 7357<7378                     |
| M2353R      | 25     | TCTAATACTGTATCATCTGCTCCTG     | 2329<2353                     |
| M3345F      | 23     | TGGGCAAGTCAGATTTATCCAGG       | 3345>3367                     |
| M3772R      | 22     | GCTTGCCAATAGTCTGTCCACC        | 3751<3772                     |
| M5967F      | 21     | CCTATGGCAGGAAGAAGCGGA         | 5967>5987                     |
| M6577F      | 25     | CATGTGTAAAGTTAACCCWCTCTG      | 6577>6601                     |
| M6823F      | 24     | CCATTAAACAGGCTTGTCCAAAGG      | 6823>6846                     |
| M6895R      | 22     | GCAAAACCAGCTGGRGCACAAT        | 6874<6895                     |
| MHApol-2R   | 26     | TGCCATATYCCTGGACTRCAGTCTAC    | 4389<4414                     |
| MHApol-6R   | 26     | TTTGCTACTATAGGTGGCAGATTAAA    | 4305<4330                     |
| MN6217F     | 28     | GAAAGAGCAGAAGACAGTGGCAATGAG   | 6203>6229                     |

|            |    |                                |                   |
|------------|----|--------------------------------|-------------------|
| Opoli12F   | 21 | AGGGAGCAGTAGTCATACAAG          | 5021>5041 (ANT70) |
| pol4565F   | 24 | TATGGAAAACAGATGGCAGGTGAT       | 5040>5063         |
| 55env272r  | 24 | TCTGGGGCTTGTTCCATCTATCTT       | 5552<5575         |
| 5LTRps44f  | 20 | AGGCCAGGGGGAAAGAAAAG           | 853>872           |
| 5LTRps46f  | 20 | GCTAGAAGGAGAGAGATGGG           | 775>794           |
| CGgapFWD10 | 18 | GGAACCAGCCAGGAAGTC             | 5862>5879         |
| CGgapFWD11 | 21 | ACCTGGCTGCAATGGGACAAA          | 8103>8123         |
| CGgapFWD12 | 20 | AGCCTGTGGACTTGTTTGA            | 8226>8245         |
| CGgapFWD13 | 22 | AAGCGGAAACGACGACGAAAAA         | 5981>6002         |
| CGgapFWD17 | 24 | ACCCCAACCCACAAGAGATAACTA       | 6457>6479         |
| CGgapFWD25 | 26 | AGCAACAGACATACAACTAAAGAAC      | 4841>4866         |
| CGgapFWD4  | 18 | CTAATGTGCCTTGGAACG             | 8041>8058         |
| CGgapFWD5  | 24 | TGCTCCTTGGAATGTTGATGACCT       | 6283>6306         |
| CGgapREV10 | 24 | ATTTAGCAGCAGTTGAGTTGATAC       | 6987<7010         |
| CGgapREV11 | 17 | CTCTCAAGCGGTGGTAG              | 8525<8541         |
| CGgapREV12 | 22 | TCCTTTCTGCGCCCTGTCTGAT         | 8763<8784         |
| CGgapREV13 | 21 | CCCAAGAACCCAAGGAACACA          | 7775<7795         |
| CGgapREV16 | 24 | CCACTCTCTGCCACATTCTCACAA       | 7492<7515         |
| CGgapREV17 | 22 | TCTCCGCTTCTTCCTGCCATAG         | 5968<5989         |
| CGgapREV4  | 19 | GCTACTGCTATTGCTGTGG            | 8674<8692         |
| CGgapREV5  | 24 | CAGCAGCAGTTGAGTTGACACCAC       | 6984<7007         |
| IDRps38r   | 22 | TTCTTTTCTTGCTGGTTCTGCG         | 8170<8191         |
| JH09       | 30 | TTAGGCATNTCCTATGGCAGGAAGAAGCGG | 5957>5986         |
| JH35F      | 22 | TGARGGACAATTGGAGAARTGA         | 7648>7669         |
| LPgag6R    | 24 | AACATGGGTATTACTTCTGGGCTG       | 1281<1304         |
| M6874F     | 22 | ATTGTGCYCCAGCTGGTTTTGC         | 6874>6895         |
| Mp24-1r    | 20 | TCTCCYACTGGRAYAGGTGG           | 1549<1568         |
| Opol25r    | 20 | CATTCWGAATCCAGGTGGC            | 3771<3790         |
| rt-inseqR2 | 26 | GAAGTAAAYATAGTAACAGACYCACA     | 4023<4048         |

## Supplemental Figure Legends

**Supplemental Figure S1. Phylogenetic analysis of incomplete genomes.** Individual neighbor joining phylogenetic trees of 7 new strains (red) with 75-90% genome coverage. Resulting length of alignment following gap-stripping is indicated for each.

**Supplemental Figure S2. Phylogenetic analysis of incomplete genomes.** Individual neighbor joining phylogenetic trees of 8 new strains (red) with <75% genome coverage. Resulting length of alignment following gap-stripping is indicated for each.

## Supplemental Table Legends

**Supplemental Table S1. HIV-xGen probes.** Probe IDs and sequences (n=652) are listed along with genomic coordinates relative to consensus group reference or individual subtype consensus sequences.

**Supplemental Table S2A.** The consensus sequence identity was compared for 5 HIV-SMART datasets from Table 1 with matched xGen results. Exact PCR duplicates were removed from each dataset and a sequence identity matrix was performed. Total mapped reads and percent identity values between resulting consensus sequences are reported.

**Supplemental Table S2B.** Minor variant (MV) analysis was performed on the same 5 HIV-SMART datasets in **Table S2A**, once again with exact PCR duplicates removed from SMART and SMART-xGen datasets. Percent genome coverage and total MV >10% detected are listed. The datasets were then compared to each other over shared regions of coverage to determine the overlap in exact MV detected (e.g. sample genomic coordinate). Each cell lists the number of identical MV, followed by the percentage of this overlap relative to each dataset.

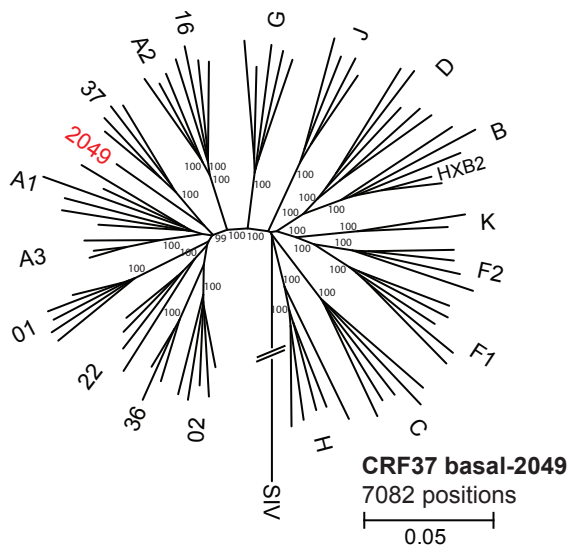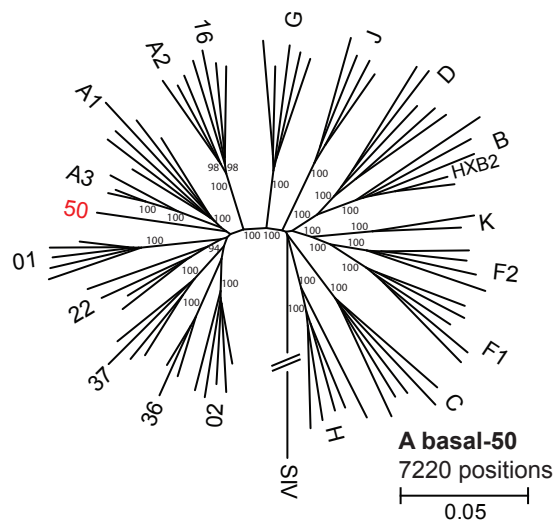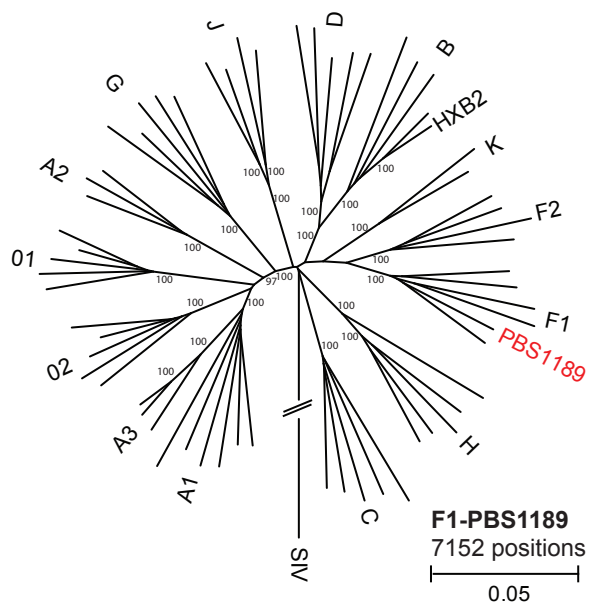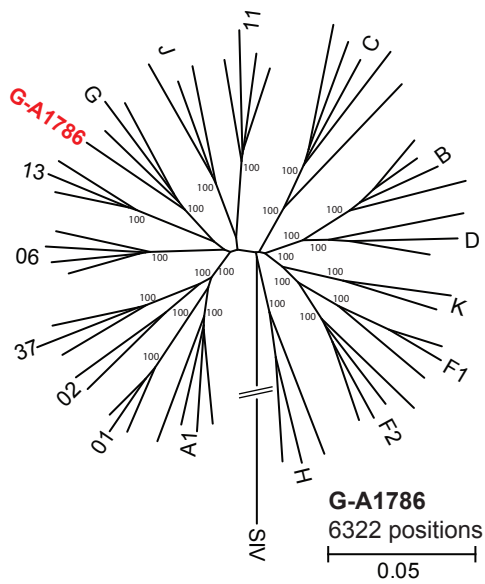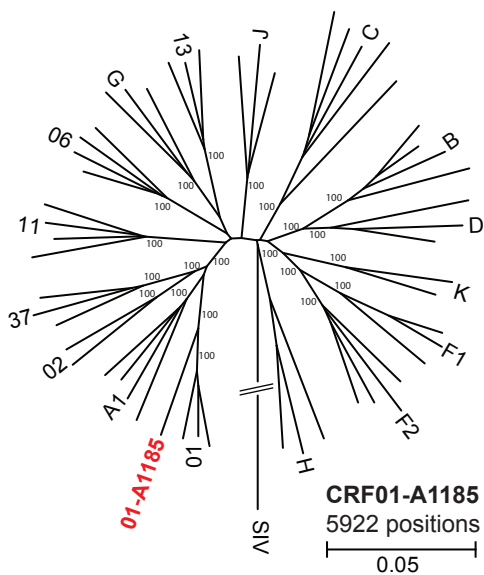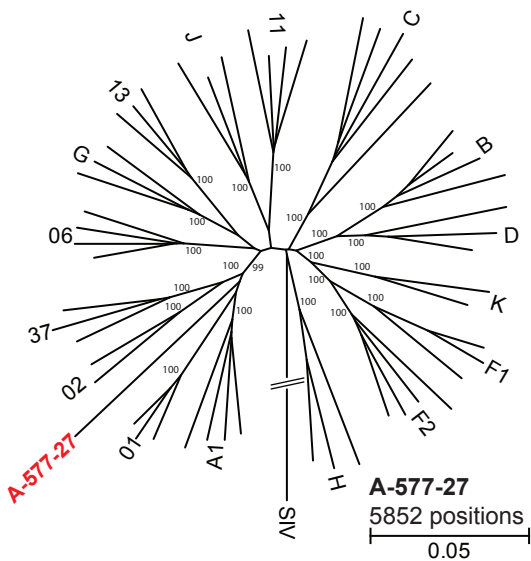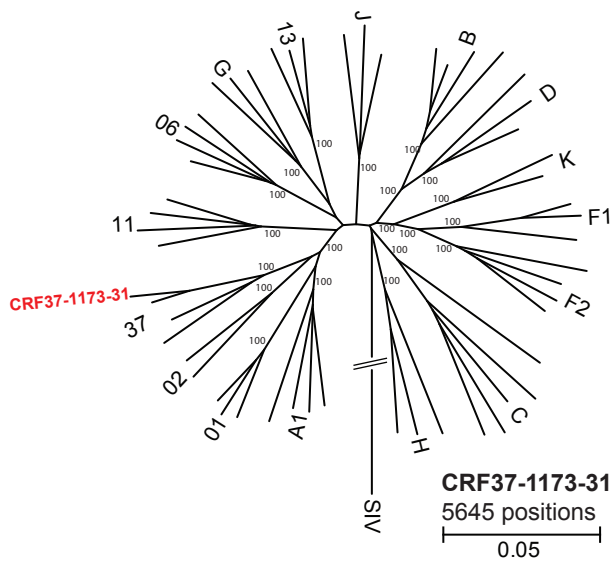

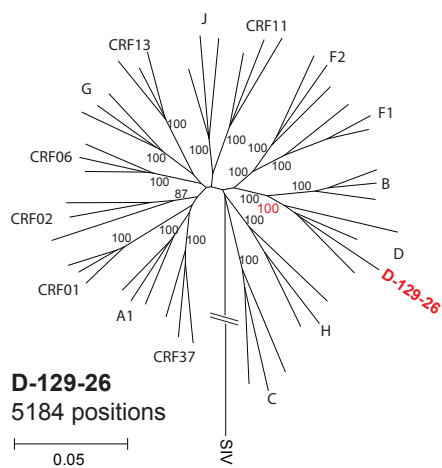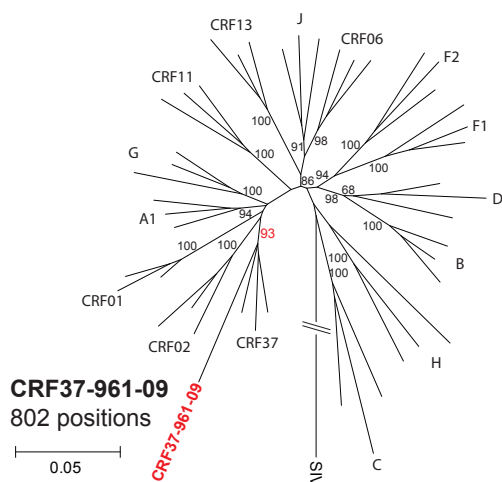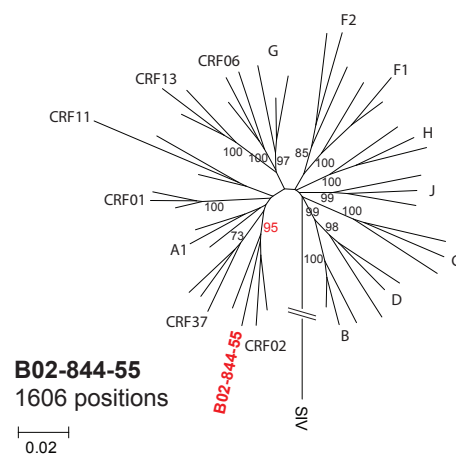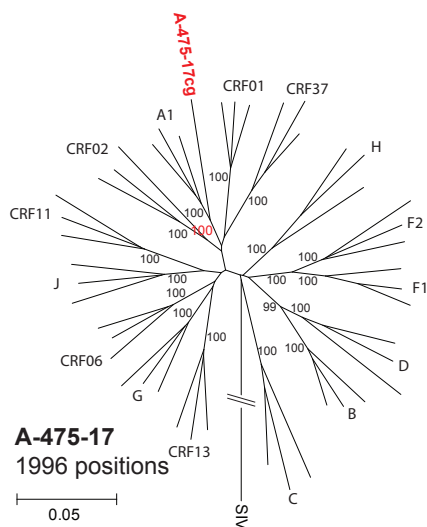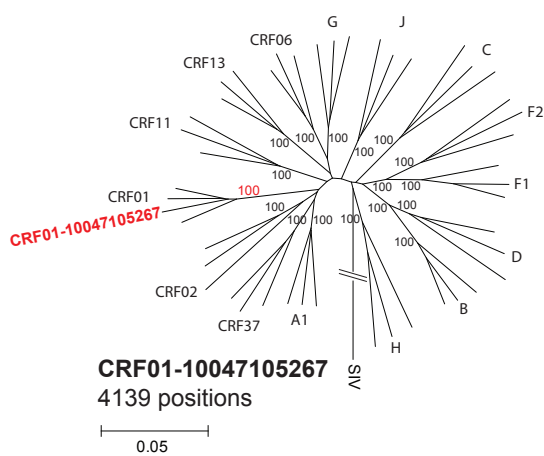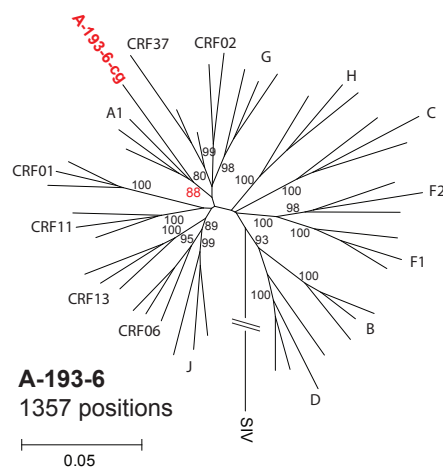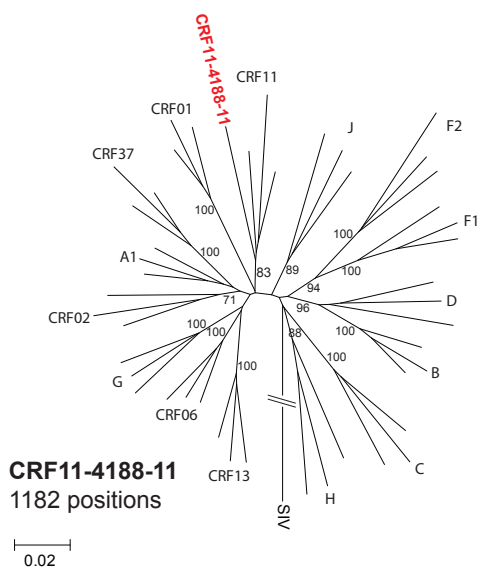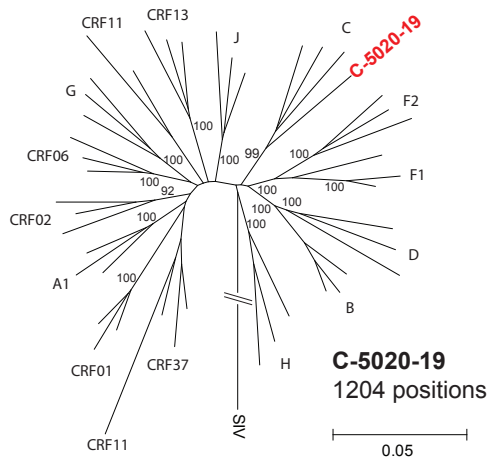

# Supplemental Table S1. HIV-xGen Probes

| SequenceName                   | Start | Stop | Sequence                                                                                                                       |
|--------------------------------|-------|------|--------------------------------------------------------------------------------------------------------------------------------|
| 176861_8776076_HIV1-Con_M_1_1  | 0     | 120  | TGGAGAGGCTAATTTACTCCCAGAAAAGACAAGAGATCCTTGATCTGTGGGTCTACCAACACAAGGCTACTTCCCTGATTGGCAGAACTACACACAGGCGCCAGGGATCAGATATCCAC        |
| 176861_8776076_HIV1-Con_M_1_2  | 119   | 239  | CTGACCTTTGGATGGTGTCTCAAGCTAGTACCAGTTGACCCAGAGGAGATAGAAAGAGCCAAATGAAGGAGAGAACAACCTGCTTGTACACCCATATGAGCCAGCATGGAATGGATGACCCG     |
| 176861_8776076_HIV1-Con_M_1_3  | 238   | 358  | GGAGAAAGAAGTGTATGTGTGGAAGTTTGACAGCCGCCTAGCATTTCATCAGATGGCCCCAGAGAGCTGCATCCGGAGTACTACAAAGACTGCTGACATCGAGCTTTCTACAAGGGACTTTT     |
| 176861_8776076_HIV1-Con_M_1_4  | 357   | 477  | CCGCTGGGGACTTTCCAGGGGAGCGGTGGCCTGGGCGGGACTGGGGAGTGGCTAACCCCTCAGATGCTGCATATAAGCAGCTGCTTTTTCGCTGTACTGGGTCTCTCTGGTTAGACAGAT       |
| 176861_8776076_HIV1-Con_M_1_5  | 476   | 596  | TCTGAGCCTGGGAGCTCTCTGGCTAGTAGGGGAACCCACTGCTTTAAGCCCTCAATAAAGCTTGCCTTGAGTGCTTCAAGTAGTGTGTGCCCTCTGTTGTGTGACTCTGGTAACCTAGAGAT     |
| 176861_8776076_HIV1-Con_M_1_6  | 595   | 715  | TCCCTCAGACCCCTTTTAGTCAGTGTGAAAAATCTCTAGCAGTGGCGCCCCAACAGGGACTTGAAGCGCAAAGTAAACCAGAGAGAAGATCTCTCGACGCAGGACTCGGCTTGTGGAAGTGC     |
| 176861_8776076_HIV1-Con_M_1_7  | 714   | 834  | CACACGGCAAGAGGCGAGAGGCGGCGACTGGTGAGTACGCCAAATTTTGTACTAGCGGAGGCTAGAAGGAGAGAGATGGGTGCGAGAGCGCTCAGTATTAAGCGGGGGAAAAATAGATGCA      |
| 176861_8776076_HIV1-Con_M_1_8  | 833   | 953  | ATGGGAAAAAATTCGGTTAAGGCCAGGGGGAAAGAAAAATATAGACTAAAACATCTAGTATGGCGAAGCAGGGAGCTGGAAGAGATTGCACTTAACCCCTGGCCTTTTAGAAACATCAGA       |
| 176861_8776076_HIV1-Con_M_1_9  | 952   | 1072 | AAGGCTGTAACAAAAATATAGGACAGCTACAACAGCTCTTCAGACAGGATCAGAGAAGAACTTAGATCATTATATAATACAGTAGCAACCCCTCTATTGTGTACATCAAAGGATAGAGGTAA     |
| 176861_8776076_HIV1-Con_M_1_10 | 1071  | 1191 | AAAGACACCAAGGAAGCTTTTAGATAAGATAGAGGAAGAAACAAAACAAAGTCAGCAAAAAACACAGCAAGCAGCAGCTGCACAAAGGAAACAGCAGCCAGGTGAGTCAAAATACCCCTATA     |
| 176861_8776076_HIV1-Con_M_1_11 | 1190  | 1310 | AGTGCGAATCTACAAGGGCAAAATGGTACACCCAGGCCATATCACCTAGAAGCTTTAAATGCATGGGTAAAAGTAATAGAAAGAGAAGGCTTTTACGCCAGAAAGTAATACCCATGTTTTCAGC   |
| 176861_8776076_HIV1-Con_M_1_12 | 1309  | 1429 | CATTATCAGAAAGGAGCCGCCACAAAGATTAAACACCATGCTAAACACAGTGGGGGACATCAGAGCAGCATGCAAAATGTTAAAAGATACCATCAATGAGGAAGCTGCAAGATGGGACA        |
| 176861_8776076_HIV1-Con_M_1_13 | 1428  | 1548 | AGGTTTACATCCAGTGCATGACAGGCGCTATTGCAACAGGCCAGATGAGAGAAACCAAGGGGAAGTGATATAGCAGGAACTACTAGTACCCCTTCAGGAACAATAAGCATGGATGACAAGCAAC   |
| 176861_8776076_HIV1-Con_M_1_14 | 1547  | 1667 | CCCACCTATCCCAGTGGGAGAAATCTATAAAAGATGGATAATCCTGGGATTAAATAAAATAGTAAGAAATGTATAGCCCTGTCAGCATTTTGGACATAGACAAGGGGCCAAAAGAACCCCTT     |
| 176861_8776076_HIV1-Con_M_1_15 | 1666  | 1786 | TTAGAGACTATGTAGACAGGTTCTTTAAAACTCTAAGAGCTGAGCAAGCTACACAGGAAGTAAAAAATTTGGATGACAGACACCTTGTGTGTCCTCAAAATGCGAACCCAGATTTGTAAGACCA   |
| 176861_8776076_HIV1-Con_M_1_16 | 1785  | 1905 | ATTTTAAAAAGCATTAGGACCCAGGGGCTACACTAGAAAGAAATGATGACAGCATGTGAGGAGTGGGAGGACCCGGCCATAAAGCAAGAGTTTGTGCTGAGGCAATGAGCCAAGCAACAAAT     |
| 176861_8776076_HIV1-Con_M_1_17 | 1904  | 2024 | TACAGCTACCATAATGATGACAGAGAGCAATTTTAAAGGCCAAAGAAGAATTGTTAAGTGTTCCTTCTGAGCAAGGAGACACATAGCCAGAAATTTGAGGGCCCTTAGGAAAAAGGG          |
| 176861_8776076_HIV1-Con_M_1_18 | 2023  | 2143 | GCTGTTGGAATGTGGAAGGAAGACACCAAATGAAAGACTGCACTGAGAGACAGGCTAATTTTGGGAAAAATTTGGCCTTCCAACAAAGGGAGGCCAGGGAAATTTCTTCAGAGCA            |
| 176861_8776076_HIV1-Con_M_1_19 | 2142  | 2262 | AGACCAGAGCCAACAGCCCCACCAGCAGAGAGCTTCGGGTTTCGGGGAGGAGATAAACCCTCTCCGAGCAGGAGCAGAAAGACAAGGAACCTGTATCCCTTAACCTCCCTCAAACTCACTC      |
| 176861_8776076_HIV1-Con_M_1_20 | 2261  | 2381 | CTTTGGCAACGAGCCCTTGTCAATAAAAAATAGGGGACAGCTAAAGGAAGCTCTATTAGATACAGGAGATGATACAGTATTAGAAGACATAAAATTTGCCAGGAAAGTGAAGAACCA          |
| 176861_8776076_HIV1-Con_M_1_21 | 2380  | 2500 | AAAAATGATAGGGGAATTTGGAGGTTTTATCAAAGTAAGACAGTATGATCAAACTACTCATAGAAATTTTGGGAAAAAGGCTATAGGTACAGTATTAGTAGGACCTACACCTGTCAACAT       |
| 176861_8776076_HIV1-Con_M_1_22 | 2499  | 2619 | TAATTTGGAAGAAATATGTTGACTCAGATTGGTTGCACCTTTAAATTTTCCAATTAGTCCTATTGAACTGTACCCAGTAAATTAAGGCAGGAATGGATGGCCCAAGGTTTAAACATGGC        |
| 176861_8776076_HIV1-Con_M_1_23 | 2618  | 2738 | CCATTGACAGAAGAAAAATAAAAGCATTAAACAGAAATTTGTACAGAAATGGAAGGAAGGAAAAATTTCAAAATTTGGGCCCTGAAATCCATACAATACTCCAGTATTTGCCATAAAG         |
| 176861_8776076_HIV1-Con_M_1_24 | 2737  | 2857 | GAAAAAAGACAGTAAATTAAGGAGAAATTAGTAGATTTTCAGAGAACTTAAATAAAGAACTTCAAGACTTCTGGGAAGTTCAATTAGGAATACCCATCCAGCAGGGTTAAAGAAAGGAAAA      |
| 176861_8776076_HIV1-Con_M_1_25 | 2856  | 2976 | AATCAGTAACAGTACTGGATGTGGGGATGCATATTTTTCAGTTCCTTAGTAGTAAGACTTCAGGAAGTATACTGCATTCACCATACCTAGTATAAACAATGAGACACCAGGGATTAGAT        |
| 176861_8776076_HIV1-Con_M_1_26 | 2975  | 3095 | TATCAGTACAATGTGCTTCCACAGGGATGGAAGAGATCACCAGCAATATTCCAAAGTAGCATGACAAAAATCTTAGAGCCCTTTAGAAACAAAAAATCCAGAAATAGTTATCTATCAATAC      |
| 176861_8776076_HIV1-Con_M_1_27 | 3094  | 3214 | CATGGATGATTTGTATGTAGGATCTGACTTAGAAATAGGGCAGCATAGAGCAAAAAATAGAGGAGTTAAGAGAACATCTATTGGAAGTGGGGATTTACCACACCAGACAAAAAACATCAGAA     |
| 176861_8776076_HIV1-Con_M_1_28 | 3213  | 3333 | AAGAACCTCCATTCTTTTGGATGGGGTATGAACCTCCTTCGACAAATGGACAGTACAGCCTATACAGCTGCCAGAAAGGACAGCTGGAGCTGTCAATGATATACAGAAAGTTAGTGGGAA       |
| 176861_8776076_HIV1-Con_M_1_29 | 3332  | 3452 | AAATTAATTTGGGCAAGTCAGATTTATCCAGGGATTAAAGTAAAGCAATTATGTAACTCCTTAGGGGAGCCAAAGCACTAACAGACATAGTACCAGTACTGAGAAAGCAGAAATTAGAA        |
| 176861_8776076_HIV1-Con_M_1_30 | 3451  | 3571 | ATTGGCAGAGAACAGGGAATTTCTAAAGAAACAGGTACATGGAGTATATTATGACCCATCAAAAGACTTAATAGCAGAAATACAGAAACAAGGGCAAGACCAATGGACATATCAAAATTTA      |
| 176861_8776076_HIV1-Con_M_1_31 | 3570  | 3690 | ATCAAGAGCCATTTAAAAATCTGAAAACAGGAAGTATGCAAAAATGAGGTCTGCCACACTAATGATGTAACAACTTAACAGAGGCAGTGCAAAAAATAGCCACAGAAAGCATAGTAA          |
| 176861_8776076_HIV1-Con_M_1_32 | 3689  | 3809 | ATATGGGGAAAGACTCCTAAATTTAGACTACCCATACAAAAAGAAACATGGGAAACATGGTGGACAGAGTATTGGCAAGCCACCTGGATTCTCTGAGTGGGAGTTTGTCAATACCCCTCTCT     |
| 176861_8776076_HIV1-Con_M_1_33 | 3808  | 3928 | TCTAGTAAATTTATGTTACAGTTAGAAAAAGAACCCATAGTAGGAGCAGAAACTTTCTATGTAGATGGGGCAGCTAATAGGGAGACTAAAATAGGAAAAGCAGGATATGTTACTGACAG        |
| 176861_8776076_HIV1-Con_M_1_34 | 3927  | 4047 | GAGGAAGACAAAAAGTTGTCTCCCTAACTGAAACAACAAATCAGAAGACTGAATTACAAGCAATTCACTAGCTTTGACAGGATTGAGGATCAGAAGTAAACATAGTAAACAGACTCACAGT      |
| 176861_8776076_HIV1-Con_M_1_35 | 4046  | 4166 | TATGCATTAGGAATCATTCACGACACACAGATAAGAGTGAATCAGAGTTAGTCAATCAATTAATAGAGCAGTTAATAAAAAAGGAAAAGGCTACCTGTGTCATGGGTACCAAGCACAAAA       |
| 176861_8776076_HIV1-Con_M_1_36 | 4165  | 4285 | AGGAATTTGGAGGAAATGAAGAAAGTAGATAAATTAGTCAGTACTGGAATGACAAATGGAGACTCAATTTTATAGTGGAAATAGATAAGGCTCAAGAAAGAACATGAAAAATATCAGCAATTTGAG |
| 176861_8776076_HIV1-Con_M_1_37 | 4284  | 4404 | GAGCAATGGCTAGTGATTTTAACTGACCCTGTAGTAGCAAAAGAAATAGTAGCTAGCTGTGATAAATGTGACGTAAAGGGGAAGCCATGCATGGACAAAGTAGACTGTAGTCCAGGAA         |
| 176861_8776076_HIV1-Con_M_1_38 | 4403  | 4523 | ATATGGCAATTAGATTGTACACATTTTGAAGGAAAAAATATCCTGGTAGCAGTCCATGTAGCCAGTGGCTATATAGAAGCAGAAAGTTATCCCAGCAGAAACAGGACAGGAAACAGCATAC      |
| 176861_8776076_HIV1-Con_M_1_39 | 4522  | 4642 | CTTTATATTAATAATTAAGCAGGAAGATGGCCAGTAAAGAGTAATACATACAGACAAATGGCAGCAATTTGTGTGGCAGGTAGACAGGATGAGGAGGAGTAAAGGAGGATCAACAGGAATT      |
| 176861_8776076_HIV1-Con_M_1_40 | 4641  | 4761 | TTGGAATTCCTACAATCCCCAAAGTCAAGGAGTAGTAGAATCTATGAATAAAGAAATTAAGAAAAATCATAGGACAGGTAAGAGATCAAGCTGAACATCTTAAGACAGCAGTACAAATGG       |
| 176861_8776076_HIV1-Con_M_1_41 | 4760  | 4880 | GCAGTATTTCATTCACAATTTTAAAGAAAGGGGGGATTGGGGGTCAGGTGCAGGGGAAAGAAATAATAGACATAATAGCAACAGACATACAACTTAAAGAAATACAAAAACAATTTACA        |
| 176861_8776076_HIV1-Con_M_1_42 | 4879  | 4999 | AAAAATTCAAAAATTTTCGGGTTTATTACAGGGACAGCAGAGACCCAAATTTGGAAGGACCAGCAAACTACTCTGGAAGGTTGAAGGGGCAGTAGTAATAACAAGACAAATAGTGAAATAAA     |
| 176861_8776076_HIV1-Con_M_1_43 | 4998  | 5118 | AGGTATTACCAAGAAAGAAAGCAAGATCATTAGGAGATTATGGAACACAGATGGCAGGTGATGTTGTGTGGCAGGTAGACAGGATGAGGAAACAGGATGGAACATGGAAGGCTAGTAAAGCAC    |
| 176861_8776076_HIV1-Con_M_1_44 | 5117  | 5237 | CCATATGTATGTTTCAAAGAAAGCTAAAGGATGGTTTTATAGACATCACTATGAAGCAGGCATCCAAAAATAAGTTCAGAAGTACACATCCCACTAGGGGATGCTAGATTAGTAGTAAC        |
| 176861_8776076_HIV1-Con_M_1_45 | 5236  | 5356 | CAACATATTGGGCTGTGCATACAGGAGAAAGAGACTGCAATTTGGGTGAGGAGTCTCCATAGAAATGGAGGCAGAGAAGATATAGCACACAAGTAGACCTTGGCTGGCAGACCAACTAA        |
| 176861_8776076_HIV1-Con_M_1_46 | 5355  | 5475 | ATTCATATGTATTATTTTGATTGTTTTTCAGAATCTGCCATAAGGAAAGCCATATTAGGACATATAGTTAGTCTTAGGTGTGAATATCAAGCAGGACATAACAAGGTAGGATCTCTACAA       |
| 176861_8776076_HIV1-Con_M_1_47 | 5474  | 5594 | ATATTGTGCACTAACAAAGATTAATAACACCAAAAGACTTAAAGCCCTTGTGCTTAGTGAAGACTAGCAGAGGATAGATGGAAACAGGATGAGGAAACAGGCTAGGAGGCTAGAGAGGAG       |
| 176861_8776076_HIV1-Con_M_1_48 | 5593  | 5713 | GCCATACAATGAATGGACACTAGAGCTTTTAGAGGAGCTTAAGAATGAAGCTGTAGACATTTTCCTAGGCCATGGCTCCATGGCTTAGGACAACATATCTATAACACCTATGGGGATAC        |
| 176861_8776076_HIV1-Con_M_1_49 | 5712  | 5832 | CTTGGGAAGGAGTTGAAGCTATAATAAGAATACTGCAACAACTACTGTTTATTCATTTTCAGAAATTTGGTGGCCAGATAGCAGAAATAGGCATTATTTCGACAGAGAGAGTAAGAATGGAG     |

|                                        |      |      |                                                                                                                              |
|----------------------------------------|------|------|------------------------------------------------------------------------------------------------------------------------------|
| 176861_8776076_HIV1-Con_M_1_50         | 5831 | 5951 | GCCAGTAGATCCTAACCTAGAGCCCTGGAACCATCCAGGAAGTCAGCCTAAAACCTGCTTGTAAACAAATGTTATTGTAAAAAGTGTGCTATCATTTGCCAAGTTTGTCTTTATAAAGAAAGG  |
| 176861_8776076_HIV1-Con_M_1_51         | 5950 | 6070 | GCTTAGGCATCTCCTATGGCAGGAAGAGCGGAGACAGCGACGAGAAAGACTCCCTCAAAGCAGCTCAGGATCATCAAAATCCTATACCAAGCAGCTAAGTAGTATATGTAAATGCAACCTTTAG |
| 176861_8776076_HIV1-Con_M_1_52         | 6069 | 6189 | GAAATATTAGCAATAGTAGCATTTAATAGTAGCACTAATAATAGCAATAGTTGTGTGGACCATGATGTATAGAAATATAGGAAATATAGGAAACAAAGAAATATAGACAGATTAATGAA      |
| 176861_8776076_HIV1-Con_M_1_53         | 6188 | 6308 | AAGAATAAGAGAAAGAGCAGAAGACAGTGGCAATGAGAGTGAGGGGGATACAGAGGAATTTGTCAACACTTTGTGGAAATGGGGCATCTTGCTCCTTGGGATGTTAATGATCTGTAGTGTCTG  |
| 176861_8776076_HIV1-Con_M_1_54         | 6307 | 6427 | GCAGAAAACCTTGTGGGTACAGTCTATTATGTGGGTACCTGTGTGGAAAGAAAGCAACACCACTCTATTTTGTGTCATCAGATGCTAAAGCATATGAAACAGAAGTACATAATGTCTGGGCT   |
| 176861_8776076_HIV1-Con_M_1_55         | 6426 | 6546 | TACACATGCCTGTGTACCCACAGACCCCAACCCACAAGAAATAGTTCTGTGAAAATGTAAACAGAAAATTTTAAACATGTGGAAAAATACATGGTAGAACAGATGCATGAAGATATAATCAG   |
| 176861_8776076_HIV1-Con_M_1_56         | 6545 | 6665 | GTTTATGGGATCAAGCCCTAAAGCCATGTGTAAGGTTAACCCCACTCTGTGTTACTTTAAACTGTACTGATGTTAATAATACTAATAATACTAATAATAATAATGGGAGAATGATGGAAG     |
| 176861_8776076_HIV1-Con_M_1_57         | 6664 | 6784 | GAGAAAGAAAGAAATAAAAAAGTCTCTTTCAATATAACCACAGAAATAAGAGATAAGAAAGAAAGAAATATGCACCTTTTTTATAGACTTGATATAGTACCAATTAATAATAATAATAAT     |
| 176861_8776076_HIV1-Con_M_1_58         | 6783 | 6903 | TAATAGTAATTTATAGGTTAATAAAATGTAAATACCTCAGCCATTACACAGGCTTGTCCAAAGGTATCCTTTGAGCCAAATTCCCATACATTATTGTGCTCCAGCTGGTTTTGCGATTCTAAA  |
| 176861_8776076_HIV1-Con_M_1_59         | 6902 | 7022 | AGTGTAAATGATAAGAAGTTCAATGGAACAGGACCATTGCAAAAATGTGAGCACAGTACAATGTACACATGGAATTAAGCCAGTGGTATCAACTCAACTGCTGTTAAATGGCAGTCTAGCAG   |
| 176861_8776076_HIV1-Con_M_1_60         | 7021 | 7141 | GAGAAGAGATAATAATTAGATCTGAAAATATCACAGACAATGCCAAAACCATAATAGTACAGCTTAATGAATCTGTAGAAATTAATGTACAAGACCCAACAACATACAAGAAAAAGT        |
| 176861_8776076_HIV1-Con_M_1_61         | 7140 | 7260 | TATACGTATAGGACCAGGACAAGCATTTCTATGCAACAGGTGAAATAATAGGAGATATAAGACAAGCACATTGTAACATTAGTGGAAACAAAATGGAATAAACTTTACAACAGGTAGCTAA    |
| 176861_8776076_HIV1-Con_M_1_62         | 7259 | 7379 | AAAAATTAAAGAGACACTTTAATAATAAAAACAATATCTTTAAACCATTCTCAGGAGGGGACCTAGAAATTAACAACACATAGTTTAAATTTGGTGAGGAGAATTTTTCTACTGCAATACAT   |
| 176861_8776076_HIV1-Con_M_1_63         | 7378 | 7498 | TCAGGACTGTTTAAATAGTACATGGAATAATAATAGTAGTACTGAAGGGTCAATAACAGTAAAACAAGTACACTATCACACTCCCATGCAGAATAAAAAAAATATAAACATGTGGCAG       |
| 176861_8776076_HIV1-Con_M_1_64         | 7497 | 7617 | GAGATAGGACAAGCAATGTTATGAGGATTTGGGGCTGCCATTGCAGGAAAAATTCAGAGTCAAAATGACCAAGTACTAATGACAAGAGATGGTGGTAAATAATAATAATAGATGAGACTT     |
| 176861_8776076_HIV1-Con_M_1_65         | 7616 | 7736 | TCAGACCTGGAGGAGGAGATATGAGGGACAATTGGAGAAGTGAATTATATAAATAATAAAGTAGTAAAAATTAAGACCATTAGGAGTAGCACCCCAAGGCAAGAGAGAGTGGTGGAGA       |
| 176861_8776076_HIV1-Con_M_1_66         | 7735 | 7855 | AGAGAAAAAAGAGCAGTGGGAATAGGAGCTGTGTTCTTGGGTTCTTGGGAGCAGCAGGAAGCACTATGGGCGCAGCGTCAATAACGCTGACGGTACAGGCCAGACAATTTATTGTCTGGT     |
| 176861_8776076_HIV1-Con_M_1_67         | 7854 | 7974 | TATAGTGCAACAGCAAAGCAATTTGCTGAGGGCTATAGAGGGCGCAACAGCATCTGTTGCAACTCACAGTCTGGGGCATTAAACAGCTCCAGGCAAGAGTCTGGCTGTGGAAAGATACCT     |
| 176861_8776076_HIV1-Con_M_1_68         | 7973 | 8093 | TAAAGGATCAACAGCTCCTAGGGATTTGGGGCTGCTCTGGAATACTCATCTGCACCACTAATGTGCCCTGGAACTCTAGTTGGAGTAAATAATCTCAGGATGAGAAATTTGGGATAACATGA   |
| 176861_8776076_HIV1-Con_M_1_69         | 8092 | 8212 | ACCTGGATGCAGTGGGAAAGAGAAATTAACAATTACACAGACATAATATACAGCTTAATTTGAAGAATCGCAAAACCAGCAGGAAAAGAAATGAACAAGAATTTATGGCATTGGACAAGTGG   |
| 176861_8776076_HIV1-Con_M_1_70         | 8211 | 8331 | GGCAAGTCTGTGGAATTGGTTTGACATAACAAATTTGGCTGTGGTATATAAAAAATTTTCAATATGATAGTAGGAGGCTTGATAGGTTTAAAGAATAGTTTTTGTCTGTCTTTCTATAGTAAA  |
| 176861_8776076_HIV1-Con_M_1_71         | 8330 | 8450 | ATAGAGTTAGGCGGGATACTACCTTTTGTCATTTTCAGACCCCTTATCCCAACCCGAGGGGACCCGACAGGCCCGAAGGAATCGAAGAAGAAGGTGGAGAGCAAGACAGACAGATCCA       |
| 176861_8776076_HIV1-Con_M_1_72         | 8449 | 8569 | ATTCGATTAGTGAACGGATTTCTAGCACTTTGCTCGGGACGACTGCGGAGCCTGTGCTCTTTAGCTTACCACCGCTTGAGAGACTTCATCTTGATTGCGAGCGAGGACTGTGGAACCTCTG    |
| 176861_8776076_HIV1-Con_M_1_73         | 8568 | 8688 | GGGACGCAGCAGTCTCAAGGGACTGCGAAGGGGGTGGGAAGCCCTCAAAATATCTGTGGAATCTCCTGCAGTATTGGGGTCAGGAACATAAGAAATAGTGCTATTAGTTTGCTTGATACCAC   |
| 176861_8776076_HIV1-Con_M_1_74         | 8687 | 8807 | CAGCAATAGCAGTAGCTGAGGGGACAGATAGGGTTATAGAAGTAGTACAAGAGCTTTGAGAGCTATTCTCAACATACCTAGAAGAATAAGACAGGGCTTTGAAAGGGCTTTGCTATATAA     |
| 176861_8776076_HIV1-Con_M_1_75         | 8806 | 8926 | AATGGGTGGCAAGTGGTCAAAAAGTAGTATAGTTGAGTGGCCTGCTGTGAAGGAAAGATAGACGAACTGCTCCAGCAGCAGAGGGGTAGGAGCAGTATCTCAAGACTTAGATAAACA        |
| 176861_8776076_HIV1-Con_M_1_76         | 8925 | 9045 | TAGGGGCAATCAACAGCAGAATAACAGCAGCTACTAATGCTGACTGTGCTGCTGGCTGGGAAGCACAAGAGGAGGAGGAAGTAGGCTTCCAGTCAGACCTTCAGGTTCTTAAAGACCAATGA   |
| 176861_8776076_HIV1-Con_M_1_77         | 9044 | 9164 | ACTTATAAGGCAGCTTTTGATCTCAGCCACTTTTTTAAAAGAAAAGGGGGGACTTGAAGGGTTAATTTACTCCAAGAAAAGACAAGAGATCCTTGATCTGTGGGTCTACCACACACAAGGC    |
| 176861_8776076_HIV1-Con_M_1_78         | 9163 | 9283 | CTACTCTCCCTGATTGCGAGAATACACACAGGGCCAGGGATCAGATACCCACTGACCTTTGGATGTGTCTTCAAGCTAGTAGACAGTTGATCCAGAGGAGGTAGAAGAGGCCAATGAAGG     |
| 176861_8776076_HIV1-Con_M_1_79         | 9282 | 9402 | GAGAGACAACACTCGTGTGTACCCATGAGCCAGCATGGAATGGAGGATGAAGAGCAGAGAAGTGTAAATGTGGAAAGTTTGACAGCCGCTAGCATGAGACATACAGCCCGAGAGCTGTC      |
| 176861_8776076_HIV1-Con_M_1_80         | 9401 | 9521 | CATCCGGAGTTCTACAAAAGACTGCTGACACAGAAGTTGCTGACAGGGACTTTCCGCTGGGGACTTTCCAGGGGAGGCGTGGCTGGGGCGGACTGGGGAGTGGCTAACCCCTCAGATGCTG    |
| 176861_8776076_HIV1-Con_M_1_81         | 9520 | 9640 | GCATATAAGCAGCTGCTTTTTCGCTGTACTGGGTCTCTCTGTGTAGACCAGATCTGAGCCTGGGAGCTCTCTGGCTAGCTAGGGAACCCACTGCTTAAGCCTCAATAAAGCTTGCCTTGA     |
| 176861_8776076_HIV1-Con_M_1_82         | 9639 | 9731 | AGTGCTTTAAGTAGTGTGTGCCCCGTCTGTTGTGTGACTCTGGTAACTAGAGATCCCTCAGACCCTTTAGTCAGTGTGAAAAATCTCTAGCA                                 |
| 176861_8776077_Con_M_7056-7462-B_1_1   | 0    | 120  | AAATPGCACTGATGTGAAGAATGTCTACTAATACCAATAGTACTAATACCAATAATAGTAGTAGGGAAGATGATTGAGGAAGAAGGAGAAATAAAAAAAGTCTCTTTCAATATTACCACAAG   |
| 176861_8776077_Con_M_7056-7462-B_1_2   | 119  | 239  | GAATAAGAAATAAGGTGCAGAAAGAATATGCACCTTTTTTATAAACTTGATGTAGTACCAATAGATAATGATAGAATAATAATACCAGCTATAGGTTGGTAAGTTGTAATACCTCAGTCA     |
| 176861_8776078_Con_M_2467-2616-B_1_1   | 1    | 120  | CAGAAGAGAGCTTCAGGTTTGGGGAAGAGACAACAACCTCCCTCTCAGAAGCAGGAGCCGATAGACAAGGAACCTGTATCCTTTAGCTTCCCTCAGATCACTCTTTGGCAACGACCCCTCG    |
| 176861_8776079_Con_M_6368-6796-B_1_1   | 0    | 120  | AGCGACGAAGAGCTCCTCAAGACAGTCAGACTCATCAAGTTTCTCTATCAAAGCAGTAAGTAGTACATGTAATGCAATCTTTACAAATATTAGCAATAGTAGCATTAGTAGTAGCAGTAA     |
| 176861_8776079_Con_M_6368-6796-B_1_2   | 119  | 239  | ATAATAGCAATAGTTGTGTGGTCCATAGTATTCATAGAATATAGGAAAAATTAAGACAAAAGAAAAATAGACAGGTTAATTGATAGAATAAGAGAAAAGCAGAGAAGCAGTGGCAATGAG     |
| 176861_8776079_Con_M_6368-6796-B_1_3   | 238  | 358  | GAGTGAAGGGGATCAGGAAGAATTTATCAGCACCTTGTGGAGATGGGGCACCATGCTCCTTGGGATGTTGATGATCTGTAGTGCTGCAGAAAACTTGTGGGTACAGTCTATTATGGGGTAC    |
| 176861_8776080_Con_M_9296-9761-B_1_1   | 0    | 120  | GAGACTTACTCTTGATTGTAACGAGGATTGTGGAACCTTCTGGGACGCAAGGGGTGGGAAGCCCTCAAAATATTGGTGGAATCTCCTACAGTATTGGAGTCAGGAACATAAGAAATAGTGTCTG |
| 176861_8776080_Con_M_9296-9761-B_1_2   | 120  | 240  | TTAGCTTGTCTTATGCCCACGCCATGACAGTAGCTGAGGGGACAGATAGGGTTATAGAAGTAGTACAAGAGCTTATAGAGCTATTCTCCACATACCTAGAAGAATAAGACAGGGCTTTGG     |
| 176861_8776080_Con_M_9296-9761-B_1_3   | 240  | 359  | AAAGGGCTTGTATGAGCAGGGTGGCAAGTGTGTCAAAACAGTAGTGTGGGTGGAGCTGCTGTGAAGGAAAGAAATGAGACAGCTGAGCAGGTCAGGACAGATGGGGTGGGAGCAGTATTC     |
| 176861_8776081_Con_M_10162-10299-B_1_1 | 1    | 120  | ACAACCTGCTTGTGTACACCCCTATGAGCCAGCATGGAATGGATGACCCGGAGAAAGAGTGTAGTGTGGAAGTTTGACAGCCGCTAGCATTTTCATCAGATGGCCCGAGAGCTGCATCCG     |
| 176861_8776082_Con_M_9697-9858-BD_1_1  | 1    | 120  | CAGCAGCAGATGGGGTGGGAGCAGTATCTCGAGACCTGGAAAAACATGGGGCAATCACAAGTAGCAATACAGCAGCTACTAATGCTGACTGTGCTGCTAGAAGCACAAGAGGAGGAG        |
| 176861_8776083_Con_M_7056-7480-D_1_1   | 0    | 120  | AAACTGTAGTGTGAATTTGAGGAACAATGGCACTATGGGGAACAATGTCTACTACAGAGGAGAAAGGAATGAAAACTGCTCTTTCAATGTAACACAGTACTAAAAAGATAAGAGCAGCA      |
| 176861_8776083_Con_M_7056-7480-D_1_2   | 119  | 239  | AAGTATATGCATTTTTTATAGACTTGATATAGCAATAGACAAATAGTATAGTAGTATACCAATAGTACCAATATAGGTTAATAAATTTGAATACCTCAGGATTAACAGGCTTTGTCCAA      |
| 176861_8776084_Con_M_7722-8005-Dcm_1_1 | 0    | 120  | CGAGCTTAACAATACTATAAACATTACTTGTATAAGGCCCTGGCAACAATAACAAGAAAAAGTATACATTTAGGACCAGGGCAGGCATTTCTATGCAAAAAATATAATAGGAGACATAAGAAA  |
| 176861_8776084_Con_M_7722-8005-Dcm_1_2 | 119  | 239  | AAGCACATTGTAATATTAGTGGAAACAAATGGAATAACACTCTACAACAGGTAGCTAAAAAATTAGGAAAGCTCTATAACAAAAACAATAATTTTTAAACCATCTCAGGAGGGGACCCAG     |
| 176861_8776085_Con_M_180-486-D_1_1     | 0    | 120  | CCACTGAAGGAGAGACAACACTGCTTGTGTACACCCCTATGTGCCAGCATGGAATGGAGGACCCGAGAGAGAAGTGTAGTGTGGAGATTTAACAGCAGACTAGCATTTGAACACAAGGCC     |
| 176861_8776085_Con_M_180-486-D_1_2     | 119  | 239  | CAGAGCAGCATCCGAGCTTTACAAAAGCTGTCGACCCGAGGGGAAAGACTGTGACACCGGATTTTCTACAAGGACTTTCCGCTGAGGAGCTTTCCAGGAGGGCTGGCCCTGGGCGGG        |
| 176861_8776086_Con_M_2135-2263-D_1_1   | 1    | 120  | GAGCCAAGCAACAAGTGCAGCTGCTGCAATAATGATGCAGAGAGGCAATTTTAAGGGCCCAAGGAAAAATTGTTAAGTGTTCACCTGTGGCAAGAAAGGGCAGATAGCAAAAAATTGCA      |
| 176861_8776087_Con_M_2138-2263-D_1_1   | 1    | 120  | CCAAGCAACAAGTGCAAAATGCTGCTGCAATAATGATGCAGAGAGGCAATTTTAAGGGCCCAAGGAAAAATTGTTAAGTGTTCACCTGTGGCAAGAAAGGGCAGATAGCAAAAAATTGCA     |



|                                        |     |     |                                                                                                                                 |
|----------------------------------------|-----|-----|---------------------------------------------------------------------------------------------------------------------------------|
| 176861_8776088_Con_M_180-506-A_1_1     | 0   | 120 | CCACTGAGGGGAGAGAACAACAGCCCTATTACACCCCTATATGCCAACATGGAATGGATGATGAGGAGAAAGAGTGTAAATGTGGAAGTTTGACAGCCGCTGGCCTAAAAACACAGAGCCC       |
| 176861_8776088_Con_M_180-506-A_1_2     | 119 | 239 | CGAGAGCTGCACTCCGGAGTTCTACAAAGACTGCTGACACAGAAAGTTGCTGACAAAGGGACTTTCCGCTGGGGACTTTCCAGGGGAGGTGTGGTTTGGGCGGAGTTGGGAGGTGGCTTAAGCCC   |
| 176861_8776089_Con_M_2545-2671-D_1_1   | 1   | 120 | AGGAAGACAAGACAAGGAACCTGTATCCCTTAGCTTCCCTCAATCACTCTTTGGCCACGACCCTTGTGCACAATAAAGATAGGGGGACAGCTTAAAGGAAGCTCTATTAGATACAGAGG         |
| 176861_8776090_Con_M_6367-6649-D_1_1   | 0   | 120 | CAGCGACGAAGACCTCCTCAAGGGCGGTGAGACTCATCAAGTTCTCCTGTACCAAAGCAGTAAGTAGTATGTAATGCAACCTTTTAGAGATATTAGCAATAGTAGCATTTAGTAGCGCTA        |
| 176861_8776090_Con_M_6367-6649-D_1_2   | 119 | 239 | AATAATAGCAATAGTTGTGTGGACCATAGTATTCTATAGAATATAGGAAAAATAAAAGGCCAAGAAAAATAGACTGGTTAATTGATAGAATAAGAGAAAGAGCAGAAGACAGTGGCAATGA       |
| 176861_8776091_Con_M_7722-8002-D_1_1   | 0   | 120 | ACAGCTTAAATGAATCTGTAGAAATTAATTGTACAAGGCCCTACAACAATAACAAGACAAAGTACACCTATAGGACCAGGGCAAGCACTCTATACAACAAGAATAATAGGAGATATAAGACA      |
| 176861_8776091_Con_M_7722-8002-D_1_2   | 119 | 239 | AAGCACATTGTAATATTAGTAGAACAGAATGGAATAAAAACTTTACAACAGGTAGCTAAAAAATTAGGAAAACCTTTTAAACAAGACAACAATAAATTGTTAAACCATCCTCAGGAGGGGACC     |
| 176861_8776092_Con_M_9296-9436-D_1_1   | 1   | 120 | AGACTTAAATCTTAATTGACGCGAGGATTGTGGAACCTCTGGGACGCGAGGGGGTGGGAAGCCCTCAAATATCTGTGGAATCTCCTGCACTATTGGAGTCAGGAACTGAAGAAATAGTGCTA      |
| 176861_8776093_Con_M_10162-10299-D_1_1 | 1   | 120 | ACAACCTGCTTGTGTACACCCCTATATGCCAGCATGGAATGGAGGACCCGGAGAGAGAAGTGTAGTGTGGAGATTTAACAGCAGACTAGCATTTGAACACAAGGCCCGAGAGAAAGCATCCG      |
| 176861_8776094_Con_M_7056-7507-A1_1_1  | 0   | 120 | ACATTGTACAAATGTCAAAAGTGTCAACACCCTGGAGACAGGGGAAGGCTTAAAAAACTGCTCTTTCAATATGACCACAGAACTAAGGGATAAGAGACAGAAAGTATATTCACTTTTTTA        |
| 176861_8776094_Con_M_7056-7507-A1_1_2  | 119 | 239 | ATAGACTTGATATAGTACCAATTAATGAAAATCAGGGTAGTGAATATAGATTAATAAATGTGAATACCTCAGCCATTACACAGGCGTGCCCAAAAGGTATCCCTTTGAGCCAATTCCCTATAC     |
| 176861_8776095_Con_M_9726-9875-A_1_1   | 1   | 120 | GGAGTAGGAGCAGTATCTCAAGATTTAGATAAACATGGAGCAGTCACAAGCAGGAATATAAATCACCCTAGTTGCGTCTGGCTGGAAGCGCAAGAGGAAGAGGAGGTAGGCTTTCCAGT         |
| 176861_8776096_Con_M_2122-2259-A_1_1   | 1   | 120 | TGGCTGAGGCAATAGAGTCAAGTACAACATACAAACATAATGATGCAGAGAGGCAATTTTAGGGGCCAGAAAAAGAAATTAAGTGTTTCAACTGTGGCAAAAGAGGACACCTAGCCAGAAAT      |
| 176861_8776097_Con_M_2475-2621-A_1_1   | 1   | 120 | GAGAGCTTTGGGATGGGGGAAGAGATAACCTCCCCCTCTGAAGCAGGAGCAGAAGAACAGGGAACAGCACCCTCCTTCAGTTTCCCTCAAACTCACTCTTTGGCAACGACCCCTTTGTCA        |
| 176861_8776098_Con_M_2545-2674-A_1_1   | 1   | 120 | AGAAGACAGGGAACAGCACCCTCTTCAGGTTCCCTCAAACTCCTTTGGCAACGACCCTTTGCACAGTAAAAATAGGAGCAGCTTAAAGGAAGCTCTATTAGATACAGGAGCGAG              |
| 176861_8776099_Con_M_6362-6629-A_1_1   | 0   | 120 | GGAGACACCGACGAGGAACCTCCTCAGAGCAGTAAGGATCATCAAAATCCTATACCAAAGCAGTAAGTATTAGTAATTAATATATGTAATGACTCCTTTGGAAATCTGTGCAATAGTAGGA       |
| 176861_8776099_Con_M_6362-6629-A_1_2   | 119 | 239 | ACTGATAGTAGCGTTAATCTTAGCAATAGTTGTGTGGACTATAGTAGGTATAGAATATAAAGAAATGCTTAAGACAAAGGAAAAATAGACAGGTTAATTGAAAGAAATAGAGAAAGAGCAGA      |
| 176861_8776100_Con_M_9726-9869-A_1_1   | 1   | 120 | GGAGTAGGAGCAGTATCTCAAGATTTAGATAAACATGGAGCAGTCACAAGCAGTAATACAGCAGCTACTAATGCTGATTGCGCTGGCTGGAAGCGCAAGAGGAAGAGGAGGTAGGCTT          |
| 176861_8776101_Con_M_10126-10263-A_1_1 | 1   | 120 | CAGATGAAGTAGAAGAGGCTACTGAGGGAGAGAACAAACAGCCTATTACAGCCTATATAGCCAAACATGGAATGGATGATGATGAGAGAGAAGTGTAAATGTGGAAGTTTGACAGTCCGCTG      |
| 176861_8776102_Con_M_7056-7483-02_1_1  | 0   | 120 | AGAATGTGGTAACGTCAACAAAAACAATTTCACTGACAAAAACATGAAAGAGGAAAAATAAACTGCTCTTACAATGCAACCACAGAAATTAAGAGATAAGACACAGAAAAATATATTCCT        |
| 176861_8776102_Con_M_7056-7483-02_1_2  | 119 | 239 | TTTTTTATAGACAGGATGTGGTACAAATTGATGAAAACAATAGTCATGGTAGAAAACAGTAGTAATAGGTATAGACTGATAAATTGTAATACCTCAACCAATTACACAGGCTTGTCCAAAGG      |
| 176861_8776103_Con_M_305-489-cr02_1_1  | 1   | 120 | TGCATCCGGAGTTCTACAAGACTGCTGACACAGAAGTTGCTGCAATGCTGACATGAAGTTGCTGACAGGGACTTTCCGCTGGGGACTTTCCGGGGGAGGTGTGGTTTGGGAGGAGTT           |
| 176861_8776104_Con_M_716-875-cr02_1_1  | 1   | 120 | ACTCTAGACGGTGTAAAAAATCTCTAGCAGTGGCGCCGAACAGGGGACGGAAATTAAGAGGGACTCGAAAGCGAAAGTTCCAGAGAAGTTCTCTCGACGCGAGGACTCGGCTTGCTGA          |
| 176861_8776105_Con_M_7056-7480-G_1_1   | 0   | 120 | AAACTGTACTAATGTCAACCACCACCCTAATGGTACTATAGATAATAGCAATAATATACCGTGGATGGTAAAGAAAGAAAAACCAATTGTTCCCTCAATATAACCACAGAAATAAGAGA         |
| 176861_8776105_Con_M_7056-7480-G_1_2   | 119 | 239 | ACAAAATAAGGCAGGAATACGCGCTTTTCTATAAACTTGATGTAGTACCAATTAATAATGATAATAGAAGTTATATGCTAATAAATTGTAATGTCTCATCCATTAAACAGGCTTGTGCCAA       |
| 176861_8776106_Con_M_297-505-G_1_1     | 1   | 120 | CCGAGAGCTGCATCCGGAGTACTACAAGACTGCTGACACAGAAGTTGCTGACAAGGACTTTCCGCTGGGACTTTCCGGGAGGCGCGGCTGGGAGGGCTGGGAGTGGCTGAACC               |
| 176861_8776107_Con_M_716-870-G_1_1     | 1   | 120 | ACTCTAGACAGTGTAAAAATCTCTAGCAGTGGCGCCGAACAGGGACTTGAAGCGAAAGTTAATAGGGACTCGAAAGCGAAAGTTCCAGAGAAGTTCTCTCGACGCGAGGACTCGGCTT          |
| 176861_8776108_Con_M_1141-1537-G_1_1   | 0   | 120 | GAAACAGCAGAAGGTTGTCAACAAATAATGGGACAGTTGCAACCAGCTCTCCAGACAGGAACAGAGGAGATTAGATCATTTATTTAATACAGTAGCAACCCCTCTATTGTTGACATCAAAG       |
| 176861_8776108_Con_M_1141-1537-G_1_2   | 119 | 239 | GATAGAGGTAAAAAGACACCAAAGAGCTCTAGAGGAAGTGGAAAGATACAAAAGAAAGTGCAGCAAAAAATACAGCAGGCAGCAAAAGGATGAAGGAACAGCAGCCCAAGTCAGCCAAAAA       |
| 176861_8776108_Con_M_1141-1537-G_1_3   | 238 | 358 | ATTATCTCTATAGTGTGCAAGATGTGCAAGGGCAAATGGTACACAGGCCATATCACTTGAACCTTTGAATGCATGGGTAAAAAGTAGTAGAAGAAAAGGCCTTCAGCCACAGAAGTAATACCCA    |
| 176861_8776109_Con_M_2122-2250-G_1_1   | 1   | 120 | TAGCTGAGGCAATGAGCCAGGCATCAGGTGCAGCAGCAGCCATAATGATGCAGAAAAACAATTTTAAGGGCCCAAGAAGAAATATTAAGTGTTTCAACTGTGGCAAGGAAGGACATCTA         |
| 176861_8776110_Con_M_6363-6630-G_1_1   | 0   | 120 | GAAACACCGACGAGGAACCTCCTCAGAGCAGTAAGGATCATCAAATCCTGTACCAAAGCAGTAAGTAGTAATAATTAGTATATGTAATGCAATCATTAGAATATCTGCAATAGTAGGAC         |
| 176861_8776110_Con_M_6363-6630-G_1_2   | 119 | 239 | CTAATAGTAGCATTATAGCAGCCATAGTTGTGTGGACCATAGTATTTATAGAATATAGGAAAAATAAGAAAAACAGAAAAAATAGAAAAAGTTACTTGATAGAATAAGAGAAAGAGCAGAA       |
| 176861_8776111_Con_M_9713-9862-G_1_1   | 1   | 120 | AGAAGGAGTAGGAGCAGTATCTCAAGATTTAGATAAGCATGGAGCAATCAAGCAGCAATACAGAGCAGTATGAGGACCAATAATCCTGATTGTGCTGGCTGGAAGCAACAAGAGGAGGATTGAGAGG |
| 176861_8776112_Con_M_10126-10263-G_1_1 | 1   | 120 | CAGCAGAGGTAGAGGAAGCCAATAAAGGAGAGAACACAGTTTATTACACCCCTCTGCCAGCATGGAATGGAGGACGAAGACAGAGAAGTGTGGTATGGAGATTTGACAGGAGCCCTA           |
| 176861_8776113_Con_M_7056-7435-C_1_1   | 0   | 120 | AGAATGTGGAATGTTAGTGTGTAGCAATGTTAGTGTGTAGCAATACTACCAGGGGATGCAAAATGTTACCCCAATAGGGGTGCAAAATGAAATAAAAAAATTGCTCTTTCAAGATAGCCAC       |
| 176861_8776113_Con_M_7056-7435-C_1_2   | 119 | 239 | CAGAATTAAGAGATAAGGAGCAGAAAGTGTATGCGCTTTTTATAGACTTGATATAGTACAACCTTAATGATAGTAGTAACCTCTAGTAGTAGTAATAACTCTAGTAAGTATAGTAAGTATA       |
| 176861_8776114_Con_M_187-478-C_1_1     | 0   | 120 | AGGAGAGACAACCTGTTTGCTACACCCCTATGAGCCAGCATGGAATGGAGGATGAACACAGAGAAGTATTAAGTGGAAAGTTTGACAGTATCCTAGCAGCAGACACATGGCCCCGCGAGCT       |
| 176861_8776114_Con_M_187-478-C_1_2     | 119 | 239 | TACATCCGGAGTATTACAAGACTGTGACACAGAAGGGACTTTCCGCTGACACAGAAGGGACTTTCCGCTGGGACTTTCCACTGGGGCGTTCCAGTGGGGCGTTCTAGGAGGAGTGGTGC         |
| 176861_8776115_Con_M_2390-2554-C_1_1   | 1   | 120 | GAA'TTTCCTTCAGAGCAGACCAGAGCCCAACAGCCCCACCGCCAGAGCCAACAGCCCCACCAGCAGAGAGCTTCAGGTTTCAGAGGAGACAACCCCCGCTCCGAAGCAGGAGCCGAAAGACA     |
| 176861_8776116_Con_M_6307-6562-C_1_1   | 0   | 120 | TGTCCTAGTTTGCTTTTCAGACAAAAGGCTTAGGCATTTCCCTATGGCAGGAAGAAGCGGAGACAGCGACGAAGCGCTCCTCCAAGCAGTGAGGATCATCAAATCCTATATCAAAGCAGTAA      |
| 176861_8776116_Con_M_6307-6562-C_1_2   | 119 | 239 | AGTACTAAATAGTATATGTAATGTAGATTAAATAGCAAGAGTAGATTAGATTAGTATAGTACCAATATCATAGCAATGATGTGTGTGACCAATATCATAGCAATGATGATATATAG            |
| 176861_8776117_Con_M_7722-7999-C_1_1   | 0   | 120 | ACATCTTAATGAATCTGTAGAAATTGTGTGTACAAGACCCAACAATAATAACAAGAAAAAGTATAAGGATAGGACCAGGACAAGCATTCTATGCAACAGGAGACATAATAGGAGACATAAG       |
| 176861_8776117_Con_M_7722-7999-C_1_2   | 119 | 239 | GACAAGACATTTGTAACATTAGTAAAAATAAATGGAATAAACTTTACAAAAGGTAAGGGAAAAAATAGAAAAACACTTCCTAATAAAAAAATAAATTTGAACCAACCTCAGGAGGGG           |
| 176861_8776118_Con_M_9712-9864-C_1_1   | 1   | 120 | CAGAGGGAGTAGGAGCAGCGTCTCAAGACTTAGATAAACATGGGGCACTTACAAGCAGCAACACACCCGCCAATAATGCTGATTGTGCTTGGCTGGAAGCGCAAGAGGAGGAAGAAAGAA        |
| 176861_8776119_Con_M_10169-10309-C_1_1 | 1   | 120 | TTTGCTACACCCCTATGAGCAGCATGGAATGGAGGATGAACACAGAGAAGTAAAGTGGAAAGTTTGACAGTCACTAGCAGCAGACATGAGCCCGCGAGCTCATCCGGAGTATT               |
| 176861_8776120_Con_M_7056-7476-F1_1_1  | 0   | 120 | AAATTTGTAATAATGCCACTACCACCAATGACACTCTCTCTGACCAAAGCAGTACCTCGAAGGAAGAACAGGGGCAATACAAAATCTGTCTTTCAATATGACCACAGAAGTAGAAGATAA        |
| 176861_8776120_Con_M_7056-7476-F1_1_2  | 119 | 239 | AGAAGCAGAAAGTACATGCGCTTTTTTATAGACTTGATATAGAACCAATCAGCAATAATAATAGCAGGGAAGAAATATAGGCTAATAACTTGTAAATACCTCAACCAATTACACAGGCTTGTG     |
| 176861_8776121_Con_M_297-450-F_1_1     | 1   | 120 | CAGAGAGAAACATCCGGAGTTCTACCAAGACTGAGACTGTGACACAGAGATTGCTGACATAGAAGATTAGAGATTGCTGACATAGAAGATTCTAAGGGGACTTTCCGCTGGGGACTTT          |
| 176861_8776122_Con_M_1104-1363-F_1_1   | 0   | 120 | GAGACTAGAACGATTTGCACTTTGATCCTGCGCTTTAGAAAACATCAGAAAGTGTGCAGAAAAATAATAGGACAGCTACAACCATCCCTTCAGACAGGATGACAAGAGCTTAGATCATTTATA     |
| 176861_8776122_Con_M_1104-1363-F_1_2   | 119 | 239 | ATAATACAGTAGCAGTCTCTATTATGTACATCAAAGATAGAGGTAAGGACACCAAGGAAGCTTTAGATAAGCTAGAGGAAGAACAAAAAAGTGCAGCAAGACACAGCAAGCGG               |
| 176861_8776123_Con_M_2545-2674-F_1_1   | 1   | 120 | AGAAAGACGAGGACAGTATCCTCCCTTAGCTTCCCTCAATCACTCTTTGGCAACGACCCTTAGTCACAATAAAGTAGGGGGGAGCTAAGGGGAAGCTCTATTAGATACAGGGGCGAG           |

|                                          |      |                                                                                                                                  |
|------------------------------------------|------|----------------------------------------------------------------------------------------------------------------------------------|
| 176861_8776124_Con_M_5536-5658-F2_1_1    | 1    | 120 ATCCAAGAGTAAAGTTCAGAAGTACACATCCCCTAGAGGATGATTCTAAATTAGTAATAGTAACCTATTGGGGTCTACATACAGGAGAAAGAGATTGGCATTGGGTCAAGGAGTCTCC       |
| 176861_8776125_Con_M_6299-6693-F_1_1     | 0    | 120 GCTTTTCATTGCTACTGGTGCTTTTACAACGAAGGGCTTAGGCATCTCCTATGGCAGGAAGAAGCGGAGACAGCGACGAAGAACTCCTCAAGAGCAGTCAGATACATCAAGATCCTGTACCA   |
| 176861_8776125_Con_M_6299-6693-F_1_2     | 119  | 239 AAGCAGTAAGTATTGTAAAGTAGTATATGTAGTCATATTGTGTACCAATAGCAATAGTACTTAATAGTACCTAATAATAGCAATAGTTGTGTGGACTATAGTATATAGAAAT             |
| 176861_8776125_Con_M_6299-6693-F_1_3     | 238  | 358 ATAAGAAACTGTTAAAGGCAAAGAAAATAAATAGGTTATATGAAAGAAATAAGAGAAAGAGCAGAGACAGTGGCAATGAGAGTGAGGGGGATGACAGAGGAATTGGCAGCACTTGGGGA      |
| 176861_8776126_Con_M_9296-9558-F_1_1     | 0    | 120 GAGACTTCATATTAATTGCAGCGAGGACTGTGGACAGGGGACTGAGGAGGGGGTGGGAAGCCCTCAAATATCTGTGGAATCTCAGCGAGTATTGGAGTCAGGAACTAAGAAATAGTGC       |
| 176861_8776126_Con_M_9296-9558-F_1_2     | 119  | 239 ATTAGTCTGCTTAATACCACAGCAATAGTAGTAGCTGAGGGGACAGATAGAGTTATAGAAGCTTTGCAAGAGCTGGTAGAGCTGTTCTCAACATACCTAGAAGAAATAAGACAGGGCTTT     |
| 176861_8776127_Con_M_9700-9858-F_1_1     | 1    | 120 CAGCAGAAGGGGTGGGAGCAGTGTCTCAAGACTTAGATAGACGGGGGGCAATTACAAGCAGCAATCTGGAGCTACTAATCTCTGACTTGGCCTGGCTGGGAAGCACAAGAGGAAGAGGA      |
| 176861_8776128_Con_M_180-299-02FGHJK_1_1 | 1    | 120 CAATGAAGGAGAGAAACAACAGCTTATTACACCCCATGTGCCAACATGGAATGGAGGATGAAGACAGAGAAGTACTGATGTGGAAGTTTGACAGCAGCCTGGCACTGAGACACATAGCCC     |
| 176861_8776129_Con_M_892-1032-H_1_1      | 1    | 120 AGGCGAGGGGCGGCGCAGCTGGTGAGTACGCCGAAAAATTTTATTTTGACTAGCGGAGGCTAGAAGGAGAGAGATGGGTGCGAGAGCGTCAGTATTAGCGGGGAAAAATTAGATGCT        |
| 176861_8776130_Con_M_6305-6587-H_1_1     | 0    | 120 ATTGCCAATTGTGCTTTTTTAAAGAAAGGCTTAGGCATTTCTATGGCAGGAAGAAGCGGAGACAGCGACGAGGAACCTCTGCAAGTTTGCAAGATCATCAAAATCCTATACCAAGCAGT      |
| 176861_8776130_Con_M_6305-6587-H_1_2     | 119  | 239 TAAGTATCATAAATGTATATATTAGGAATAGGAATAGGAGCACTAGTAGTAGCAATTTATCATAGCCATAATTGTGTGGACCATAGTATATAGAAATAGGAACCTGGTAAAGCAAAAG       |
| 176861_8776131_Con_M_7722-7999-H_1_1     | 0    | 120 ACAGCTTAATGAACCTGTAGAAATTAACGTGTACCAGACCTAACAATAATACAAGAAAAAGTATACATATAGGGCCAGGACAAGCATTCTATGCAACAGGTGACATCATAGGAGATATAAG    |
| 176861_8776131_Con_M_7722-7999-H_1_2     | 119  | 239 GACAGACACATTGTAATATTAGTGGAAAAAATGGAATAAGACTTTACACAAGGTAGTTACACAATTAAGAAAAACACTTTAACAAATAAAACAATAATTTTTAAACCATCCTCAGAGGGG     |
| 176861_8776132_Con_M_9300-9440-H_1_1     | 1    | 120 TTACTCTTGATTGTAGCGAGGACTGTGGAACCTCTCTGGGGAGAAGGGGGTGGGAAGCCCTCAAATATCTGTGGAATCTTCTGCAGTATTGGGGACAGGAGCTAAAGAATAGTGCTATTAA    |
| 176861_8776133_Con_M_9712-9861-H_1_1     | 1    | 120 GATCAGGTCCCTCTGGCAGTAAAGATCAATCAAGATCTTATACCAGAGCAGTAGTAAGTACACTACAATAACAGCAGCTACTAATCTCTGATTCCGCTGGAGCACAAGAGGAAAGAGGA      |
| 176861_8776134_Con_M_304-488-HJ_1_1      | 1    | 120 ATGCATCCGGAGTTCTACAAAGACTGCTGACACAGAAGATGCTGACAATGCTGACACGGAGGATTCTACAGGGACTTTCCGCTGGGGACTTTCCAGGGGAGGTGTGGTCTGGGCGGGT       |
| 176861_8776135_Con_M_1134-1411-J_1_1     | 0    | 120 CCTCTAGAGTTCAGCAAAAGGCTGTCAACAATACTAGTAGAGCTCCAACAGGCTCTTCAGACAGGAACAGAGAAATAAATCATTATATAATACAGTAGCAACCCCTCTATTGCGTACA       |
| 176861_8776135_Con_M_1134-1411-J_1_2     | 119  | 239 ATCAGAGGATAGAGATAAAAGACACCAAGGAAGCTTTAGACAAGATAGAGGAACCTTCAAAACAAAAACAAGCAGCAGGCACAGAAAGCAGAACTGACAAAAAGACAACAGTCAGGTCA      |
| 176861_8776136_Con_M_6374-6793-J_1_1     | 0    | 120 GATCAGTCCCTCTGGCAGTAAAGATCAATCAAGATCTTATACCAGAGCAGTAGTAAGTAAATCAATTAGCATATGTGAATGATACCTTTACAAATAGCAGCAATAGTAGCATTAATAGTAGAT  |
| 176861_8776136_Con_M_6374-6793-J_1_2     | 119  | 239 TTTTCTCTGCAATAGGTGTGTGGACTATAGTGTATATAGAATATAGGAACTGTTAAGACAAAGGAAAAATAGATAAGTTAATTGATAGAATAAGAGAAAGAGCAGAAGACAGTGGTAAC      |
| 176861_8776136_Con_M_6374-6793-J_1_3     | 238  | 358 CGAGAGTGATGGAGACACAGATAGTTGGCAAACTTGTGGAGATGGGGCCTCATGATCTTTGGAATGTTAATGATTTGTAATGCTACAGAAAACTTGTGGGTACAGTCTATTATGGGG        |
| 176861_8776137_Con_M_7722-7999-J_1_1     | 0    | 120 ACACTTAATGAACTGTAGAAATATTGTGTACCAGACCTAACAACAATACAAGAAAAGGTATACACATGGGACCAGGACAAGTGCTCTATGCAACAGGGGAAATAATAGGAGATATAAG       |
| 176861_8776137_Con_M_7722-7999-J_1_2     | 119  | 239 GAAAAGCACATTGTAACATTAGTGGAAAAGATTGGAATTAACACTTTACGTAGAGTAGCTACAAAACCTAAAGAGAACACTTTAATAATAAAACAATAAACTTTACATCACCTCAGGAGGG    |
| 176861_8776138_Con_M_9296-9559-J_1_1     | 0    | 120 GAGACTTCGCTCTGTATTGCAGCGAGGACTGTGGAACCTCTGGGACTCAGGGGGTGGGAGATCCTCAAATATCTGGGGAACCTTGTATGGTATTGGGGCAGGAACCTAAAGAATAGTGCTA    |
| 176861_8776138_Con_M_9296-9559-J_1_2     | 119  | 239 ATTAGTTTGCTTAATACCACAGCAATAGCAGTAGCTGAAGGAAACAGATAGAATCATAGAAATAGTACAAAGAGCTTTTAGAGCTATTCTTTCACATACCTAGAAGAAATAAGACAGGGTTTA  |
| 176861_8776139_Con_M_10126-10263-J_1_1   | 1    | 120 CAAGCGAAGTAGAGGAAGCTAATGAAGGAGAACCACTGCCTGTTACACCCCATATGCCAGCATGGAATAGAGGATGAAGAAAGAGAAGTGTTAATGTGGAAGTTTGACAGCTCCCTA        |
| 176861_8776140_Con_M_9296-9436-K_1_1     | 1    | 120 AGACTTAATCTTAAATTCGCGAGCGGATTTCTGGAAGGGGACTGAGGGGGGGTGGGAAGCCCTCAAATATCTGTGGAACTCTGTGGAACCTGGTACAGATTAGGGGTGAGAACTAAGTGCCA   |
| 176861_8776141_Con_M_6931-7050all_1_1    | 1    | 120 ATGTAACAGAAAAATTTAACATGTGGAAAAATAACATGGTAGAACAGATGCATGAAGATATAAATCAGTTTATGGGATCAAGCCCTAAAGCCATGTGTAAAGTTAACCCCACTCTGTGTT     |
| 176861_8776142_Con_M_7470-7589-all_1_1   | 1    | 120 GCTTGTCCAAAGGTATCCCTTTGAGCCCAATTGCCATACATTTATGTGCTCCAGCTGGTTTGTGCGATTCTAAAGTGTAATGATAAGAAAGTTCAATGGAAACAGGACCATGCAAAAATGTGAG |
| 176861_8776143_Con_M_8341-8460-all_1_1   | 1    | 120 AGAGCTTCAGAGCTGAGAGTAGGAGGACAATTGAGGAAGTGAATTATATAATATAAGTAGTAAAAATTGAAACCCTAGGACCTAGGAGTAGCACCACCAAGGCAAGAGGAAGAGTG         |
| 176861_8776144_HIV1-ConN_1_1             | 0    | 120 TTCTCGCTTGACTGGGTCTCTCTGTGCTGGACCAGATTAGAGCCTGGGAGCTCTCTGGCTAGCAGGGAACCCACTGCTTAAGCCTCAATAAAGCTTGCCCTGAGTGCTAAAGTGGTGTGT     |
| 176861_8776144_HIV1-ConN_1_2             | 119  | 239 TGCCCATCCATTTCGGTAACTCTGGTACTCTAGAGATCCCTCAGACCACTAGACTGAGTGAAAAATCTCTAGCAGTGGCGGCCGAACAGGGACTTGAAAAAGTAGAACCAGGAGGCTG       |
| 176861_8776144_HIV1-ConN_1_3             | 238  | 358 GAATCTCTCAGCAGCAGGACTCGGCTCGTTGGTGCACACAGCGAGGCGAGGCGGGGGAAGTGTGAGTAGCACAATTTTGACTGGCGGTGGCCAGAAAGTAGGAGAGAGGATGGGTGCGAG     |
| 176861_8776144_HIV1-ConN_1_4             | 357  | 477 GAGGCTCAGTGTTAAACAGGGGGAAAAATTAGATCAATGGGAAGCAATTTATTTTGAGACCAGGGGGGAAGAAAAAATACAGAATGAACACTTTAGTATGGGCAGAGGGGAGCTGGAAGAT    |
| 176861_8776144_HIV1-ConN_1_5             | 476  | 596 TTCGCTTGTAACCCAGGTCTCATGGACACAGCGGACGGCTGTGCCCAGTTACTAAACCAATTAGAACCAGCTCTCAAGACAGGGTCAGAAGGACTGCGCTCTTTATATAACACCCCTAGCA    |
| 176861_8776144_HIV1-ConN_1_6             | 595  | 715 AGTTCTTTATGTGTCCATAGTAGAATAACAGGTACACAATACACAAGAAGCTTTGGACAAGATAAAAGAGAAAAAGGAACAGCACAAGCCCGAGCCAAAAAACCAGAAAGCAGGGGCAGC     |
| 176861_8776144_HIV1-ConN_1_7             | 714  | 834 CGGCAGCAGCTGATAGCAATATCAGTAGGAATTTATCCTCTAGTCCAGAAATGCTCAAGGACAAATGGCACATCAGCCGCTGACACCCAGAACTTTAAATGCTTGGGTAAAAAGTGATAGAGG  |
| 176861_8776144_HIV1-ConN_1_8             | 833  | 953 GAGAAGGCCTTTAATCCAGAAGTAATACCAATGTTTATGGCCTTGTGAGAAGGGGCAACAGCCCTCAGATCTAAATACTATGTTTAAATACAGTAGGAGGACATCAGGCAGCTATGCAGATG   |
| 176861_8776144_HIV1-ConN_1_9             | 952  | 1072 GCTAAAGGAAGTCATCAATGAGGAAGCAGCAGAATGGGACAGGACGCATCCAGTCCCTGTGGGACCCTACCCCAAGGCAACTGAGAGAACCTAGAGGAAGTGATATAGCAGGGACAAC      |
| 176861_8776144_HIV1-ConN_1_10            | 1071 | 1191 CTAGTACTCTGGCAGAACAGGTGGCATGGATGACTGCTAATCCTCCTGTTCACAGTAGGAGATATTTATAGAAGATGGATAGTTCTGCGGTTAAACAGAATTTGTGAGAAATGATATGCTCTG |
| 176861_8776144_HIV1-ConN_1_11            | 1190 | 1310 CTAGCAGATTCTAGAGATCAAAACAAGGACCAAAAGAACCCTTTAGAGACTATGTAGACAGGTTCTACAAACCTTTAAGAGCAGAGCAGGCAACACAGGAAGTAAAGAATTTGGATGACAGAA |
| 176861_8776144_HIV1-ConN_1_12            | 1309 | 1429 AACACTCTTAGTACAAAATGCAAAACCCAGATTGTAACAGATCCTCAAGACATTTAGAACCATTCAGGCGCAGGAGCTACCTTAGAAGAGATGATGACAGCCCTGAGGAGCAGGACCATAA   |
| 176861_8776144_HIV1-ConN_1_13            | 1428 | 1548 AGGCAAGAGTGCTAGCAGAGGCTATGTACAGGTACAGGCAACAACCTAGTGTCTTTTGCACAAAGGGGAAACTTTAAAGGCATAAGGAAAAACCTTAATGTGTTCAATTGTGGCAAAAGAGG  |
| 176861_8776144_HIV1-ConN_1_14            | 1547 | 1667 GGCCATTGGCAAGAAACTGTAAGGCCCTTAGAAGAGGGGGCTGTTGGAAGTGTGGGCAAGAAGGACATCAAATGAAAGATTGTAAAAATGAAGGAAGACAGGCTAATTTTTTAGGAAAG     |
| 176861_8776144_HIV1-ConN_1_15            | 1666 | 1786 GGGCTGGTCTCCCTTCAAAGGGAGACAGGAAACTTCCCCAGACAACAACAAGGAAAGAGCCACAGCCCGCCACTAGAGAATTATGGGTCTCAGGAGGAGAGGAGCACACAGGGGAA        |
| 176861_8776144_HIV1-ConN_1_16            | 1785 | 1905 AGGAGATCCAGGAGAAACAGGAGAAGACAGAGAATCTCTGTACCAACCCTTAACCTTCCTTCAGATCACTCTTTGGCAACGACCCGTCATCAGTAAAAATAGGAAAAAGAGTAAGAGA      |
| 176861_8776144_HIV1-ConN_1_17            | 1904 | 2024 AAGCTCTTTTAGATACAGGAGCTGATGATACAGTAATAGAAGAAATACAATTAGAAGGAAAAATGGAACCAAAAAATGATAGGAGGAATTGGAGGATTATCAAGTAAGACAATATGATA     |
| 176861_8776144_HIV1-ConN_1_18            | 2023 | 2143 AATATAACAGTAGACATACAAGGAAGAAAAGCAGTTGGTACAGTGTTAGTAGGACCAACACCTGTTAATATTATAGGAAGAAACCTTTTAAACAGATTTGGCTGTACTTTAAATTTTCCA    |
| 176861_8776144_HIV1-ConN_1_19            | 2142 | 2262 AATAAGTCTATTGAACTGTACCAGTAAAAATTAACACAGGAATGGATGGCCCAAGGTAACCAATGGCCTTTGACAGCAGAAAAATAGAGGCATTAAAGAGAAATTTGTACAGAAAT        |
| 176861_8776144_HIV1-ConN_1_20            | 2261 | 2381 TGGAAAAAGGAGAAAAATTTCTAGAAATAGGGCCTGAGAATCCATATAACACTCCAATTTTTGCTATAAAAAAGAAAGATAGCACTAAATGGAGAAATTTAGTGAATTTTACAGGGAATTA   |
| 176861_8776144_HIV1-ConN_1_21            | 2380 | 2500 AATAAAAGGACCAAGATTTTGGGAAGTGCAGCTAGGAATTCACATCCAGCAGGATTAAGCAGAAAAAATCAGTGACAGTTTATAGATGTAGGAGATGCTTATTTTTCATGTCCCTTA       |
| 176861_8776144_HIV1-ConN_1_22            | 2499 | 2619 AGATGAAGATTTTAGAAGATATACAGCTTTTACCATACCTAGTATAAATAATGAGACACCTGGTATTAGATACCAGTATAATGTGTTGCCACAGGGATGGAAGGGGTACCAGCAATTTT     |

|                               |        |      |                                                                                                                               |
|-------------------------------|--------|------|-------------------------------------------------------------------------------------------------------------------------------|
| 176861_8776144_HIV1-ConN_1_23 | 2618   | 2738 | TTCAAAGTTCATATGACAAAAATTCTAGAACCATTTTAGAAAGAAACATCCAGAGATAATCATTTTATCAGTACATGGATGACCTCTATGTGGGACTCTGACTTAGAACTAGCACAACATAGAG  |
| 176861_8776144_HIV1-ConN_1_24 | 2737   | 2857 | GAGACAGTAGAAGAACTTAGAGGTCATCTTTTGAAGTGGGGCTTTACGACCCCTGACAAAAAACATCAAAGGAGGCCACCGTTCTCTTGGATGGGATATAGAGCTCCATCCAGATAAATGG     |
| 176861_8776144_HIV1-ConN_1_25 | 2856   | 2976 | GACGGTCCAGCCCAATAAAGTTACCAGAAAAGGATGTATGGGACTCTCAATTGATATACAAAAATTAGTAGGAAAGTTAAATTTGGGCAAGTCAGATCTATCCAGGAATCAAAGTCAAGCT     |
| 176861_8776144_HIV1-ConN_1_26 | 2975   | 3095 | TTTGTAGATTAACTAGAGGAACAAAAGCTTTGACAGAAGTAGTCACTTTTACAAAAGAACGAAATAGAACTAGACAGAAAACGGGAGATATTAAAGAACCCCTCATGGAGTCTATT          |
| 176861_8776144_HIV1-ConN_1_27 | 3094   | 3214 | TATGACCCAGGAAAAGAATTAAATAGCAGAAATTCAAAAAACAGGACAAGGTCAGTGGACATATCAGATTTATCAGGAGTCATATAAAAAATTTAAAAACAGGAAAGTATGCAAAAAATGAGA   |
| 176861_8776144_HIV1-ConN_1_28 | 3213   | 3333 | ATCTGCCCATCTAATATGATATAAAACAGTTAGTTGAAAGTGATACAAAAAGTGGCAACAGAAAGTATAGTAATTTTGGGGAAAGACTCCTTAAGTTTAAATTTACAGTACAAAAGAGTGGTGTG |
| 176861_8776144_HIV1-ConN_1_29 | 3332   | 3452 | GGGAGGCATGGTGGACTGAGCAATTGGCAAGCAACTTGGATTCTCTGAGTGGGAATTCGTCACACTCTCCCTTTGTAATAATTTAGGTATCAGTGTAGAAACAGAGCCAACTGAGTGGGCG     |
| 176861_8776144_HIV1-ConN_1_30 | 3451   | 3571 | GAAACATACTATTAGTAGTGGAGCAGCTAATAGAGAAAACAAATTTGGGAAAGCAAGGTTTGTGTGACAGTATAGAGAAAGCAAGAAAGTGGTCTTATTGAAGACACCAATCAAAGGCT       |
| 176861_8776144_HIV1-ConN_1_31 | 3570   | 3690 | TGAGTTACAAGCTATCCTTTATGGGCTTACAAGAGTCAGGACAGGAAGTAACATAGTCACCTGACTCTCAGTATGCTATGGGAATAATTCACTCACACCAGATAAAAGTGAATCAGAAATT     |
| 176861_8776144_HIV1-ConN_1_32 | 3689   | 3809 | TTGGTGAGCCAAATTAATAGAGAACTCATAAAAAGGAAAGAGTTTATCTCTCTGGGTATCCCTGCACATAAAAGGATTTGGAGAGTAATGAGCAGAGTAGACAAATTTAGTTAGCTCAGGAATTA |
| 176861_8776144_HIV1-ConN_1_33 | 3808   | 3928 | AGAAAAGTATTATTCTCTAGATGTATAGAAAAGCCCAAGGAAGATCATGAAGAATATCAGAGTAATTTGGAGAGCAATGGCCGAGTTTAACTTACCCCTCATGTGGCAAGAAAATA          |
| 176861_8776144_HIV1-ConN_1_34 | 3927   | 4047 | AGTAGCCAGCTGTGACAAATGCCAGCTAAAAGGGGAAGCCATGCGATGGACAGGTCAATTGTAGTCCAGGAGTGTGGCAGTTAGATTGTACACACTTAGAAGGAAAAATCATTTCTTGAGC     |
| 176861_8776144_HIV1-ConN_1_35 | 4046   | 4166 | CAGTCCATGTGGCCAGTGGCTACTTTAGAAGCAGAAGTTATTCTCTGCAGAAACAGGACAGGAACACAGTATTTTATTTTAAAGTTAGCTGGGAAGTGGCCAGTAAAAGTTATACACACTG     |
| 176861_8776144_HIV1-ConN_1_36 | 4165   | 4285 | GATAAATGGACCCCAATTTCCACTAGTGCCACTGTAAAAGCAGCCGTGTGGTGGGCAAAATATCAAAACAGGAATTCGGGATACCCCTACAATCTCACAAGTCAGGGAGCAGTAGCTCCATGAAT |
| 176861_8776144_HIV1-ConN_1_37 | 4284   | 4404 | TAAAGAATTAGAAAAAATTTAGGACAATCAGAGATCAAGCAGAGTCACTAAAAACAGCAGTGCAAAATGGCGGTTTTCATTCCAAATTTTAAAGAGAAAGGGGGGTTTGGGGGTTACAC       |
| 176861_8776144_HIV1-ConN_1_38 | 4403   | 4523 | CTGCAGGGGAAAGAATAATAGACATAATAGCAACAGACATACAGACAACAAAAATTTACAAACACAAATTTTAAAAGTTCAAATTTTTCGGGTTTATTACAGAGACAGCAGAGATCCCATTTT   |
| 176861_8776144_HIV1-ConN_1_39 | 4522   | 4642 | TGGAAAGGACCCAGCCAACTCTCTGTGAAAGGAGAGGGGGCAGTGGTAATCCAAGATAACGGGGATATAAAAGTAGTCCACAGTAGGAAAGCAAAAAATAATTAGGGATTATGGGAAACAG     |
| 176861_8776144_HIV1-ConN_1_40 | 4641   | 4761 | GATGGCAGGTGTGGTGTGTGTGGCAAGTGGACAGGATGAAATCAGGACATGGAAATGTATGTGTCTCAAAAAGGCAAAAGGGTGGTATTATAGACATCATTT                        |
| 176861_8776144_HIV1-ConN_1_41 | 4760   | 4880 | TATGAACAACAATCACTCCAAAATAAGTTCAAAGTACATATCCAGTAGGTGAGCGCAAGTAGTAGTGAATACCTTATTTGGGACATAACAACAGGAGAAGGCTTGGCATCTTAGAGATCT      |
| 176861_8776144_HIV1-ConN_1_42 | 4879   | 4999 | TGGAGTATCCATAGAATGGAGACTAAGAAAATACAAGACACAAGTTGATCCTGAAATGGCAGACAAGCTAATACATCTTTTATTATTTTAATTGTTTTACAGCCTCTGCCATAAGGCAAGC     |
| 176861_8776144_HIV1-ConN_1_43 | 4998   | 5118 | CGGTCTTAGGGAGACAGGATTATCTAGTGTGAATATCCAGCAGGGCACAACAGAGTAGGCGACTTACAATATCTAGACATAACAGCTGGGTGGGAGTAAGAAGAGAGAAGCCACCT          |
| 176861_8776144_HIV1-ConN_1_44 | 5117   | 5237 | TTACCTAGTGTGATCAAGTTAACAGAAATAGATGGAACAGCAGACAGAGACGAGGGCCACAGAGGGAAACCCCTATAATGAATGGGCACATAGAATTTATTAGAAATTTAAAAAATGAAG      |
| 176861_8776144_HIV1-ConN_1_45 | 5236   | 5356 | CGTGTGCGCATTTTCCAAGGATTTGGCTACATGGGTTAGGACAACACATCTATAACACATATTTGGAGACACCTGGGAGGGGGTAGAGCAATTTACAGATACATACAAATTTACTGTTT       |
| 176861_8776144_HIV1-ConN_1_46 | 5355   | 5475 | TATCCATTATAGGATTGGCTGCCAGCACAGCAGAATAGGGATTACTCTCAAAGGAGAAAGGAATGGAGGCGAGTAGACTCTAGATATAGAGCCTGGAATCATCCAGGAAGCCCAACCCAGCA    |
| 176861_8776144_HIV1-ConN_1_47 | 5474   | 5594 | ACAGCTTGCAATATTTGCTATGTAAAAAGATGTTGCTATCACTGTATGTGTTGTCTACAAAAGAAAGGCTTAGGCATCTCATATGGCAGGAAGAAGCGGAGTCAACGACGACGAAGCACTCT    |
| 176861_8776144_HIV1-ConN_1_48 | 5593   | 5713 | TAAAGAGCTAGAAGATCTAAGATCTCATACAGCAGTAGTAAAGCTGTATATGCTTGGGATTTAGTACGCTTAGGATAGCAATTAATATAGCAGTAAATATCTGGGT                    |
| 176861_8776144_HIV1-ConN_1_49 | 5712   | 5832 | TATTACTATATAAAGAATATAAGAAAAATAAATTCAGGAAAAATAAAACAAATAAGACAGAGAATAAGAGATAGAGCAGAAGATAGTGGCAATGAGAGTGATGGGGATGAGAGTGGT         |
| 176861_8776144_HIV1-ConN_1_50 | 5831   | 5951 | TTGGCCACTCTCTCTCTCTGTATAAGCTTGATAATTGGGTTCTGAACAACATTTGGGTAACAGTGTAATAGGAGTACCAAGTGTGAGAGACGCAGAGACAGTCTTTCTTCGCGCTTCAGA      |
| 176861_8776144_HIV1-ConN_1_51 | 5950   | 6070 | ATGCTAAAGCCCATAGTACAGAGGCTCACAACTCTGGGCCACAAGCATGTGTTCCCACTGATCCCAATCCACAAGAAAGTGTCTATTACCCAAATGTAACTGAAAATTTTAATATGTGGG      |
| 176861_8776144_HIV1-ConN_1_52 | 6069   | 6189 | GAAAATAGGATTGGCAGACAATAAGCAAGGACATTTAGCATTTATGGGAACAGAGCTTAAAGCCCTGTGTTTAAATTAACCCCAATATGTGTCTAATCTGTCTGTAAACATAGCAATGGG      |
| 176861_8776144_HIV1-ConN_1_53 | 6188   | 6308 | GAATAACAATGAGACAGTTACAACAAGGAATTTAGACATAGGAGACAAACAAATGAAAAATTTGCTCATTAATGCAACCACCTGAGATAAAAGATAAAAAGAAGCAAGTTTACTCTCTGTT     |
| 176861_8776144_HIV1-ConN_1_54 | 6307   | 6427 | TTTATGACAGAAGATGTAGTACCAATCAATGATGCAACTTAATAATAAAACATATAGGCTTAATAAATTTGTAATACCAAGCTGTGACACAGCTGTGCTTAAGACTCTCTTTTGAGCCAACTG   |
| 176861_8776144_HIV1-ConN_1_55 | 6426   | 6546 | CCAATACATCTACTGTGTCACCCAGGCTTTGCCATTATGAATGTGATTAAGAGAACTTTAGTGGAAATGGAAATGTAAAAATGTAAATGTACAAATGCACATAGCAATAGGAATAAGGCCA     |
| 176861_8776144_HIV1-ConN_1_56 | 6545   | 6665 | AGTGATATCACTACTGTGTTAATCTTAATGGAAGCTTAGATACAGATGATTTGTTTATTAGAAATGATAGTGTGGGAATCTGTGTGGTCAATGGAATGAGACAGTGTCAATAAATTTGTAC     |
| 176861_8776144_HIV1-ConN_1_57 | 6664   | 6784 | CAAGGCCAGGAATAATACAGAGGACAGGTCAGATAGGACCTGTCTATGACATTTTATAACATAGAGAAAATAGTAGGAGACATTAGACAAGCACACTGTAATGTCTTAAGAGAGATT         |
| 176861_8776144_HIV1-ConN_1_58 | 6783</ |      |                                                                                                                               |

|                                |      |      |                                                                                                                                 |
|--------------------------------|------|------|---------------------------------------------------------------------------------------------------------------------------------|
| 176861_8776144_HIV1-ConN_1_75  | 8806 | 8926 | GAAGAAGCTAATGAAGGAGACAACAATGCCCTCTTGCATCCCATATGTCAACATGGAGTAGATGATGATCACAAAGAAGTGCTGGTGTGGCGGTTTGACAGCTCCTTGGCAAGAAGACAC        |
| 176861_8776144_HIV1-ConN_1_76  | 8925 | 9045 | CGTAGCAAGAGAGCTGCATTCGGGACTTTTACAAGAACTGTGTGACAAGGGGACTTTACTGCTGACAAGGGACTTTACACTTGGGGACTTTCCGCGCAGGGACTTTCCAGGGAGGTGTGGTGTGG   |
| 176861_8776144_HIV1-ConN_1_77  | 9044 | 9164 | GGGGAGTGGCTTGCCCTCAGGCTGCATAAAAGCAGCCGCTTCTCGCTTGTAATGGGTCTCTCTTGCTGGACCAGATTAGAGTCTGGGAGCTCTCTGGGTACAGGGAAACCCCATGCTTAA        |
| 176861_8776144_HIV1-ConN_1_78  | 9163 | 9276 | AAGCCTCAATTAAGCTTGGCTTTAGTGTGCTTGTGCGCATTCATTCGTGAATCTGTTAGCTCTAGAGATCCCTGACACCATCTAGAGATGGAGTAAATCTCTTAGCA                     |
| 176861_8776145_N-5843-5988_1_1 | 1    | 120  | AGAAGATAGTGGCAATGAGAGTGATGGGGATGCAGAGTGGTGGGTGACAAGGAGAGTGTGGGGATGATGAGTGGTGGCCATTCTCTGTCTCTCTGATAAGCTCGATAATTGGGTCT            |
| 176861_8776146_N-5872-6021_1_1 | 1    | 120  | TGGGGATGCAGAGTGGTGGATGGGATGAAGAGTGGTGGTGTACTCTTCTATCTTCTAGTAGAGTCTTAATCAAGGTAATTTGGGTCTGAACAACATTTGGGTAAACGCTGACTATGGGGTA       |
| 176861_8776147_N-6001-6120_1_1 | 1    | 120  | TAACGATGTACTATTGAGGTACCGATTGGAGAGACGCAGAGACAGTCTTTCTTTCGCTCTTCAGATGCTTAAGGCCCATAGCTACAGAGGCTCACAACATCTGGGCCACACAGCATGTGTT       |
| 176861_8776148_N-6161-6280_1_1 | 1    | 120  | ACTAGAAAAATTTAATGTGGGAAAAATAAATGGCAGAAACAAATCAAGAGGACATTAATCAGTTTATGGGAACAAGAGCTTAAGAGCCCTGTGTTAAATTAACCCCATTTAGTTGTAACTA       |
| 176861_8776149_N-6284-6528_1_1 | 0    | 120  | TTTGTAACAATAGCAATGGGAATGTGACAGAGGGTAATGGAACATAACAGTAGCAGTGAAAAATGTGGCAAGGAATAGTGAGACAAGGAAAAACAATAGCCTAGACATAGGAGACAACAACAA     |
| 176861_8776149_N-6284-6528_1_2 | 119  | 239  | ATGAAAGATTTGCTCATTTCAATGCACAACCATGAGATAAAAGATAAAAAAGAACGAAGTTTACTCTCTGTTTATGCAAGAAGATGTAGTACCAATCAATGACAGTGCAGATGACAATATAAACCA  |
| 176861_8776150_N-6601-6720_1_1 | 1    | 120  | CAATTCAAATACCTATTGCTGCACCAACCCAGGCTTTGCCATTATGAAGATTAATGAAGAACTTTAGTGAAGATGGAAATGTAGTACTGTACAAATGCACATGGAATA                    |
| 176861_8776151_N-6747-6866_1_1 | 1    | 120  | CTAAATGGAAGCCTAGATACAGATGATATTGTTTATTAGGAATAGTAGTGATAGCAATACAGAGTGGTGATCTGTGTTGGTGAATGGAATAAAGACAGTGTCAATAAAATTGTACAAGGCCAGG    |
| 176861_8776152_N-7277-7396_1_1 | 1    | 120  | CAACATTAAGTGGCATGATTTCTAGAATATAGTGAAGATAGTAAAGTAGGGCACTGGCACAACACAGCAGCATATATCCCTCAGGAGGAAACATGGTTGATCTCTGGAGACAAGAGATTGACACA   |
| 176861_8776153_N-8581-8703_1_1 | 1    | 120  | TAGTAGGATGGCCAGCAGCTCAGAGAAAGAATGAGAAGGGCCAGACAACCTCAAGAAGACAGCAGCAGGAGCAGAGCAGCAGTAGGAGTAGGAGGAGCAGTTTCTCAAGACCTAGCTAATCGCA    |
| 176861_8776154_N-8791-8910_1_1 | 1    | 120  | GCTTTCCAGTACGCCCTCAGGTACCATTTAGGCCCAATGACCTATAAGACAGCTTTTGATCTTCTCTTCTTTTAAAGAAAAGGGGGGAGCTTAAGAGGGGTAGTTTGGTCTCAGAAAAGG        |
| 176861_8776155_HIV1-Con_O_1_1  | 0    | 120  | TGGATGGGTAAATTTACTCCCATAAAGAGACAGAGATCCTGGATCTTTGGGTGTATCACTACTCAGGGATTCTTCCCTGATTGGCAGAACTACACACCAGGACCAGGAACCGATTCCCAC        |
| 176861_8776155_HIV1-Con_O_1_2  | 119  | 239  | CTGACATTTGGATGGTTATTTAAAGCTAGTACCAAGTGTGAGAAGATGAGGCAGAAAGACTAGGAAATAAAGTGTGAGAGGGCTAGTCTCTCGTAGCCAGCTTTGTAACCATGGCTTTGAAGAT    |
| 176861_8776155_HIV1-Con_O_1_3  | 238  | 358  | TCAACACGGGGAATACTGAAATGGCAGTTTGTATAGATACATAGGCCAACCCCATGTTGCTATGATACATCCCCAGAGCTCTCCCCAAGGACTAAAACCTGCTGACCTGAAGATTGCTGT        |
| 176861_8776155_HIV1-Con_O_1_4  | 357  | 477  | GACACTCTCGGGAGCTTTCCAGCAAGACTGCTGACACTCGCGGGAGCTTTCCAGCGTGGGAGGATAGGGGCGGTTGCGGGAGTGGCTAACCTCAGATGCTGCATATAAGCAGAGGCTTTCT       |
| 176861_8776155_HIV1-Con_O_1_5  | 476  | 596  | CTGCTGTACCGGGTCTCGGTTAGAGGACCAGGCTGAGCCCGGGAGCTCCCTGGCCTCTAGCTGAACCCGCTGCTTAACGCTCAATAAAGCTTGCCCTTGAGTGAGAAGCAGTGTGTGCT         |
| 176861_8776155_HIV1-Con_O_1_6  | 595  | 715  | TCATCTGTTCAACCGCTGGTATCTAGAGATCCCTCAGATCAGTGAAGTGAAGCAAAAAATCTCTAGCAGTGGCCGCCCAAGCAGGAGCTTGAAAGAGAAAGTGAACACGGAGAGAAACCC        |
| 176861_8776155_HIV1-Con_O_1_7  | 714  | 834  | CTCCGACGCCAACCGGCTCGGCTTAGCGGAGTGCACCCGCTAAGAGGCGAGAGAACTACAGAGGGTGAGTAAATTTGCTGGCGGTCGCCAGACCTAGGGGAAGGCGGAGGACTCTTAGGG        |
| 176861_8776155_HIV1-Con_O_1_8  | 833  | 953  | GGAGGAAGATGGGTGCGAGAGCGTCTGTGTTGACAGGAGCAAAATGGATGCATGGGAACAAATTAGGTTAAAGCCAGGATCTAAAAGAAATATAGGCTAAAAACATTTAGTATGTGGCAA        |
| 176861_8776155_HIV1-Con_O_1_9  | 952  | 1072 | AGCAGGGAGCTGGAAGAAGTTTGCATGTAAATCCTGAGCTACAGTAAACCTGACAGAGGTAATGAGAAATGTTACAGCAGTTAGAGCCAGCTCTCAAGACAGGGGTGAGAAAGAGAGAAACCC     |
| 176861_8776155_HIV1-Con_O_1_10 | 1071 | 1191 | ACTCTGGAACACAATAGCAGTGCTCTGGTGTGTTCAACAACAGATATAAAAGTGAAGATACGCAGCAGGCAATACAAAAGTTAAAGGGAAGTATGGGGAGCAGGAAGTCTGCAGGTGCCCG       |
| 176861_8776155_HIV1-Con_O_1_11 | 1190 | 1310 | CTAAGGAAGACACAAGCGCAGAGCAGAGCTCAAAATTTACCTGTAGTATACCAATGCGCAAGATCGGTACCAATGGCTACCGCCCTCTCCCGAGAGCTTTAAATGCTATGGGTAAAGGACG       |
| 176861_8776155_HIV1-Con_O_1_12 | 1309 | 1429 | GTAGAAGAAAAGGCCCTTTAAACCCTGAAATCATTCTTATGTTTATGTCATGCGATTGTGAGAGGGAGCTATTCCCTATGATATTAATACTATGCTAAATGCCATAGGAGGACATCAAGGGGCTTTA |
| 176861_8776155_HIV1-Con_O_1_13 | 1428 | 1548 | ACAAGTGCTAAAGGAAGTAAATCAATGAGGAAGCAGCAGATTGGGATAGAATCACCACACAGCGGTAGGGCCGTTACCACCAGGGCGAGATAAGGGAACCAACAGGAAGTGACATTGCTGG       |
| 176861_8776155_HIV1-Con_O_1_14 | 1547 | 1667 | GACAACTATGACCCACGCAAGAGCAAGTTTCACTGGATTACCAAGGGCCACAACCACTATCCCCAGTAGGAGACATCTATAGAAAATGGATGTAGGACTAAACAAAATGGTAAAAAATGGT       |
| 176861_8776155_HIV1-Con_O_1_15 | 1666 | 1786 | TAAGCTCCAGTGAGCATCTTAGATATTAACAGGGGACCAACGAAGCACTTTAGAGACTTGTAGATCGGTTCTACAAAAGCTTAAGAGCTGAGCAAGCTCAAGAAGTAAAAAATGGG            |
| 176861_8776155_HIV1-Con_O_1_16 | 1785 | 1905 | GATGACAGAAAACCTGCTTGTGTTCAAAATGCCAACCCAGATTGCAACACAGATTTTGAATCATTAGGGCCAGGAGCTACCTTAGAAGAGATGATGGTAGCCTGTGTCAGGGAGTAGGAGGACC    |
| 176861_8776155_HIV1-Con_O_1_17 | 1904 | 2024 | CACCTCATAGGGCCAGCATATAGCAGAAGCAATGGCTACAGCCAGCAGAGATCTAAAAGGAGGATACACAGCAGTATCTATGCAAAAGGGGCAAAAACCCCAATTAGGAAGAGGGCCTATAAA     |
| 176861_8776155_HIV1-Con_O_1_18 | 2023 | 2143 | AAATGTTTCAACTGTGGAAAAGGGGACATATAGCAAAAAATTTGCGACACCTTAGAAAGAAAGTTGCTGGAAATGTGGACAGGAAGGTACCAAAATGAAAGATTGCAAGAAATGGAATA         |
| 176861_8776155_HIV1-Con_O_1_19 | 2142 | 2262 | CAGCGCAAAATTTTGTAGCAAAATCTGGCTCCGGGGGGCAGAGGCCAGGCAATTTATGTGCGAAGAACAGTGCCTCCCAAGGCCCAATGGAGGAGGTAAATGAGGGACAGAGAA              |
| 176861_8776155_HIV1-Con_O_1_20 | 2261 | 2381 | ATCAGGAACAGAGGGGGGACCCGAACGAATCTATCCGTTTGCCTCCCTCAAATCCCTCTTTGGGACAGACCAGTAGTCAACAGCAAGG                                        |

|                                |      |                                                                                                                                      |
|--------------------------------|------|--------------------------------------------------------------------------------------------------------------------------------------|
| 176861_8776155_HIV1-Con_0_1_38 | 4403 | 4523 TCCTAAATGTCATATAAAAGGGGAAGCAATTCATGGTCAGGTAGACTGCAGTCCAGAAGTATGGCAATGGATTGCACACATTAGAAAGGCAAGTCTAATAGTTGCTGTCCATGTGCG           |
| 176861_8776155_HIV1-Con_0_1_39 | 4522 | 4642 CAAGTGGATTTCATAGAAGCAGAAGTGATACACAGCAGAAACAGGACAGAAACTGCCTACTTCCTGTTAAAAATTAGCAGCAGAGATGGCCTGTGTAAGGTAAATACATACAGACAATGGGCCTTA  |
| 176861_8776155_HIV1-Con_0_1_40 | 4641 | 4761 AATTTTACAAGTGCAACCATGAAGGCTGCATGTTGGTGGCAACATATAAACCATGAGTTTGGAAATACCATATAATATCCACAAGGTCAGAGGTAGTAGAAGACCATGAATAAGGAATTTAAAA    |
| 176861_8776155_HIV1-Con_0_1_41 | 4760 | 4880 ATCAATTATACAGCGGTGAGGGAGCCAAAGCAGAACTATAAACACAGCATACAATTGGCAGATTTGTTCCAAATTTAAAAAGAAAGGGGGGCTAGTGGGGGTACCTGCAGGAGAAG            |
| 176861_8776155_HIV1-Con_0_1_42 | 4879 | 4999 GGATAATAGACATATTAGCATCACAATAACAAACACAGAAGTACAAAAACAAATTTTAAAAATTCAAAATTTTCGGGCTCTATTACAGAGACAGCAGAGACCCCTATTGGAAGGACCCGG        |
| 176861_8776155_HIV1-Con_0_1_43 | 4998 | 5118 GCACAGATCTCTGTGGAAGAGGTGAGGGAGCAGTAGTCATCATCAAGATAAAGGAGACATTAAGGTAGTACCAAGAAGAAAGGCAAAAATAATACAGAGATTATTGGAAGAACAGATGGCAGGTACT |
| 176861_8776155_HIV1-Con_0_1_44 | 5117 | 5237 TGATAGTATGGCAAGTGGACAGACAGCAAGTGAAGGCTGGAACAGCCTGGTGGAAATACCATAAGTACAGGCTTAGGAAGACCAAGGACTGGTATTACAGACATCATTTAGTAATCTAGT        |
| 176861_8776155_HIV1-Con_0_1_45 | 5236 | 5356 AATCCAGAGTCAGTTTCAGGTGTATATATTCAGTAGGGGCACTGTGATAGGAGTACACATATTGGGGAGTTAGCGGAGGAAAGAGATGAACATTGGGCATTTGGGGTTTAGTATATA           |
| 176861_8776155_HIV1-Con_0_1_46 | 5355 | 5475 AGAATGGCAGTACAAGAAGTATAAAACACAGATTGACCCGAAACAGCAGACAGGATGATACATCTGTATTATTTCACCTGTTTTCAGAGTCAGCAATCAGGAAAGCCATCTTAGGGCA          |
| 176861_8776155_HIV1-Con_0_1_47 | 5474 | 5594 AGAGAGTATGTCACCAAGTGTAATACCTCCAGGACATAGTCAGTATAGGAGCACTGCAACTACTAGCTCTAAGAGCAGTAGTAAAGAGAAAAAGAAATAGCCCTCCCTCCACCGATGCTCC       |
| 176861_8776155_HIV1-Con_0_1_48 | 5593 | 5713 CAGAAATTAACAGAAGTAGATAGAACAGGCACCTGAGGATCAGGGACAGCTAGGAGGCCATTCAATGAATGGGCCTAGAGCTCTTAGAAGAGCTTAAAGCGTAGAAGCAGATAGAACATT        |
| 176861_8776155_HIV1-Con_0_1_49 | 5712 | 5832 TTCCCTAGGCCTTGGCTACAAGCCTTGGGCAATAACATTTATGAGACTTATGGAGACATTTGGTAGGAGTTTATGGCAATTATAAGAATCTTACAACAACTGCTATTTACCCATTTTATAGA      |
| 176861_8776155_HIV1-Con_0_1_50 | 5831 | 5951 AATTGGATGCCAACATATAGTAGAATAGGAATTAACCCATCTAACACAGAGGAAGAGGAAGAAGAAATGGATCCAGTAGACTCTTGAGATGCCCCCTTGGCATCACCTCGGAAGTACAGCCCT     |
| 176861_8776155_HIV1-Con_0_1_51 | 5950 | 6070 CAGACCCCTTGTAATAATTGCTATTGCAAAAAATGCTGCTATCATTTGCTATGTTTGTTCACAAGCAAGGGTTTGGGAATCTCCCTATGGCAGGAAGAACGACGACGACCCAGCAGCTGCT       |
| 176861_8776155_HIV1-Con_0_1_52 | 6069 | 6189 TGCAGGCCATCCAGATAATAAAGATCTCTACAGACAGTAGTAAGTAAAGCTAATGCATATAGGGACCTGCTAATATTAATAATTATTAGTCTTTGGCTGTTTAAATAGTAACTTCTAGT         |
| 176861_8776155_HIV1-Con_0_1_53 | 6188 | 6308 GGTGTTTATTCTTAGAAAAATTTTAGAACAAGAAAGAAACAGACAGAGGGAAAGAGAAATACTTGAAGGTTTAAAGAAATAAGAGAAATTAGGGATGACAGTGACTATGAAGCAATG           |
| 176861_8776155_HIV1-Con_0_1_54 | 6307 | 6427 GGAGAAGAAAGCAAGAGATTATGGATCTTGTGCATAGTCATGGCTTTGATAATCCCATGTTTGAGCTCTAACAGCTGTATGCAACAGCTCTATGCTGGGGTGCCTGTATGGGAAGATGC         |
| 176861_8776155_HIV1-Con_0_1_55 | 6426 | 6546 CAACCCCGATTATTTCTGTGCTTCAGATGCTAACCTAACAGCACTGAGCAGCATATAATTTTGGGCATCAACAGCTGTGCTCCCAAGCACCCTCCACATGAATATCCATTAAACA             |
| 176861_8776155_HIV1-Con_0_1_56 | 6545 | 6665 AATGTGCAGATAGATTTAATATATGAAAAAATTACATGGTAGAAAAAATGAGGAGCAAGATTAATAGTTTATGGGAACAGATTAAAAACCTTTGGTTCTCAATGACTTTCTGGTGTGTA         |
| 176861_8776155_HIV1-Con_0_1_57 | 6664 | 6784 ACAATGAATTGTACAGACGTAGCTGGAACAACAATGAAACCCCTATGAAAAAGTGTGAGTTTAAATGTAAACACAGTTCTCAAAGACAAAAGGAGAAAAACAGGCTCTATTCTATGT           |
| 176861_8776155_HIV1-Con_0_1_58 | 6783 | 6903 TATCAGATTTGATTAAAAATGAATGAGACAAGCAGACAAATAGACACAACAGCAAAATGTATACATTAATTAATTTGTAACCTCCACAACCATCAAGCAGCCGTGTCCAAAGGTATCTTTTG      |
| 176861_8776155_HIV1-Con_0_1_59 | 6902 | 7022 GAGCCAAATCCAATACATATTGTGCTCCAGCAGGATATGCCATCTTTTAAGTGTAAACAACAGAAATTAATGGAACAGGCACATGCAACAACATTACAGTAGATTCTGTACATGCTGCG         |
| 176861_8776155_HIV1-Con_0_1_60 | 7021 | 7141 CATCAAGCAACAGTAGTACTCACTAATTAATTAATGGGACCTCTTAAGGAAAAAATAAGAAATTTAGTGGAAAAAATTTCAGACAGTGGAAAAAATATCATATAGTACCCCTAAATCT          |
| 176861_8776155_HIV1-Con_0_1_61 | 7140 | 7260 CTACTATAAACATGACCTGTGAGAGACCCAGAAATCAGACAGTACAAGAGATAAAAAATAGGTCCAATGGCCTGTGACAGCATGGGCTTAGAGAAGACACAAACACATCCAACCTCAAGGA       |
| 176861_8776155_HIV1-Con_0_1_62 | 7259 | 7379 ATAGTATTATGGCAAGTATAATACCACCTGATTTGGGAAAAAGCCTTAAAAACAACAGCTGAAAGGTTATTTAGAACCTTGTAACAGATACAGATAATGTTAGACATTAATCAATAGCAGCAT     |
| 176861_8776155_HIV1-Con_0_1_63 | 7378 | 7498 TGGTGAGATCCAGAGATAACCCATTGTCATTTAATCTGTGCAGGAATCTTTTATTAACATCATTAAGATCTCAAGATGTTTAAATATACCTTTTACATGTGAAGGAAACCACTGTAATAGTAA     |
| 176861_8776155_HIV1-Con_0_1_64 | 7497 | 7617 ATGTTAGTCAAGGTAACAATGGCAATAATAAGATACCTTGCAGGATGAAACAGGTAGTAAGGTATGGATGAGGGGAGGGTCAAGGACTCTATGCACCTCCCATCAAAGGTAACCTAACAT        |
| 176861_8776155_HIV1-Con_0_1_65 | 7616 | 7736 TGTAGATCAACATAACTTGAATGATTTCTACAAATGGATAAGCCATGGAACAACAGCAACAACAATGGCCACATTAGACCAATAGGGGGAGATATGAAGATATATGGAGAACTGAATTG         |
| 176861_8776155_HIV1-Con_0_1_66 | 7735 | 7855 GTTCAACTACAAAGTAGTAAGGTAAAAACCTTTTAGTGTGGCACTACAAAAATGCAAGGCGGACATAGGCAGCTGGCCTATAGAGAAAAAGAGCAGTAGGATTGGGAATGCTATT             |
| 176861_8776155_HIV1-Con_0_1_67 | 7854 | 7974 TCTTGGGGGTCTTAAGTGCAGCAGGTAGCATTTGGGCGCAGGGCAACAGCGCTGACGCGTACAGACCACATTTGATAAAGGGTATAGTGCACAGCAGGACCACTGCTAAGAGCAA             |
| 176861_8776155_HIV1-Con_0_1_68 | 7973 | 8093 ATACAGGCCAGCAGCAATTGCTGAGGCTATCTGTATGGGGTATCAGACAACCTCCGAGCTCGCCTGCTAGCCTTAGAAACCTTAATACAGAAATCAGCAACTCCTAAACCTATGGGGCTGT       |
| 176861_8776155_HIV1-Con_0_1_69 | 8092 | 8212 TAAGGGAGGCTATATCTGCTACACATCAGTAAAAATGGAACAAAACATGGATAGGAAATGAAACAAATTGGGACACCACTAACATGGCAGGAATGGGATCAGCAGATAAACAACATAGGCTC      |
| 176861_8776155_HIV1-Con_0_1_70 | 8211 | 8331 CCATCATATATGATGAAATACAAAGGCGACAAGTACAGCAGAAACAAATAGAGAAATGAGAAATGCTGTGGAGTTAGATGAAATGGGCTCTTAATTGGAAATGGCTTGACATACCTAAATGGTTG   |
| 176861_8776155_HIV1-Con_0_1_71 | 8330 | 8450 TGGTATATAAAATCAGCAATAATCATAGTAGGAGCACTAATAGGTGTGAGAAATGTGATAGTACTTAATCTTAGTAGAGAAACATAGGAGGGATATCAACCCCTCTGTTACAGACT            |
| 176861_8776155_HIV1-Con_0_1_72 | 8449 | 8569 CCCATCCATCACAACCCGGAAGCAGAAACGCCAGGAGGAACAGGAGAAGGAGGTGAGAGAAGAGGCAGGCCAGGTTGATACCCTTCGCCCAAGAGGATCTTGCCACTGTTGTACACGGA         |
| 176861_8776155_HIV1-Con_0_1_73 | 8568 | 8688 ACCTTCAGACAATAATCTTGTGGAGTTACCACCTCTTGAGCAACTTAGCATCAGGATCCAGAAAGTGTACAGGCATCTGGGACTTGGACTGTGGATCTTAGGCAGAGAAGTAATTTAGT         |
| 176861_8776155_HIV1-Con_0_1_74 | 8687 |                                                                                                                                      |

|                                     |      |      |                                                                                                                              |
|-------------------------------------|------|------|------------------------------------------------------------------------------------------------------------------------------|
| 176861_8776159_ConO_6859-7151_1_2   | 121  | 240  | GTGACTTTAATGTAACCACAGTTGTCAAAGACAAAAGGAGCAAAAACAGGCTCTATTCTATAAATCAGATTTGATGGAAATAACAGATAAAAAATAAGAAAAACAATACACAGAAAATC      |
| 176861_8776160_ConO_6864-7153_1_1   | 0    | 120  | GAATTTGTACAGACTTTAAAACAAACGACCCCTCTACCTCCCCACCTACCTCGCTCCCTTAGCGGGTTTCAGAGAACCCTATGAAAAAATGTGAGTTTAAATGTAAACACAGTTCTCAAAGACA |
| 176861_8776160_ConO_6864-7153_1_2   | 119  | 239  | AAAAGGAGAAAAACACAGGCTCTATTCTATATATCAGAGTTGGTTAAAGTGAATGATAGCGAACAAGTAAAGGGAAATAATAGCGAAACAAGTAAACCAACACACCTCAGGAATAT         |
| 176861_8776161_ConO_7161-7280_1_1   | 1    | 120  | ATAAATTTGTAAGTCCACAACCATTAAGCAAGCCCTGTCCAAAGGTATCTTTTGAGCCAATTTCCAATACACTATTGTGCTCCAGCAGGATATGCCATCTTTTAAGTGTAAACAACAGAAAT   |
| 176861_8776162_ConO_7280-7399_1_1   | 1    | 120  | TAATGGAAACAGGCACATGCAACAACATTACAGTAGTTACTTTGTACACATGGCATCAAGCCAACAGTAAGTACTCAACTAATATTAAATGGGACACTCTCTAAAGGAAAAATAAGAATTA    |
| 176861_8776163_ConO_7534-7790_1_1   | 0    | 120  | TGGGTCAGTATGGCAGCTAAAAACAGAGTCAAGAACACAGGGTCAAGGATAGCTTTATTGTATGTATAATAACACTGAATGGATAAAATACCTTTAAACAAACAGCTGAAAGATATTTAGAA   |
| 176861_8776163_ConO_7534-7790_1_2   | 119  | 239  | ACTCGTAAACAAGACAGGAAATTTAAGCAAGACAGGAAATTTTAGCATAATATTCAACCACAGTATAAGTGGTGGAGACATAGAAGCAAGCTCTTACATTTTAACTGTCTATGGAGAATT     |
| 176861_8776164_ConO_7534-7799_1_1   | 0    | 120  | TGGCTCAGCATGGGCATAAGGGAAGAAAGTAAAAATACAAATGCCTCAAGGAGGGCTTTATTGCAAAATTTAATACCAGTGCCTGGATAGAAACCTTTAAAGGAACAGCTGAAAGGTATCTA   |
| 176861_8776164_ConO_7534-7799_1_2   | 119  | 239  | AGAGCTTGTAGAAGCAAAATAAACAGAGAATATTAGCATGATGTTTGATAGAAGTGATCTTGGTGGAGATCCAGAGATAACCCATTTGCATTTTAACTGTCTATGGAGAGTCTTTTATTG     |
| 176861_8776165_ConO_7825-8099_1_1   | 0    | 120  | ACCTTTTACATGTAACAAAACCAACTGCACATAACAATAGGACTGATAATAGCACTAATGACACAATACCTTGCAAGTTGAGACAGGTAGTGAGGTCTATGGATACAGGGGGGGTCAGGACTC  |
| 176861_8776165_ConO_7825-8099_1_2   | 119  | 239  | CTATGCCCCCTCCCATCAAGGTACCCCTAACATGTATGTCAACACATAACTGGAGTATCTTAGAAATGGAAACCGTCTATGGAACGGGAGTGTACAAGGACATTAAATGCTACATGGAACT    |
| 176861_8776166_ConO_7825-8102_1_1   | 0    | 120  | AACCTTTTATGTAACAAAACCAACTGTACAAATAGCCAAAATAACAGTCAAAGTTACAATAGCACTGAGAGACTGAAATTTGGGTTTGATACCTTGCAAAAATAAACAGGTAGTAAGGTCA    |
| 176861_8776166_ConO_7825-8102_1_2   | 119  | 239  | ATGGATGAAGGGGAGAGTCAGGACTCTATGCACTCCCATCCAGGTAACTTCAACATGTCAGTCAAAACATAACTGGAATGATTCTACAATAAGATGTGCCATGGAATAAAGCCATGGCAA     |
| 176861_8776167_ConO_7831-8099_1_1   | 0    | 120  | TCTTGTAACAATTCACCTGTCCAGAACATGTCTGGCAGTGACACTTCTAGCAATGACACTATACCTTGCAGGTTGAAACAGATAGTAAGTCTATGGATAGGGGGAGAGTCGGGATTCTAT     |
| 176861_8776167_ConO_7831-8099_1_2   | 119  | 239  | TGCACCTCCCATCAAGGTCGCCCTAAATTTGCACCTTCAAAATAGCTGGAATTTTACAATGGACTTCTCATGGAAACAACACAGAGGGGAAGCGTAAAGCTGACAGGAATGGGATCAAC      |
| 176861_8776168_ConO_8270-8389_1_1   | 1    | 120  | GGGAATGCTATTCTTTGGGGGTTCTAAGTGCAGCAGGTAGCACTATGGGCGCAGCGGCAACAGCGCTGACGGTACAGACCCACACTTTTGATAAAGGGTATAGTGCAACACAGCAGGACAACC  |
| 176861_8776169_ConO_8524-8658_1_1   | 1    | 120  | GAAAGCTCATCTGCTACACATCAGTACAATGGAAACACAACATGGACACCCAGGTAGATGGAAACAGAGGAGGGGATGGACGCAATCTGGGGCAACCTGACATGGCAGGAATGGGATCAG     |
| 176861_8776170_ConO_8524-8673_1_1   | 1    | 120  | GAAACCTAATTTGCTACACATCAGTACAATGGAAATAGACATGGAGCCCTGGTACTAATGAAGAAAGCATTTTGGGAGAACCTGACATGGCAGGAATGGGATCAACAGATAAGCAACATA     |
| 176861_8776171_ConO_8524-8661_1_1   | 1    | 120  | GACAATTAGTCTGCTACACATCAGTAAAAATGGAAACACAACATGGGGAGCAATATTCCATAATTACTAATCTGGAGGAAATTTGGGGCAAACTAACCTGGCAGGAATGGGATCAGAG       |
| 176861_8776172_ConO_8770-8889_1_1   | 1    | 120  | ATTGGCTTGACATAACTAAATGGTTGTGGTATATAAAAAATAGCAATAATCATAGTAGGAGCACTAATAGGTGTGAGAATTGTATGATAGTACTTAATCTAGTGAGAAACATTAGGCAG      |
| 176861_8776173_ConO_9397-9522_1_1   | 1    | 120  | GGGCATCAGTGAGAGAAAGAATAGAAAAAATAGAACCATTAGAACTAGAACTTCCCCCTGAGTCTGAACAGCAGCACCTGGAGTAGGAGCAGTCTCCAGAGCATTAGCAGCTAGAGGA       |
| 176861_8776174_ConO_9397-9537_1_1   | 1    | 120  | GGGCAGCAGTAAGAGAAAGAATGAGAAGAACTAGAACTTTCCTTGAGTCTGAACCATGCGCACCTGGAGTAGGACAGATCTCCAGGGAATTAGCAGCTAGAGGAGGGATACCAAGTTCC      |
| 176861_8776175_ConO_9397-9534_1_1   | 1    | 120  | GCTCAGAAAGTAAGAGAAAGAATAAGAGAGAGCTCACAGTGATCACAGTGATCTTGAACCATGTGCACCTGGAGTAGGAGAACTCTCCAGGGAACCTAGCAGCTAGAGGAGGAATACCAAGT   |
| 176861_8776176_ConO_9901-10021a_1_1 | 1    | 120  | TCCAGCTTGTAAATCATGGATTTGAGGATGCACACGGGGAGATACTAAAAATGGCAGTTTGATAGATCATTAGGCAGCACCCATGTAGCTATGATAACCCACCCAGAGCTCTTCCACAAGG    |
| 176861_8776177_ConO_9901-10021b_1_1 | 1    | 120  | TCCAGCTTGTAAATCATGGTTTTGAGGATGAACATGGAGAAGTCTAAAGTGGCAGTTTGATAGATCATTAGGCCTTAAATCATGTAGCCTTACAACCTGCACCCAGAGCTCTTCCCAAAG     |
| 176861_8776178_ConP_1_1             | 0    | 120  | TGGATGGGTTAATTTATTCACCTGGGAGACGAAATACTAGATCTCTGGATCTACATCAGCTAGGGGCTTCTCCCTGACTGGCAGCATCACTCCAGGGCAGGAGAAAGATTCCCAAC         |
| 176861_8776178_ConP_1_2             | 119  | 239  | CTGACCTTTGGGCTAGCTGTTTAAACTAGTACCGTCTCTGAGGTAGAAATTTGAGGAATGGGAGATGAGCAGGAGAAAGCTAAAGCTGCTACACTGCAGCTGCACCTTATGGGGATTTCAGAT  |
| 176861_8776178_ConP_1_3             | 238  | 358  | TCATCATAGGGAGATCTTAATGTGGAAGTTTGACAGATCACTGGGAGAAAGACATGTTGCCTTACAAAAGCACCCGGAAGTGTTTACTAAAGACTAAAGTGCTGACGCTACGCAGCTACT     |
| 176861_8776178_ConP_1_4             | 357  | 477  | TAAGTGTCTGACACTGCAGGGACTTTCCGGGGACGGAAAGTCCCGGGCGGGAACAGGGGAGGAGCAGGGGAGTGGTTTACCCCTCAGAGCTGCATATAAGCAGCTGCTTCAAGCTTGT       |
| 176861_8776178_ConP_1_5             | 476  | 596  | TACTGGGTCTCTGTGACAGACGAGATTAGAGCCTGGGAGCTCTTGGCCCTTAAGCAGAACCCATCGTCTGGAAAGCTCAATAAAGCTTCAAGTGTGATGAGTAAGCAGTGTGTGCTCATCT    |
| 176861_8776178_ConP_1_6             | 595  | 715  | TGTTTCAGAACTCTGGTGCTAGAGATCCCTCAGAGCACTTCTAGCCGAGTGGAAAAATCTCTAGCAGTGGCGCCCCGAACAGGGACTTGAAAGTGAAACCAGTTTCTGAATCCTCCGACGCA   |
| 176861_8776178_ConP_1_7             | 714  | 834  | ACGGGCTCGGCTCAGCGGAGTGCACCTGCTGAGAGGCGGAGAGGAGCTCACAGCGGTGAGTACATTTTGTGAGTGTGACTGACCTAGAGGAAGAGGGGAAGTCTTAGGGGAGGAGATG       |
| 176861_8776178_ConP_1_8             | 833  | 953  | GGGTGCGAGAGCGCTCAGTGTGACAGGGGGCCGATTGGATGCATGGGAAAGAATTAGGCTTAGGCCAGGAAGTAAGAAAAAATATAAGCTAAAAACATATAGTATGGGCAAGCAGAGAGCT    |
| 176861_8776178_ConP_1_9             | 952  | 1072 | TGGAAGATTGATGTATCTCTGGGCTTATGGAACACAGCAGAGGGTGTGCAAAAAATTATTAGAGCAGTTAGAACCCAGCTCTCAGAACAGGTTCTGATGGGCTCGAGTCTCTTTGGAACA     |
| 176861_8776178_ConP_1_10            | 1071 | 1191 | ACCCTAGTAGTTTTTATGGTGTGTTTACAAAAAGAGTAGATATAAGTGACACACAGCAGGCCATTACAAAAATGGAAGGAGGAAATCGAGAAAAAGAAAGAACATCAGAGGGCAGCACTGGA   |
| 176861_8776178_ConP_1_11            | 1190 | 1310 | AACAAGTCAAAAGTATCCTATTGTGCGAATGCCAGGGGCAAAATGACCCATATGCGCCTGTCTCCAGGACGCTGAATGCCTGGGTGAAGGCAGTAGAAGAAAGGCCTTCAACCCCTGA       |
| 176861_8776178_ConP_1_12            | 1309 | 1429 | AAATATCCCTATGTTTATGGCCTTGTGAGAAGGGGCTATACCTGATGACATCAATACTATGCTTAAATGCGATAGGCGGACATCAGGGAGCGTTGCAGGTGTTGAAAGAGGTAATTAATG     |
| 176861_8776178_ConP_1_13            | 1428 | 1548 | GAAAGAGGCTGCAAGATGGGATAGAACACATCCTGTTTCCAGTAGGACCATTACCACAGGGGAGCTTAGAGACCCCAACAGGAGGGGATATTGCAAGGAACCACTAGTACCAAGCAGGAACAG  |
| 176861_8776178_ConP_1_14            | 1547 | 1667 | GATAACCTGGATAACAAGGAACAATCCTATACCAGTAGGAGACATCTATAGAAAGTGATAGTGTGGGGCTCAATAAAGTGGTAAAAATGTACAGCCCCATTAGCATTTCTGGACATAAA      |
| 176861_8776178_ConP_1_15            | 1666 | 1786 | AGCAGGGACCTAAGGAACCATTTAGAGATTATGTAGATAGATTCTACAAAACCCCTCAGAGCAGAGCAAGCTAGTCAGGAAGTAAAGAGTTGGATGACAGACACCTTACTAATACAAAATG    |
| 176861_8776178_ConP_1_16            | 1785 | 1905 | GCTAATCCAGATTGTAAGCAGATTTTGAAAGCTCTGGGACCAGGTGCCACCTTAGAAGAAATGATGAATGCCTGTCAAGGAGTAGGGGGACCAACACATAAGGCCAGGGTCTTGGCAGAA     |
| 176861_8776178_ConP_1_17            | 1904 | 2024 | AGCTATGGCAGCAGATTAACTAAGCTAACCAAGAAATTAAGAGAGGTTTACAGAGTTTACAGAGTGGACAGAGAAAGCCAGTTAAAGTGCTTTAACTGTGGAAAGTAGGACACAT          |
| 176861_8776178_ConP_1_18            | 2023 | 2143 | TAGCAAGAACTGTAAAGCACCTAGGAGAAGAGGATGTTGGAAGTGTGGACAGGAAGGTCATCAAATGAAGACTGCAAAATCAGGAAGACAGGCAAAATTTTTAGGGAAGATCTGGCCTC      |
| 176861_8776178_ConP_1_19            | 2142 | 2262 | CCTGGGGGCAAGAGGCCAGGCAACTATGTACAGAAACAAGTACAAACGACAGCCCCACCTATGGAGGAGGACGAGATGACTCGGAACACAGCAGGGGAGGAAAAGGAGGACGAGAAAGAG     |
| 176861_8776178_ConP_1_20            | 2261 | 2381 | GTACCCCTTAGGCTCCCTCAGATCACTCTTTGGGACAGACCAGTAATACCAGTAAGAATAAGGGGGCATATTTGTGAGGCTCTATTAGATACAGGAGCTGATGACACAGTAGTAGATAAC     |
| 176861_8776178_ConP_1_21            | 2380 | 2500 | CTTACCTTTAGAAAGGAAGATGGAAACCAAAATGATAGGAGGAATAGGGGTTTTATAAAGTAAAGAAATTTGAAGAAAGTTAAGGTAGAAATAGAAGGAAGAGTTTATGGAACCTGT        |
| 176861_8776178_ConP_1_22            | 2499 | 2619 | TATTAGTGGGCCCCAACCCAGTAAATATAATAGGAAGAAATATTTTGACATTAATTGGATGTACTCTGAGTTTCCCCATCAGCTCCAAGAAATAGTACCAGTAAATTAAGGCAGGAA        |
| 176861_8776178_ConP_1_23            | 2618 | 2738 | ATGGATGGGCCTAGGGTAAAGCAATGGCCCTTGTCAAAGGAAAAAATAGAAAGCTTTAAGAGCCATTGTGCAAGAGATGGAACAGGAAGGAAAAAATACAAAAAATTTGGGCTGAAAATCCA   |
| 176861_8776178_ConP_1_24            | 2737 | 2857 | ATATAACACCCCATCTTTGCAATAAAAAAGAAAGATGGCAGCAAGTGGAGGAATTAGTAGACTACAGAACTAAATAAGAGAACACAAGATTTCTGGGAAGTACAATTTGGGAATCCAC       |
| 176861_8776178_ConP_1_25            | 2856 | 2976 | CTATCCAGGAGGTCTTAAGAAAAGGAAATCAGTGACCGTATTAGATGTTAGGTAGGGGATCTTATTCTCCTGTCTTATAGATCCAGATTTTAGAAAAATATACAGCTTTTCACTATACCTAGTG |
| 176861_8776178_ConP_1_26            | 2975 | 3095 | GTAATAATGAACACCAGGAATTAGATATGAGTATAATGTTCTGCCTCAGGATGGAAGGGATCACACGCCATCTTCCAGCATTCATGACTAAGATCTTAGAACCCCTTAGGGAGAGT         |
| 176861_8776178_ConP_1_27            | 3094 | 3214 | TAA'TCCAGAAGTAGAAATCTATCAATACATGGATGATCTATATGTAGGGTCAGATTTCGCTTTGTCTGAACATAGACAGCGGGTAGAGAACTTAGGGAAACACCTCTATGTATGGGGGT     |

|                          |      |                                                                                                                                     |
|--------------------------|------|-------------------------------------------------------------------------------------------------------------------------------------|
| 176861_8776178_ConP_1_28 | 3213 | 3333 TCACAACCTCCTGACAAAAACATCAAAGGAGCCTCCTTTCCTCTGGATGGGATATGAGCTCCATCCTGACAAAGTGACGGTGCAACCCATCATATTACCAGAAAAGGAAGGTTGGACAG        |
| 176861_8776178_ConP_1_29 | 3332 | 3452 GTAAATTGACATCCAGAAAGCTAGTAGGAAAGTTAAATTTGGGCAAGTCAAAATTTATCCAGGAATAAAGGTAAAGAGTTATGCAAACTAATTTAGGAGAACTAAATCTTCAACGAAGTAGTT    |
| 176861_8776178_ConP_1_30 | 3451 | 3571 TGCTCTTACTAGAGAGCAGAATTAGAACTAGAGGAAAATAAGAAATTTTAAAGAACAGCTGATCTGGAGTTATTACCAACCGAGAAAAGAAATTAATAGTAGACATACAGAAAGTAGG         |
| 176861_8776178_ConP_1_31 | 3570 | 3690 GAGCGGAGCAATGGACTTATCAGATATTTCCAGGAAGAACATAAAACCTTGAAAACAGGGAAATATGCCAGGCAAAAGGCTACTCACACCAATGATATAAGGCAACTGGCAGAAATATAC       |
| 176861_8776178_ConP_1_32 | 3689 | 3809 CAGAAGGCATCACAAGAAAGCATAGTGATATGGGGAAAACATACCCAAAGTTTAGACTACCAATAAATAGAAACGCTGTGGGAGACTTGGTGGTCAGACTATTGGCAAGCCACCTGGATACCT    |
| 176861_8776178_ConP_1_33 | 3808 | 3928 TGAATGGGAATTTGTTAGCACACCCCTCTTATTAAGCTCTGGTATCAGCTAGAAAAAGACCCCATACCAGGAATAGAAACCTTTTATGTAGATGGGGCAGCAAAACAGAGAGACCAAGTT       |
| 176861_8776178_ConP_1_34 | 3927 | 4047 TAGGCAAGCTGGATATGTAACAGATAGGGGTAGGCAGAAAGATAATCAAACCTAGAAAGAACCACTAATCAAAAAGCAGAAATTAGAAGCAGTGTGTTTAGCCTTAAAGAAATCAGGAAAAC     |
| 176861_8776178_ConP_1_35 | 4046 | 4166 CAGGCTAACATAGTAACAGACTCCCAATATGTGTTAGGGATCATCTCAGCAACTCCAGATCAAAGTGACTCCCCCTAGTGCAAAAAATAATAGAAGAAATGACAAAAAAGGAAAAGGTA        |
| 176861_8776178_ConP_1_36 | 4165 | 4285 ATACCTATCATGGGTACCAGCACAAAGGCATAGGGGGTAATGAAAATATAGATAAATTAGTCAGTAAAGACATTAGAAGAGTGTATTCTCGGAAGGCATAGACCAAGCACAGAGGA           |
| 176861_8776178_ConP_1_37 | 4284 | 4404 ATCATGAAAAATATCACAGTAATTGGAGAGCCCTAGCTAGTGACTTTGGCCCTTCCACCAATAGTGGCAAAAGAGATTATCAACAATTTGCCCAAAATGTCTATGTAAGGGGAAGCCATGC      |
| 176861_8776178_ConP_1_38 | 4403 | 4523 CATGGACAGGTAGACTGCAGTCCAGGAATTTGGCAACTGGACTGTACCACACGGAAGGAAAAATTTATCCTTGGCAGTCCATGTAGCCAGTGCCCTTCATGGAAGCAGAAATTAATCCCA       |
| 176861_8776178_ConP_1_39 | 4522 | 4642 AGCAGAAAACAGGACAAGAAGCTGCATATTTTGTGCTCAAATTTGGCATCAAGATGGCCTGTAAAAGTAATACACAGACAAATGGGCCCTAACTTTACTAGCGCTGCAGTAAAGGCAGCCTG     |
| 176861_8776178_ConP_1_40 | 4641 | 4761 GTTGGTGGCTTAATATACTCATGAGTTTGGGATACCCCTACAATCCCCAAAGTCAGGAGTAGTGGAAATCAATGAATAAGAAATTAAGAAAAATCATACATCAAGTACGAGATCAAGCTG       |
| 176861_8776178_ConP_1_41 | 4760 | 4880 GAGCACTTAAAGACAGCAGTTCAAATGGCAGTATTGTTTCACAATTTTAAAGAAAAGGGGGGTTGGGGGGTACACTGCTGGAGACAGGATCATAGATATTTCTGGCTACACAAATACAA        |
| 176861_8776178_ConP_1_42 | 4879 | 4999 AAGAACAGATTTACAAAACAAATTTTAAAAAATTCAAAATTTTCGGGTCTATTACAGAGACAGCAGACGCCCTATTGGAAAGGACAGCAGCAGCTCTGTGGAAAGGAGGAGGAGG            |
| 176861_8776178_ConP_1_43 | 4998 | 5118 TAGTCATACAAGACAAGGAGATATTAAGTAGTCCCTAGGAGAAAAGCAAAAATAATTAGAGATTATGGAAGAACAGATGGCAGGTGATGATTGTGTGGCAGATACCCAGAGAGAAAGTG        |
| 176861_8776178_ConP_1_44 | 5117 | 5237 GAAAGCCTGGAAAGCAGTCTGGTCAAATATCACAATATAGGTCTAAAAAGACAAGGAATTTGTTTTATAGGCATCATTATGAGACAATCCATCCTAGGATTAGTTTCAGGAGTTTACATTCC     |
| 176861_8776178_ConP_1_45 | 5236 | 5356 CAGTAGGAACAGCAACCATTATTGTGACTACTTATTGGGGGCTTATGCCCTGGGGAAAGAGAAGAACAAATTAGGACATGGAGCAAGTGTGGAGTGAGAGCAAGGTAAATACACCACACAGA     |
| 176861_8776178_ConP_1_46 | 5355 | 5475 ATAGATCCGAGAAACAGCAGATAGGCTAATTCATCTCCAGTACTTTTCAGATTTCGGCTGTGAGGAGGGCAATACTAGGGGACAGGGTATTGAACAAGTGTGAATACCTCAGCA             |
| 176861_8776178_ConP_1_47 | 5474 | 5594 AGGACATAGTCAGGTAGGCTCCTTGCAGTATTTAGCCTTAAAGTGGTAGTAGGGAAAGTAAAGGAAGGCCACCCCTCCCTAGTGTCCAGATATTGACACAAGACATATGGAGCAAGCC         |
| 176861_8776178_ConP_1_48 | 5593 | 5713 CCCAGAGGACCAAGGGCGCCACAGAGAGCCATTCAATGAGTGGATGCTACAAACCTTAGAGGAACCTCAAGGAGGAAGCAGTAAGACACTTCCCTATGCATTGCTTACACTCATTAGGACA      |
| 176861_8776178_ConP_1_49 | 5712 | 5832 AATACATCTATAATACCTTAGGGACACCTGGGAGGGAGTAACCTGCAATTATTAGGATCCTCAACAATAATTAATCTTTATCCATTATAGAATTGGATGCCACCATAGTAGAATAGGTATCT     |
| 176861_8776178_ConP_1_50 | 5831 | 5951 TTGCCACCCCTCTCGAAGAGGAAGGAGACATGGACCCAGTAGATCCTGACTGCCCTCCATGGCAACAGCCAGGGAGTCAGCCCTCAAGCCCATGTGAACAATTGTCTACTGCAAAAGCCTGCTG   |
| 176861_8776178_ConP_1_51 | 5950 | 6070 GCTATCATTGCTATGTTTGTGTTTCAAAAGAAGGTTTGGGAATCTCCTATGGCAGGAAGAAGCGACGAAAGACCTGCGAGAGCTGATAACAACAATCAGAATCATCAAGATCTGTATCAA       |
| 176861_8776178_ConP_1_52 | 6069 | 6189 AAGTAGTAAGTAGAAATAAAGTTGTATTATATGCATCCTAGGATAGGACAGTATTAAATAATAGCTGGGGTATTATTAATTTCAGTATAGTAGTTTGGGGGAGGTCCTGCTATTAGT          |
| 176861_8776178_ConP_1_53 | 6188 | 6308 TGCTAAAAGAGAGAGAAGGGATAAGTTTGTACAAAGCTAGCAAGGTGAGAGAAAAGGCAAGAAGATGAGGGGTATGAGAGTATGAAGAAGAAGAAGAACAGCTTAGGGAACTTGGGA          |
| 176861_8776178_ConP_1_54 | 6307 | 6427 AATCTGCTTGGCTTTGGTCTATACCTTTAATGCTATTAGTATGCTAGTGGAAACAGCTATGTTTACTGTATATTTATGGGGTTCCAGTTTGGAGAGATGCTAAAGTTACCTTATTTTTGTGC     |
| 176861_8776178_ConP_1_55 | 6426 | 6546 CAGCAGATGCATCGCTAACTAGCAAAGAGCAGCATATAATTGGGCCACCCAGGCCCTGTGTGCCACAGACCCCTACACCAATAGAGGTCCGGATAAATGTAAACAGAGTCTTTTAATATTT      |
| 176861_8776178_ConP_1_56 | 6545 | 6665 TGGGAAAATTATATGTTGACACAAATGCAGGAAGACATCATTTAGCTTATGGGATCAGAGCCCTTAAACCTTGTGTAAAATTGACAGTCCCTATGTGTTACTATGAATTGTAGTGAATGCCAC    |
| 176861_8776178_ConP_1_57 | 6664 | 6784 CAAGGAGGCTAACTGTATAATAAACAGTAGTCTCCTCTGAGAATGAGTACAGCCGCCCAATCCATTAGTCTATTAAAGTGCAGTTTAAATACAACCCACAGTATTGAAAGATAAAAAGCAGGA    |
| 176861_8776178_ConP_1_58 | 6783 | 6903 AACAGCAAGCACTCTTCTATAGAACAGACCTAATAGCACTGAATGAGACAGCAAAATAACACTATATAGATTAATTAATTGCAACACCCTACCATTACACAAGCATGCCCAAAAGTGA         |
| 176861_8776178_ConP_1_59 | 6902 | 7022 ACTTTTGAGCCACTACCCATACAGTATTGTGCACCAGCAGGGTATGCACTAATGAAATGCAATCAGAAAGGATTTAATGGTACAGGACCTTGTAAATCAGACAGTCATAACACACTGTACAC     |
| 176861_8776178_ConP_1_60 | 7021 | 7141 ACATGGAATTAAGCCAACAGTGTCAACACAATTGTACTCAATGGAACCTTAGCAGAGGGAGAGCCCTTAGTAATTACTCAAAATGTGCAGATACAAGAAATGTCATCATAGTAAAAAT         |
| 176861_8776178_ConP_1_61 | 7140 | 7260 TAAATGAGAATGTGTCACCTGCTGTAAGACCAGGTAATAACACAAGAGGACAAGTGCAACTAGGAGCCATGACATGGTATAATATGAAACTCTACGCGAGTGATATCAGGGAAGCTC          |
| 176861_8776178_ConP_1_62 | 7259 | 7379 CATTGTAACGTTTCTATGGAAAAATTGGACAGGAACCTTAGAATGTGTCAGTGAGGCCATCTGGAAGGCTTATCCTCAACCTCCCAACCATAACCATACATTTGTCTTTAGAAAACAGTACA     |
| 176861_8776178_ConP_1_63 | 7378 | 7498 AGGGGGAGACCCAGAGGTTTCTTCTCTGCACTTCAGTTGTGCATGGGGAATCTTTTATTTGTAACACAGCAGCCTGTTTAAATTATAGCTATACTTGTAAATGAGAAGGGGTATGCAAGTAT     |
| 176861_8776178_ConP_1_64 | 7497 | 7617 TCAATAATCATACAGGTAATCACACAGGTGAGAACATAATAACACTGCCTTGTAGACTAAAGCAAGTAGTTAATTCATGGATGAGAGTGGGATCAGGCTTGTGTCGCCACCTATCGAGG        |
| 176861_8776178_ConP_1_65 | 7616 | 7736 GGACAATTGCGATGCCACTCCAACATTACAGGTTTAATATTAGACAGAGGATCACCTTATAATGCCCAACAGCAGCAGCAACACCATTAAAGCCCTACAGGGGGAGAAATGAGACATATC       |
| 176861_8776178_ConP_1_66 | 7735 | 7855 CTGGAGAAGTGAGTTATATCCCTACAAGGTAGTTCAAGTAAAAGCTCTGGCTGTGGCACCTACAAGAGTCTCCAGACCTACAATCATGGCTCATGATGCTCATAGGAAAAAAGGGGAGC        |
| 176861_8776178_ConP_1_67 | 7854 | 7974 CAGCCTAGGAATGCTATTCTCTGGGTTTCTGAGTGCAGCAGGAAGCACTATGGCGCAGCGGGAGTCACGCTGACGGTACAGGCCAGGCAATATTGCATGGTATAGTGCAGCAGCAGA          |
| 176861_8776178_ConP_1_68 | 7973 | 8093 AACAAATATGCTAAGAGCTATAGAGGCACAGCAAGAATTGCTGAGACTCTCTGTGTGGGGCTATAAGACAGCTCCGAGCTCGCCTGCTTGCCATTGAAACCTACTTTAAGGGATCAGCAACTC    |
| 176861_8776178_ConP_1_69 | 8092 | 8212 CTAGGACTGTGGGGATGCTCAGGACAAATAGTATGTTTACTAATAGTGGCCATGAGACTGTCAGCAACAAAGTGAACCTGAATAGATGGCATTTGAAGTAACTTAAGGATGCGCA            |
| 176861_8776178_ConP_1_70 | 8211 | 8331 AGGAATGGGCAAACTGGTGGAATAATTACACTGACACAATTTATTGGAATAACAAGAGCACAAGAGCAACAGAAAGGCAATGAAAGAAAGTTATTAGAATTAGACCAATGGGCACAAT         |
| 176861_8776178_ConP_1_71 | 8330 | 8450 TTGTGGAGCTGGTTGGACATAACACAATGGTGTGGTACATAAAAAATTTTCATTATGATAGTAGGAGGAATTATAGGACTAAGAAATCTTATTGGCTATAGTTAATGTAGTCAGGAGAGTC      |
| 176861_8776178_ConP_1_72 | 8449 | 8569 CAGGCAGGGATACTCACCTGTATCGTTGCAGACCCCTTGGCCTGCACGGGACCCAGCAGGAATAGCACCAGGAACAGACGAAAGAGTGGAGAAGCAGGCAACGGCAGATCGATCAGATT        |
| 176861_8776178_ConP_1_73 | 8568 | 8688 TGCTGGACGGATTATTGGCTCTCGTCTGGGACGACCTGAGGAACCTGGTGGTGACGATACCAAGATATTAGTCGGCTGCATATTGAGGATCAAGGACCTCCTAACAAATCTGTGGATAC        |
| 176861_8776178_ConP_1_74 | 8687 | 8807 CACCTGGGCCAAGTCTGAACAGAGGGCTTAAGTGCCTGCGAGACTGCTTGTGCTGCTGTGGCTATTGGACTCAAGAATTAACAAAGTGAACACAGCTTGTGAGACTGTTGCTATA            |
| 176861_8776178_ConP_1_75 | 8806 | 8926 ATCAGTTGCAAGGTTGACTGTATCAAGTAATAGCAGTAGGGCAACAAATAGGAAGAGGCTTCTTGAACATACCAAGAAGGTTAAGACAAGGGATAGAAAAGAGCTTACTATAATGGGGAAT      |
| 176861_8776178_ConP_1_76 | 8925 | 9045 TGCATGGAAGAAAAGTAGCTTAGTGGGCTGGCCAGCAGTCAGGGAAGAAATAAATCAGACTACCCAGTAAACACCTGCATCCGGGGTGGGGAGATTTCCAAAGAATTAGCAACAAGGAAA       |
| 176861_8776178_ConP_1_77 | 9044 | 9164 AAGGAATACCCAGTAATTTAATTCAAAGAACAAATGCAGCATTAGCCATTAGCCTTCTTGAAGACTCATGAGGACGAAGAAGTAGGATTCCGAGTTAGGCCTCAAGTACCTTAAGACCCATGACAT |
| 176861_8776178_ConP_1_78 | 9163 | 9283 TACAAGGCAGCATTTGACCTCAGCTTCTTTTAAAGAAAAGGAGGAGACTGATGGGTTAATTTATTACCTGAGAGAGCAGAAATCCTAGATCTCTGGATCTATCACACTCAGGGATTTC         |
| 176861_8776178_ConP_1_79 | 9282 | 9402 CTTCCTTGACTGCGAGCATTACACTCCAGGGCCAGGAGAAAGATACCCCTGACCTTTGGGTGCTGTTTAAACTAGTACCAGTCTCTGAGGTAGAAGCTGAGGAAATGGGAGATGAGCA         |

|                                |      |      |                                                                                                                                |
|--------------------------------|------|------|--------------------------------------------------------------------------------------------------------------------------------|
| 176861_8776178_ConP_1_80       | 9401 | 9521 | AGGAGAAAGCTAAGCTGCTACATCCAGCCTGCACCTTATGGGTTTTTCAGATCATATAAGGAGATCTTAGTGTGGAAGTTTGACAGATCACTTGGAGGAAAACATGTTGCCTTACAAAAGC      |
| 176861_8776178_ConP_1_81       | 9520 | 9640 | GACCCGGAACCTGTTTATTAAGAGCTAAAGTGCTGACGCCACGCAGCATGCTTAAAGTTGCTGACATCGACGGAGCTTCCGGGGACGGAAGTCCCAGGCGGGAACAGGGGGAGGAGGACGG      |
| 176861_8776178_ConP_1_82       | 9639 | 9759 | GCCAGGTGGTTTACCCTCAGAGCTGCATATAAGCAGCTGCTTCACGTTGCTCTGTTGACAGCTCTCTGTGACAGCCAGATTTAGAGCCTGGGAGCTTCTGGTCTTAAAGCAAGACCCACTGCTTTG |
| 176861_8776178_ConP_1_83       | 9758 | 9873 | GGAAGCTCAATAAAGCTTGCCTTTGAGTGAGTAAAGCAGTGTGTGCTCATCTGTTTCAAGACTTCTGGTGTCTAGAGATCCCTCAGAGCACTTCTAGCCGAGTGGAAAAATCTCTAGCA        |
| 176861_8776179_P-6671-7034_1_1 | 0    | 120  | AGCGACTGCAGCACGGTTGACTGTACTAATAACTCCTCCAGGGTTAATAACAGCACCCGACAGCACCAACACAGCAAAACCAATCCATTAGAATTATTTTCAGTGCAGTTTATATACAACC      |
| 176861_8776179_P-6671-7034_1_2 | 119  | 239  | CACAATAGTAAAAAGATAAACAGCAGACACAGCAAGCACTCTTTTATAGAGCAGACCTAACAAAATTTGGATAATGACAATAGTACATATAGATTAAATTAATGCAACACCACTACCATTAC     |
| 176861_8776179_P-6671-7034_1_3 | 238  | 358  | CACAGGCATGCCAAAAGTGAACCTTTGAGCCGCTACCATAACAGTATTTGTGACACAGCAGGATGCACTAATGAAATGCAATCAGACAGGATTTAATGGTACAGGACCTTGTATAAGA         |
| 176861_8776180_P-7498-7874_1_1 | 0    | 120  | GTTTAACTTTAGTTATACTTGAATGACACCACCTGGCGGGCTGCAGGCAATCATAATACAAGTAAAAATATAACACTGTCTTTGAGACTGAAGCAAGTAGTTAAATTCATGGATGAGAGT       |
| 176861_8776180_P-7498-7874_1_2 | 119  | 239  | TGGGATCAGGCTTGTTTGCGACACCTATTGAGGGGGAATTAAGTGTCAATCCAACATTACAGGTTTAAATGTTAGAAAAGAGAACTACCTTACAATGACAGCAGCAAGAACACCACTTTAA      |
| 176861_8776180_P-7498-7874_1_3 | 238  | 358  | AGTCCTATAGGGGGAGACATGACAAATATCTGAGAGAAGTGAGTTATATCCCTACAAAGTAGTTCAAGTAAAAAGCTCTGGCCGTGGCACCTACAAAAATTTCCAGACCTACAATTTATGGCT    |
| 176861_8776181_HIV2-Con2A_1_1  | 0    | 120  | TGGAAGGATGTTTTACAGTGGAGAGAAGACATAGAATCCTAGACATATACTTAGAAAGGAAGAGGGATAAATCCAGATTGGCAGAAATATATCTCATGGCCAGGAGATTGAGCCATACCCAA     |
| 176861_8776181_HIV2-Con2A_1_2  | 119  | 239  | ATGTTCTTTTGGGTGGCTGTGGAAGCTAGTACCAGTAGACGCTCCCAAGAGGGAGAGGACGATGAGACCCACTGCTTAAATACCCAGCACAACAAGCAGGTATGATGACCCGCATGGG         |
| 176861_8776181_HIV2-Con2A_1_3  | 238  | 358  | GGAACACTAGTGTGGAGGTTTGACCCCATGCTGGCCTATAGAGTACAAGGCCTTTAATCTATACCCAGAGGAATTTGGGCACAAGTCAGGCTTGGCCAGAAGAAGAGTGAAGGCAAAACT       |
| 176861_8776181_HIV2-Con2A_1_4  | 357  | 477  | TGAAGCAAGAGGGATACCAATTTAGTTAAAGACAGGAACAGCTATCTTTGGTCAGGGCAGGAAGTAGCTACTGAAAACAGCTGAGACTGCAGGGACTTTCCAGAAGGGGCTGTAACCAAGG      |
| 176861_8776181_HIV2-Con2A_1_5  | 476  | 596  | GAGGGACATGGGAGGAGCTGGTGGGGAACGCCCTCATACTTTCGTATAAATGTACCCGCTGCTTGCATTTGACTTCAGTCGCTCGCGGAGGGCTGGCAGATTGAGCCATGAGCGAGG          |
| 176861_8776181_HIV2-Con2A_1_6  | 595  | 715  | GTTCTCTCCAGCACTAGCAGGTAGAGCCTGGGTGTTCCCTGCTAGACTCTCACCAGTGCTTGGCCGGCACTGGGCAGACGGCTCCACGCTTGCTTGCTTAAAGACCTCTTAATAAAGCTG       |
| 176861_8776181_HIV2-Con2A_1_7  | 714  | 834  | GCCAGTTAGAAAGCAAGTTAAGTGTGTGTTCCCATCTCTCCTAGTCGCCGCTGGTCATTTCGGTGTTCACCTGAGTAAACAAGACCTGGTCTGTAGGACCCCTCTTGCTTTGGGAAACCG       |
| 176861_8776181_HIV2-Con2A_1_8  | 833  | 953  | GAGGCAGGAAAATCCCTAGCAGGTTGGCGCCGAACAGGGACTTGAAGAAGACTGAGAAGCCTTGGAACACGGCTGAGTGAAGGCAGTAAGGGCGGCAGGAACAAACCACGACGGAGTGCA       |
| 176861_8776181_HIV2-Con2A_1_9  | 952  | 1072 | CTCTAGAAAGGGCGCGGCGCGAGATACCAAAGCGCGCGTGTGGAGCGGGAGTGAAGAAGGCTCCGGGTGAAGGTAAAGTACCTACACCAAAAACCTGTAGCCAGAAGGGCTTGTATCCT        |
| 176861_8776181_HIV2-Con2A_1_10 | 1071 | 1191 | TACCTTTAGACAGGTAGAAGATTGTGGGAGATGGCGCGGAGAACTCCGTCCTTGAGAGGGAAAAAAGCAGATGAATTAGAAAAAATTAGGTTACGGCCCGCGGGAAGAAAAATACAGG         |
| 176861_8776181_HIV2-Con2A_1_11 | 1190 | 1310 | GTTAAAAACATATTGTGTGGGCAGCGAATGAATTTGGACAGATTTCGGATTAGCAGAGAGCCTGTTGGAGTCAAAAGAAGGTTGCCAAAAAATTTCTACAGTTTATAGATCCATTAGTACCGAC   |
| 176861_8776181_HIV2-Con2A_1_12 | 1309 | 1429 | CAGGGTCAGAAAAATTTAAAAAGCCTTTTTTAATACTGTCTGCGTCATTTGGTGCATACACGCAGAGAAGAAAGTGAAGAATACTGAAGAAGCAAAAAAATAGTACAGAGACATCTAGTGT      |
| 176861_8776181_HIV2-Con2A_1_13 | 1428 | 1548 | GCAGAAACAGGAACCTCAGAGAGAAATGCCAAATACAAGTAGAACCAACAGCACCACTAGCGGGAAAGGAGGAACTTCCCGTACAAACAGTAGCGGCAACTATACCCATGTGCGCGTG         |
| 176861_8776181_HIV2-Con2A_1_14 | 1547 | 1667 | GAGTCCCGCAACCTAAATGCTTTGGTAAAATTAGTAGAGGAAAAGAAGTTCGGGGCAGAAGTAGTGCCAGGATTTTCAGGCACTCTCAGAAGGCTGCACGCCCTATGATATTAATCAAAT       |
| 176861_8776181_HIV2-Con2A_1_15 | 1666 | 1786 | TGCTTAATTGTGTGGCGGACCATCAAGCAGCTATGCAAATAATCAGGGAGATTATTAATGAAGAAGCAGCAGATTGGGATGCGCAACATCCAATACCAGGCCCCCTTACCAGCGGGGCAGC      |
| 176861_8776181_HIV2-Con2A_1_16 | 1785 | 1905 | CTTAGAGAACCAAGAGGCTGCATAGCAGGGACACAAAGCAGTAGAAGAACAGATTCCAGTGGATTGTTAGGCCACAAAATCCCTGTACCACTAGTAGAAACATCTATAGAAGATGGATC        |
| 176861_8776181_HIV2-Con2A_1_17 | 1904 | 2024 | CACAGATAGGCTCAGAAAGTGTGTACAGGATGTACAAACCCAAACCAACATCTCTAGACATAAAACAGGGACCAAGGAGGCGGTTCCAAAGCTATGTAGATAGATTCTACAAAAGCTTGAGGGC   |
| 176861_8776181_HIV2-Con2A_1_18 | 2023 | 2143 | CAGAACAAACAGATCCAGCAGTAAAGAAATTGGATGACCCAAACACTGCTAGTACAGAATGCCAACCCAGACTGTAAATTAGTACTAAAAGGACTAGGGATGAATCCTACCTTAGAAGAGA      |
| 176861_8776181_HIV2-Con2A_1_19 | 2142 | 2262 | ATGCTAACCGCCTGTGAGGGGTAGGTGGACCAAGCCAGGAAGCCAGATTATATGGCAGAAGCCTTAAAGGAGGCCATGGCACCAAGCCCCATCCCATTTGACAGCAGCCAGCAGAGAAGG       |
| 176861_8776181_HIV2-Con2A_1_20 | 2261 | 2381 | GACRAATTAAGTGGTGCACAAATTGTGGAAAGGAAGGACACTCGCGAAGACAATTCGAGCACTTAGAAGACAGGGCTGCTGGAATGTGGCAAGCAGGATCATATGGAACCTGCGCCAG         |
| 176861_8776181_HIV2-Con2A_1_21 | 2380 | 2500 | AAAGACAGGCGGGTTTTTTTAGGGATGGGCCCATGGGGAAGAAAGCCCGCAACTTCCCGCTGGGCCAAGTTCGCGAGGGGCTAACACCAACAGCACCCCCAGTAGATCCAGCAGTGGACC       |
| 176861_8776181_HIV2-Con2A_1_22 | 2499 | 2619 | CTACTGGAGAAATATATGTCAGCAAGGGAGAGAAAGCAGAGGGAGCAGAGAGAGAGACCATACAAAGAGGTGACAGAGAGGCTTACTGCACCTCGAGCAGGAGAGACCAATGACAGGAGACG     |
| 176861_8776181_HIV2-Con2A_1_23 | 2618 | 2738 | GACAGAGGACTTGCTGCACCTCAATTTCTCTCTTTGAAAAGACCAAGTAGTTCACAGCATACATTTAGGGGTGAGCCAGTGAAGTTTACTAGACACAGGGGCTGACGACTCAATAGTAGCA      |
| 176861_8776181_HIV2-Con2A_1_24 | 2737 | 2857 | AGGAATAGAGTTAGGGAGCAATTTATAGTCCAAAAATAGTAGGGGGAATAGGGGGATTTCATAAATACCAAAGAAATATAAAAATGTAGAAATAGAAGTATAAATAAAGGGTAAAGAGCCAC     |
| 176861_8776181_HIV2-Con2A_1_25 | 2856 | 2976 | CCATAATGACAGGTGATACCCCAATCAACATTTTTTGGCAGAAATATTCTGACAGCCTTAGGCATGTCAATTAATCTACCACTGCGCAAGATAGAACCAATAAAGTAATGCTGAAGCCAG       |
| 176861_8776181_HIV2-Con2A_1_26 | 2975 | 3095 | GGAAGAAGATGGACCAAACTGAGACAATGGCCCTTAACAAAAGAAAAAATAGAAGCACTAAAAGAAATCTGTGAAAAAATGGAAAAAGAGGGCCAGCTAGAGGAAGCACTCCAACATAAT       |
| 176861_8776181_HIV2-Con2A_1_27 | 3094 | 3214 | TCCTTTATAATACCCCCACATTTTGCAATCAAGAAAAAGGACAAAAACAAATGGAGGATGCTAATAGATTTTAGAGAACTAAACAAGGTAACCTCAAGATTTTCACAGAAATTCAGTTAGGAAT   |
| 176861_8776181_HIV2-Con2A_1_28 | 3213 | 3333 | TCCACACCCAGCAGGATTAGCCCAAGAGAAGAAATTAATCTGACTAGATGTAGGGGATGCTTACTTTTCCATACCCTACATGAAGATTTTAGACAGTATACTGCATTTACTCTACCAT         |
| 176861_8776181_HIV2-Con2A_1_29 | 3332 | 3452 | TCAGTAAACAATGCAGAACCAAGGAAAAAGATATATATATAAAGTCTTGCCACAGGGATGGAAGGGATCACCAAGCAATTTTTCAATACACAATGAGGCAGGTCTTAGAACCACTTCAGAAAA    |
| 176861_8776181_HIV2-Con2A_1_30 | 3451 | 3571 | AGCAAAACCCAGATGTCAATTATCATTTAGTACATGGATGATATCTTAATAGCTAGTGACAGGACAGATTTAGAACATGACAAAGTAGTCCTGCAGCTAAAGGAACCTCTCAATTTGGCCTAGG   |
| 176861_8776181_HIV2-Con2A_1_31 | 3570 | 3690 | GATTTTCTACCCAGATGAGAAGTTCCAAAAAGCCCTCCATCAACATGGATGGGCTATGAACCTGTGGCCAACCTAAATGGAAGCTGCAGAAAAATACAATTTGCCCAAAAAAGAGTATGGAA     |
| 176861_8776181_HIV2-Con2A_1_32 | 3689 | 3809 | ACAGTCAATGACATCCAAAAGCTAGTGGGTGCTTAAATTTGGGAGGAGCAACCAATCTACCCAGGGAATAAGAACCAACCACTTATGAGCTAATTAGAGGAAAAAATGACACTCACAGAAAC     |
| 176861_8776181_HIV2-Con2A_1_33 | 3808 | 3928 | AGTACAGTGGACAGAATTAGCAGAAGCAGAGCTAGAAGAAAAACAAATTTATCTTAAGCCAGGAACAAGAGGGACACTATTACCAAGAAGAAAAAGAAATTAGAAGCAACAGTCCAAAAAGA     |
| 176861_8776181_HIV2-Con2A_1_34 | 3927 | 4047 | ATCAAGACAATCAGTGGACATATAAAATACACAGGGAGAAAAAATTTCTAAAAGTAGGAATAATGCAAAAGATAAAAAATACCCATACCAATGGGGTCAGATTGTTAGCACAGGTAGTTTC      |
| 176861_8776181_HIV2-Con2A_1_35 | 4046 | 4166 | CAGAAAAATAGGAAAAGAAGCACTAGTCATTTGGGGACGAATACCAAAATTTTCCACTACCAGTAGAGAGAGAAAACTGGGAGCAGTGGTGGGATAACTACTGGCAAGTGACATGGATCCCA     |
| 176861_8776181_HIV2-Con2A_1_36 | 4165 | 4285 | AGACTGGGACTTCGTATCTACCCCACTGCTGAGTTAGCATTTAACCTAGTAAAAAGATCCCTAACAGGCGCAGAGACCTTCTACACAGATGGATTGCTGCAATAGGCAGTCAAAAGA          |
| 176861_8776181_HIV2-Con2A_1_37 | 4284 | 4404 | AAGGAAAAGCAGGATATGTAAACAGATAGAGGGAGAGACAAGGTAAGGTATTAGAGCAAACTACCAATCAGCAAGCAGAATTAGAAGCCTTTGCAATGGCACTAACAGACTCAGGTCCAA       |
| 176861_8776181_HIV2-Con2A_1_38 | 4403 | 4523 | AAAGTCAATATTATAGTAGACTTCACAGTATGTAAATGGGAATAGTAGCAGGCCAACCAACAGAGTCAGAAAGTAGAATAGTAAATCAAAATCAGTAGAGAAATGATAAAAAAGGAAGCAATC    |
| 176861_8776181_HIV2-Con2A_1_39 | 4522 | 4642 | CTATGTTGTCATGGGTCCAGCCCATAAAGGCATAGGAGGAAATCAGGAAGTAGATCAATTTAGTAAGTCAGGGCATCAGACAAGTATTGTTCTAGAAAAATAGAGCCCGCTCAGGAAGA        |
| 176861_8776181_HIV2-Con2A_1_40 | 4641 | 4761 | AACATGAAAAATATCATAGCAATGTAAAAGAACTATCCCATAAATTTGGAATATCCCAAACTAGTGGCAAGCAAAATAGTAACACATGTGCGCAATGTCAACAGAAAGGAGGCTATAC         |
| 176861_8776181_HIV2-Con2A_1_41 | 4760 | 4880 | CATGGGCAAGTAAATGCAGAATTAGGCACCTTGGCAAAATGGACTGCACACACTTAGAAGGAAAAATCATTATAGTAGCAGTACATGTTGCAAGTGGATTTATAGAAGCAGAAGTCATCCCA     |
| 176861_8776181_HIV2-Con2A_1_42 | 4879 | 4999 | ACAGGAATCAGGAAGGCAACAGACACTCTTCCTATTAAAACTGGCCAGTAGGTGGCCAAATAACACACTTGACACAGATAATGTTGCCAACTTCACTTCACAGGAAGTGAAGATGGTAGC       |



|                                      |       |       |                                                                                                                                 |
|--------------------------------------|-------|-------|---------------------------------------------------------------------------------------------------------------------------------|
| 176861_8776181_HIV2-Con2A_1_43       | 4998  | 5118  | CATGGTGGGTAGGTATAGAACAACTCTTTGGAGTACCTTACAATCCACAAGCCAAGGAGTAGTAGAAGCAATGAATCACCACCTAAAAAATCAGATAAGTAGAATTAGAGAGCAGGCCAA        |
| 176861_8776181_HIV2-Con2A_1_44       | 5117  | 5237  | AATACAGTAGAAACAATAGTACTAATGGCAGTTCAATTGCATGAATTTTAAAGAGAGGGGAGGAATAGGGGATATGACCCACAGCAGAAAGACTTAATCAATATGATCACCCACAGAAACAAGAA   |
| 176861_8776181_HIV2-Con2A_1_45       | 5236  | 5356  | ATATACAATTCTCCCAAGAAAAAATTCAAAATTTAAAGAAATTTCCGGTGCTATTTCAGAGAAGGCAGACTCAGCTGTGGAAAGGACCTGGGAGCACTGTGGGAAGGAGCAGGCAGT           |
| 176861_8776181_HIV2-Con2A_1_46       | 5355  | 5475  | TCAATAGTCAAGGTAGGGACAGACATAAAAGTAGTACCAAGAAAGGAAAGCCAAAGTATCATCAGAGACTATGGAGGAAGGCCAAGAGCTGGATAGTGTGTTCCCACTTGGAGGGTGCCAGGGGAGG |
| 176861_8776181_HIV2-Con2A_1_47       | 5474  | 5594  | GATGGAGAAGTGGCATAGCCTTGTCAAGTATCTAAAATACAGAACAAAGATCTAGAAAAGGTGTGCTATGTTCCTCCCACTAAGGTGGGATGGGCATGGTGGACTTGCAGCAGGGTAAAT        |
| 176861_8776181_HIV2-Con2A_1_48       | 5593  | 5713  | TATTTCCCATTTAAAGGAAAAAGTCATCTAGAGATACAGGCATATTGGAACCTAACCACAGAAAAAGGATGGCTCTCCTCTTATGCAGTAAAGAATAAATTTGGTATACAGAAAAGTTCTGGGA    |
| 176861_8776181_HIV2-Con2A_1_49       | 5712  | 5832  | ACAGATGTTACCCGAGACTGTGCAGACTCCCTAATAACATAGCAGCTTATTTCTCTTGCTTTACGGCAGGTGAAGTAAAGAAGCCATCAGAGGGGAAAAGTTATTGTCTCTGTCGAATTAT       |
| 176861_8776181_HIV2-Con2A_1_50       | 5831  | 5951  | TCCCCAAGCCCAATAATCCCAGGTACCGTCACTTCAATTTCTGGCCTTAGTGGTAGTGCAACAAAAATGACAGACCCACAGAGAAACAGTACCACCAGGAAACAGTGGCGAAGAGACTATCG      |
| 176861_8776181_HIV2-Con2A_1_51       | 5950  | 6070  | GGAGAGGCCTTCGCGTGGCTAGACAGGACAGTAGAAGCCATAAACAGAGAGGCAGTGAATCACCTGCCCCGGGAGCTTATTTCCAGGTGTGGCAAAGGTCTCTGGAGATACTGGCATGAT        |
| 176861_8776181_HIV2-Con2A_1_52       | 6069  | 6189  | TGAACAAGGGGATGTCACCAAGTTACACAAAGTATAGATATTTGTGCTTAAATGCAGAAAGCTATGTTTCATACATTTTAAAGAGGGGTGCACCTTGCCTGGGGGGAGGACATGGGCCAGGAGG    |
| 176861_8776181_HIV2-Con2A_1_53       | 6188  | 6308  | GATGGAGACCAGACCTCCCCCTCTCCCTCCAGGCTAGTCTAATGATCAAGCACCAACAGAGTTTCCCCCGAGGATGGGACCCCAACGAGGGAGGCTCAGGGGATGATGGGTAAAT             |
| 176861_8776181_HIV2-Con2A_1_54       | 6307  | 6427  | TAGAAATCCTGAGAGAAATAAAAGAAGAAGCTTTAAAGCATTTTGACCCCTCGCTTGCTAATTGTCTCTTGGCAACTATATCTATACTAGACATGGAGACACCCCTGAAGGCCAGAGAGC        |
| 176861_8776181_HIV2-Con2A_1_55       | 6426  | 6546  | CTCATTAGAGTCTCTACAACAGAGCCCTCTTCATGCACCTTCAGAGCAGGATGTGGCCACTCAAGAATTGGCCAAACAGGGGAGGAAATCTCTCTCAGCTATACCGACCCCTAGAGGCATG       |
| 176861_8776181_HIV2-Con2A_1_56       | 6545  | 6665  | GCAATAACACATGCTATTGTGAAGCAATGCTGTACCATTTGCCAGCTGTGTTTTTAAACAAGGGGCTCGGGATATGTTATGACCCGAAGGGCAGCAGCAAGAAGGACTCCAAGAAAAACTA       |
| 176861_8776181_HIV2-Con2A_1_57       | 6664  | 6784  | AAGGCTCTTCGCTTCTGATGACCAAGTGAGTATGCTGTGGTAGGAATCAGCTGCTTGTTCGCATTTTTACTAGCTAGTCTGCTTAAATATTTGCAACCAATATGTGACTGTGTT              |
| 176861_8776181_HIV2-Con2A_1_58       | 6783  | 6903  | TTCTATGGCATAACCCGCGTGGAGAAATGCATCCATTCCCTCTTTTGTGCAACCAAAAAATAGAGATACTTGGGGAACCATACAGTGCCTTGGCAGACAATGATGATTATCAGGAAATAGCT      |
| 176861_8776181_HIV2-Con2A_1_59       | 6902  | 7022  | TTTAAATGTGACAGAGGCTTTTGATGATGGGATAATACAGTAACAGAACCAAGCAATAGAAGATGTCTGGAATCTATTTGAGACATCAATAAAACCATGTGTCAAATTAACACCTTTATG        |
| 176861_8776181_HIV2-Con2A_1_60       | 7021  | 7141  | GTGTAGCAATGAACGTGTACAAGGAACATGACCACATGGACAGGGAGGACAGACCCCAAAATATCACACAATTATAAATGACACTTCTCCATGCATACGCGCAGACAACCTGCTCAGGAT        |
| 176861_8776181_HIV2-Con2A_1_61       | 7140  | 7260  | TTAGGGGAGGAAGACATGGTCAATTGTTCAGTTCAATATGACAGGATTAGAGAGAGATAAAGAAAAACAGTATAAATGAACATGGTACTCAAAAGATGTGGTTTGTGAACAAATAATACC        |
| 176861_8776181_HIV2-Con2A_1_62       | 7259  | 7379  | CACAACAAAAAGAGCAAAATGTTACATGAACCATTTGCAACACATCAGTCATCAGAGTTCATGTGATAAGCACTATTGGGATGCTATGAGGTTTAGATACTGTGCACCACCGGTTATGC         |
| 176861_8776181_HIV2-Con2A_1_63       | 7378  | 7498  | CCCTGCTAAGATGCAATGATACCAATATTATTCAGGCTTTGAGCCCAATTGCTCTAAGTAGTAGTGTGTACATGCACAAGGATGATGGAAACGCCAAACTTCTACTTGGTTTGGCTTTAATG      |
| 176861_8776181_HIV2-Con2A_1_64       | 7497  | 7617  | GGCACTAGAGCAGAAAAATAGAACATATCTATTGGCATGGTAGAGATAATAGAACTATCATCAGCTTTAAACAAATATTATAATCTCACTATGCATTGTAAGAGGCCAGGAAATAAGACA        |
| 176861_8776181_HIV2-Con2A_1_65       | 7616  | 7736  | AGTTGTACCAATAACACTTATGTGCAGGGTTAATGTTTCACTCCAGGCAGTCATCAATAAAGAACCCAGGCAGCATGGTCTGGTTCAAAGGCAAAATGGAAGGAAGCCATGCAGGAGGT         |
| 176861_8776181_HIV2-Con2A_1_66       | 7735  | 7855  | TGAAGCAAAACCTTGCAAAACATCCCAGGTATAAAGGAACCAATGACACAAAGAAAAATTAACTTTACAGCACCGGAAAAGGCTCAGACCCAGAAGTGGCATACATGTGGACTAAGTCA         |
| 176861_8776181_HIV2-Con2A_1_67       | 7854  | 7974  | AGAGGAGAATTTCTCTACTGCAACATGACCTTGGTTCCTCAATTGGGTAGAAAAACAGGACGAATCAGACACAGCGCAATTTATGCGCGGTGCCATATAAAGGCAAAATTAATACTGGGAT       |
| 176861_8776181_HIV2-Con2A_1_68       | 7973  | 8093  | TAAGGTAGGGAATAATGTATATTTGGCTCCTAGGGAAGGAGAGTTGACCTTGAAGTCAACTCAACAGTACACAGCATTAATGCTAACATTGACGTGGATGAAATCAGACAAATATTACCTTTAG    |
| 176861_8776181_HIV2-Con2A_1_69       | 8092  | 8212  | GTGCAGAGGTGGCAGAACTTATACCGAATTAGAATTTGGGGATTATAAAATGTAGTAAATAAACCACCAATTTGGCTTTCGCACCTACATCAGAGAAAGAAAGTACTCTCTGTCTCAGGGAGACATA |
| 176861_8776181_HIV2-Con2A_1_70       | 8211  | 8331  | AAAAGAGGTGTGTTCTGTCTAGGGTTCTTGGGTTTCTTCGCAACAGCAGGTCTTCAATGGGCCGCGGCTCTTGCAGCTGTCCGGCTCAGTCCCGGACTTTACTGGCCGGGATAGTGCAG         |
| 176861_8776181_HIV2-Con2A_1_71       | 8330  | 8450  | GCAACAGCAACAGCTGTTGGACGTGGTCAAGAGACAACAAGAAATGTGTCAGCTGACCGCTGTGGGGAACAAAAATCTCCAGGCAGAGTCTACTGCTATCAGAAAGTACCTAAAGGACCA        |
| 176861_8776181_HIV2-Con2A_1_72       | 8449  | 8569  | AGGCGCAGCTAAATTTCAAGGATGTGCGTTTAGACAAGTCTGCCACACTGTGCACATGGGTAATGATTCCTTAACACCTGATTGGAAACAATATGACATGGCAGGAATGGGAACAAA           |
| 176861_8776181_HIV2-Con2A_1_73       | 8568  | 8688  | AAAGTCCGCTACCTAGAGGCAAAATATCAGTCAAAGTTTAGAACAGGCACAAATTCAGCAAGAAAAAGAAATATGTATGAAGTACAAAAATTAATAGCTGGGATGTTTTTGGCAACTGGTTTT     |
| 176861_8776181_HIV2-Con2A_1_74       | 8687  | 8807  | TGACTTAACCTCCTGGATCAAGTATATTCAAATATGGAGTTTATATAGTAGTAGGAATAATAGCTTTAAGAATAAGTAATATATGTAGTACAAATGTTAAGTAGACTTAGAAAGGGCTATAG      |
| 176861_8776181_HIV2-Con2A_1_75       | 8806  | 8926  | GGCCTGTTTTCTCTTCCCCCCCCGGTTATATCCAACAGATCCATATCCAAGGACCCGGGAACAGCCAGCCAGAGAGAAGAAACAGAAGAAGACGTTGGAGACAACCGTGGAGACAGATCGT       |
| 176861_8776181_HIV2-Con2A_1_76       | 8925  | 9045  | TGGCCTTGGCCGATAGCATATATACATTTCCGTGATCCGCTGCTGATTCCGCTTTTGACCCGAGTATACAAACATCTGCAGGACTTCAAGGATCTCCCTGACCCCTCCAACCAATC            |
| 176861_8776181_HIV2-Con2A_1_77       | 9044  | 9164  | CTTCCAGAGTCTCCAGAGAACACTGACAGCAATCAGAGACTGGCTGAGACTTAAAGCAGCCTACCTGCAATATGGGTGCGAGTGGATCCAAGAAGCGTTCCAGGCCTTCGCGAGGGCTAC        |
| 176861_8776181_HIV2-Con2A_1_78       | 9163  | 9283  | CGAGAGAGACTCTTGCAGCGCGTGGAGGGGCTTGTGGGGGCATTGGGACGAATCGGGAGGGGAATACTCGCAGTCCCAAGAAGGATCAGCAGGGGAGCAGAAATCGCCCTCTCTGTGAG         |
| 176861_8776181_HIV2-Con2A_1_79       | 9282  | 9402  | GGGACAGCGGTATCAGCAGGGAGACTTTATGAATACCCCATGGAGAACCACAGCAGCAGAGAAGGAGAGAAAAATTTATACAAGCAACAAAAATATGGATGATGTAGATTTCAGATGATGATGA    |
| 176861_8776181_HIV2-Con2A_1_80       | 9401  | 9521  | ACCTAGTAGGAGTCTCTGTGCACACCAAGAGTACCACTAAGAGCAATGACATATAAATTGGCAGTAGATATGTGCACATTTTATAAAGAAAAAGGGGGACTGGAAGGGATGTTTTACAGTG       |
| 176861_8776181_HIV2-Con2A_1_81       | 9520  | 9640  | GAGAGAAGACATAGAATCCTAGACATATACTTAGAAAAGGAAGAAGGGATAATTCCAGATTGGCAGAAATATACTCATGGGCCAGGAGTAAGATACCCAATGTCTTTGGGTGGCTATGG         |
| 176861_8776181_HIV2-Con2A_1_82       | 9639  | 9759  | GAACTAGTACCAGTAGATGTCCCACAAGAGGGGGAGGACGATGAGACTCACTGTCTTAATACCCAGCACAACAAAGCAGGTATGATGACCCGATGGGGAACACTAGTCTGGAGGTT            |
| 176861_8776181_HIV2-Con2A_1_83       | 9758  | 9878  | TTGACCCCATGCTGGCCTATGATTACAAGGCCTTTATCTATACCCAGGGAATTTGGGCACAAGCTCAGGCCTGCCAGAAGAAGAGTGAAGGGCAAACTGAAAGCAAGAGGGATACCAT          |
| 176861_8776181_HIV2-Con2A_1_84       | 9877  | 9997  | TGAGCTTAAGACAGGAACAGCATATACTTGGTCAGGACGAAGTAGCTACCTCACTGATGACAGGACTTTCAGAGAGGCTGTATCCAGAGGGCTGTATCCAGAGGGGACATGGGAGGAGCT        |
| 176861_8776181_HIV2-Con2A_1_85       | 9996  | 10116 | TGGTGGGGAACGCCCTCATACTTTCTGTATAAATGTACCCGCTGCTTGCATTGTATTTCAGTCCGCTTCCGGAGAGGCTGGCAGATTGAGCCCTGGGAGGTTCTCTCCAGCACTAGCAGGT       |
| 176861_8776181_HIV2-Con2A_1_86       | 10115 | 10235 | TAGAGCCTGGGTGTTCCCTGCTAGACTCTCACCAGTGTCTGGCCGGCACTGGGCAGACGGCTCCACGCTTGCTTGCTTAAAGACCTCTTAATAAAGCTGCCAGTTAGAAGCAAGTTAAGT        |
| 176861_8776181_HIV2-Con2A_1_87       | 10234 | 10353 | TGTGTGTTCCCATCTCTCTAGTCGCCGCCCTGGTCATTCCGTGTTCCACCTGAGTAAACAAGACCCTGGTCTGTTAGGACCCCTTCTGCTTTGGGAAACCAAGGCAGGAAAAATCCCTAGCA      |
| 176861_8776182_Con2A_6982-7101_1_1   | 1     | 120   | ATGTGACAGAGGCTTTTGTATGCATGGGATAATACAGTAACAGAAACAGCAATAGAAGATGTCTGGAATCTATTGAGACATCAATAAAACCATGTGTCAAATTAACACCTTTATGTGTA         |
| 176861_8776183_Con2A_7249-7371_1_1   | 1     | 120   | ACTGCTCAGGATTAGGGGAGGAAGAGATGGTCAATTGTTCAGTTCAATATGACAGGATTAGAGAGAGATAAGAAAAACAGTATAATGAACATGGTACTCAAAGATGTGGTTTGTGAA           |
| 176861_8776184_Con2A_7451-7570_1_1   | 1     | 120   | TGATAAGCACTATTGGGATGCTATGAGGTTTAGATACTGTGCACCCACCGGGTTATGCCCTGCTAAGATGCAATGATACCAATTAATTCAGGCTTTGAGCCCAATTGCTCTAAAGTAGTAG       |
| 176861_8776185_HIV2B-cgConsensus_1_1 | 0     | 120   | TGGAAGGGATTACTATAGTGAGAGAAGACATAGAATACTAGACACATATCTAGAGAATTAGGAAGGCATTGTGCTGGATGGCAAACTATACACATGGGCCAGGGGTAAAGTATCCAA           |
| 176861_8776185_HIV2B-cgConsensus_1_2 | 119   | 239   | AAGTCCTTTGGTTGGCTGTGGAAAGTACAGTACCAGTAGATATGACAGCAAGCAGGAGGGAGAGGAAACCATTTGTCTGGTGCACCCAGCAGACACTTCTATGGGATGACCCCCAC            |
| 176861_8776185_HIV2B-cgConsensus_1_3 | 238   | 358   | CGGGGAGACCCTTGTCTGGCAGTTTGATCCCTCCTGGCATATGACTATGTGGCCTTCAACAGGTTCCCAAGAAGAGTTTGGGTATCAGTCAGGACTACCAGAGAAGGATGGAAGGCTAG         |
| 176861_8776185_HIV2B-cgConsensus_1_4 | 357   | 477   | GACTAAAAGCAAGAGGAATACCTACAGACTAGGCAGGAAACAGCAGCATAAACAGGAAGTACGCTGACACTGCATAAGAAGGAACTAGCTGACACTGCAGGGACTTTCCAAAGGGGCTG         |

|                                       |      |      |                                                                                                                             |
|---------------------------------------|------|------|-----------------------------------------------------------------------------------------------------------------------------|
| 176861_8776185_HIV2B-cgConsensus_1_5  | 476  | 596  | GTAACATGGGAGGGACATGGGAGGAGTTGGTGGGGAACGCCCATTAATCTCTGTATAAATGTACCCGCTTTTTCATTTGTATTAGTCGCTCTCGGGAGAGGCTGGCAGATTGAGCCCT      |
| 176861_8776185_HIV2B-cgConsensus_1_6  | 595  | 715  | TGGGAGGTTCTCTCCAGCAGCTAGCAGGTAGAGCCTGGGTGTTTCCTGCTAGACTCTCACAGCAGCTTGGCCGGTGCTGGGCAGACGGCTCCACGCTTGCTTGCTTAAACCCCTCTTAATA   |
| 176861_8776185_HIV2B-cgConsensus_1_7  | 714  | 834  | AAAGCTGCCAATTAGAAAGCAAGTTAAGTGTGTGTTCCCATCTCTCTGATCGCCGCTCCACTGAAATAAAGACCCTGGTCTGTGTAGGACCTTCTTGCTTGGGTA                   |
| 176861_8776185_HIV2B-cgConsensus_1_8  | 833  | 953  | AAACCAAGCAGAGAAAATCCCTAGCAGATTGGCGCCCGAACAGGGACTTGAAGAAGAGTGTAGTCTCTCGGAACACGGCTGAGTGAAGGCAGTAAAGGCGCAGGAATCAACCCAGCGG      |
| 176861_8776185_HIV2B-cgConsensus_1_9  | 952  | 1072 | GAGAGCTCCTGTAAAGGCGCAGGCGCGGTACCAGGCAGCGTGAGGAGCGGGAGGAGAAGAGGCCTCCGGGAGGAAAGGTAAGTACTCCAAATTTTGAATTTGTCTACTCTAAAAAGAGGTA   |
| 176861_8776185_HIV2B-cgConsensus_1_10 | 1071 | 1191 | AGGGCATAAGTGGGAGATGGGCGCGAGAGGCTCCGTCTTGTTCAGGGAAGAAAACAGATGAATTAGAAAAAGTTAGGTTACGGCCCGCGCGGAAAGAAAAAGTATATGCTAAAAACATGTAGT |
| 176861_8776185_HIV2B-cgConsensus_1_11 | 1190 | 1310 | TATGGGCAGTGAACGAATTGGACAGATTGGATTAGCAGAGAGCCTGTTGGAATCAAAAGAAAGGATGTCAAAAAATTTCTTACGGTCTTAGCTCCATTAGTACCAACAGGATCAGAAAAAT   |
| 176861_8776185_HIV2B-cgConsensus_1_12 | 1309 | 1429 | TTAAAAAGCCTTTTAAATACTGTCTGCGTCATTTTGGTCTTGCACGCAGAGAAGAAAAGTGAAGATACTGAGGAAGCAAAAAAGATAGCAGACAGACATCTAGCGCGGACACAGAAAAA     |
| 176861_8776185_HIV2B-cgConsensus_1_13 | 1428 | 1548 | AATGCCAGCTACAAGTAAACCAACAGCACCACCTAGCGCGCGAAATTACCCAGTGCAGCAAGTAGCTGGCAATTATGTCCACCTGCGCTAAGCCCCCGAACCTTAAATGCCTGGGTAAA     |
| 176861_8776185_HIV2B-cgConsensus_1_14 | 1547 | 1667 | AATTAGTAGAAGAAAAAGATTTCGGGCGAGAAGTAGTACCAGGATTTTCAGGCACATCAGAAAGGATGCACCCCTTATGATATTAAATCAGATGCTAAATTGTGTAGGAGAATCATCAGGCAG |
| 176861_8776185_HIV2B-cgConsensus_1_15 | 1666 | 1786 | GCCATGCAAAATTATTAGAGAAATAATCAATGAGGAAGCAGCAGATGGTACCAGCAGCAGCCCGATACCAGGCCACTGCCAGCAGGACCTTAGGGAACCTTACGAGGCTCAGATATAGGA    |
| 176861_8776185_HIV2B-cgConsensus_1_16 | 1785 | 1905 | AGGAACCAACCCAGCACAGTAGAGGAACAGATACAGTGGATGTACAGGGCCCAAAATCCTGTCCCAGTAGGAAACATTTATAGAAGATGGATTCAATTAGGACTGCAGAAATGTGTCGGGAT  |
| 176861_8776185_HIV2B-cgConsensus_1_17 | 1904 | 2024 | TGTACAATCCTACCAATATACTAGACATAAAGCAAGGCGCAAAAGAACCTCTCCAAAGCTATGTAGATAGATTCTACAAAAAGCTTACGGGCAGAACAAACAGACCCAGCAGTGAAAAATT   |
| 176861_8776185_HIV2B-cgConsensus_1_18 | 2023 | 2143 | TGGATGACACAAACACTGCTGATTCAAGATGCTAACCCAGATTGCAAGTTAGTACTTAAAGGGCTTGGGAATGAACCCACCTTAGAGGAAATGCTGACAGCCTGCCAAGGGATAGGAGGC    |
| 176861_8776185_HIV2B-cgConsensus_1_19 | 2142 | 2262 | CCAGGGCTAAAGAGCAAGCCTAATGGCTGAAGCCTTTAAAGAAAGCCTTAACACTCAGCATACCCGTTTGTCTGCCGTCAACAAAAGAGCAGGAGGAGGATGCACTGTGGAA            |
| 176861_8776185_HIV2B-cgConsensus_1_20 | 2261 | 2381 | ACTGTGGCAAAGGGGACACACAGCCAGGCAATGCAGGGCCCCCTAGAAGACAGGGATGCTGGAAATGTGGAACACAGGACACATCATGTCAAATGCCAGAAAGACAGGCGGGTTTTT       |
| 176861_8776185_HIV2B-cgConsensus_1_21 | 2380 | 2500 | TTAGGGTTTGGACCCCTGGGGAAGAAGCCTCGCAACTTCCCCATGACCCAAAGTGCTCAGGGGTGACGCCATCTGCAACCCCGATGAACCCAGCAGAGGGCATGACACCTCAGGGGGCG     |
| 176861_8776185_HIV2B-cgConsensus_1_22 | 2499 | 2619 | GACACCATCTGCGCCCCCTGCAGATCCAGCAGTGGAGATGCTGAAAAACTACATGCAGCTGGGGAAGCAGCAGAGAGAGAGCCGAGAGAGACCTTACAAGGAGGTGACAGAGGATTTGCT    |
| 176861_8776185_HIV2B-cgConsensus_1_23 | 2618 | 2738 | TGCACCTCAATTCTCTCTTTGGAGAAGACAGTAGTCAAAGCATATATCGAGGGTCAGCCAGTAGAAGTATTACTAGACACAGGGGCTGATGACTCAATAGTAGCAGGAATAGAATTAGG     |
| 176861_8776185_HIV2B-cgConsensus_1_24 | 2737 | 2857 | GTAGCAATTACACCCCAAAATAGTAGGAGGAATAGGAGGATTCATAAATACCAAAGAATACAAAATGTAGAAATAGAAGTAGTAGGAAAAAGAGTAAGAGCAACTATAATGACAGGAG      |
| 176861_8776185_HIV2B-cgConsensus_1_25 | 2856 | 2976 | GACACCCCAATAAACATTTTGGGAGAAATATTTTAAATACCTTAGGCATGACTCTAAATTTCCCAAGTGGCAAAAATAGAACCAGTAAAGTCAAGTTAAACCTGGAAAGATGGACCA       |
| 176861_8776185_HIV2B-cgConsensus_1_26 | 2975 | 3095 | AAAAATCAGACAAATGGCCTCTATCTAAAGAAAAGATACTAGCCCTCAAAGAAATCTGTGAAAAATGGAAAAGGAGGACAACTAGAGAAGACACCCCTACTAATCCATAACACACACC      |
| 176861_8776185_HIV2B-cgConsensus_1_27 | 3094 | 3214 | CCACCTTTGGCATAAAGAGAAGGACAAAAACAATGGAGAATGCTAATAGATTTCAGAGAATTAAACAAGGTAAACCAAGCTTTACAGAAGTCCAATGGGTATTCCCAACCCGGGAG        |
| 176861_8776185_HIV2B-cgConsensus_1_28 | 3213 | 3333 | GGGCTGGCAGAAAAAAGGAGAATAACAGTACTAGATGTAGGAGATGCCTACTTTCAGTATCCCAGTATAGTCCAGACTTCAGACAAATATACAGCATTCACCTTGCCATCAGTAATAATGCA  |
| 176861_8776185_HIV2B-cgConsensus_1_29 | 3332 | 3452 | AGAGCCAGGAAAAAGATACATTTTAAAGTCTTACCACAAGGATGGAAGGGATCCCCAGCAATTTTTCATACTCCATGAGGAAGGTACTAGACCCCTTCAGAAAAAGCCAAACATGATGT     |
| 176861_8776185_HIV2B-cgConsensus_1_30 | 3451 | 3571 | TCATATAATCCAGTACATGGATGACATCCTTGTAGCAAGTGACAGAGATCTTAGAGCATGACAGGCTAGTGTCTCAACTAAAAGAGCTATTAAATGACATGGGATTTCTTACCCAG        |
| 176861_8776185_HIV2B-cgConsensus_1_31 | 3570 | 3690 | GAAAGAAAAGTTTCAAAAAGACCCCTCCATTCAAATGGATGGGTATTATAGCTCTGCGGCAAAAAGTGGAAATGCAAAAAATACAAGTCCAGCAATGAGTATTTGGACAGTAATGACATT    |
| 176861_8776185_HIV2B-cgConsensus_1_32 | 3689 | 3809 | TCAGAACTAGTGGGAGTACTAACTGGGAGCTCAACTTTTTCTGGAATTAAAGACAAGGCACATATGCAAACTAATCAGGGGAAAGATGACCCCTAACAGAAGAAGTACAGTGGACAGA      |
| 176861_8776185_HIV2B-cgConsensus_1_33 | 3808 | 3928 | AATTAGCAGAGGCAGAGTTGCAGGAAAAATAAATCATCTAGAACAGGAACAGGAAGGATCCTACTACAAAGAAAGGGGTACCTCTAGAAAGCAACAGTGCAGAAAAACCTTAGCAAAATCAGT |
| 176861_8776185_HIV2B-cgConsensus_1_34 | 3927 | 4047 | TGGACATACAAAAATCTCAGGAGATAGAAATCTTAAAGATGAGAAATATGCAAGGTTAAAAACCCACCAACCAATGGAGTAAAGTACTGGCACATGTAGTCTCAGAAAAATAGGAAAA      |
| 176861_8776185_HIV2B-cgConsensus_1_35 | 4046 | 4166 | AGAAGCACTAGTCATCTGGGGAGAAATACCAATGTTCCATCTGCCAGTAGAAGAGAGACATGGGACCAGTGGTGGACAGATTACTGGCAAGTAACCTGGATCCCAGAATGGGATTTTGT     |
| 176861_8776185_HIV2B-cgConsensus_1_36 | 4165 | 4285 | TCTCAACCCACCATTAGTAGACTAGCCTACAACTAGTCAAAGACCCCTAGAAGAGGTAGAAACCTACTACACAGATGGGTCTCTGCAACAGAGCCTCAAAGGAAGGAAAGCAGGAT        |
| 176861_8776185_HIV2B-cgConsensus_1_37 | 4284 | 4404 | TATGTCACAGACAGGGGAAAAAGATAAGGTTAAAGTGTAGAGCAGACAACAAATCAACAAGCAGAACTTGAAGCATTTGCACTAGCATTACAGGATTACAGGCCAACAGTCAACATCATA    |
| 176861_8776185_HIV2B-cgConsensus_1_38 | 4403 | 4523 | AGTAGATTCAAAATATGTATGGGAATATAGCTGGACAGCCAAACAGAAACAGAAATCACCAATAGTAAGATAAATAAATTTGAAGAAATGATCAAAAAGGAAGCAATATATGTAGGATGGGT  |
| 176861_8776185_HIV2B-cgConsensus_1_39 | 4522 | 4642 | TGCCAGCTCACAAAGGACTAGGTGGTAATCAGGAAGTAGACCCTAGTAAGTCAAGGAATTAGACAGGTTCTATTCTAGAAAAATAGAACAGCTCAAGAAGAATATGAAAAATATC         |
| 176861_8776185_HIV2B-cgConsensus_1_40 | 4641 | 4761 | CATGGCAATGTAAAGAACTAGTTCATAAAATTTGGAATTCACAAATTAGTGGCAAAACAAATAGTAATTTCTGTGATAAATGCCAACAAAAGGAGAGGTATTATGAGCAGGTAAAT        |
| 176861_8776185_HIV2B-cgConsensus_1_41 | 4760 | 4880 | TGCAGAACTAGGGACATGGCAGATGGACTGTACACATTTAGAAGGAAAAATCATATAGTGGCAGTCCATGTAGCCAGTGGGTTTATAGAAGCAGAAGTAATACCCCAAGAAACAGGAAAG    |
| 176861_8776185_HIV2B-cgConsensus_1_42 | 4879 | 4999 | GACAGACAGCTCTCTCTCTGTTAAAGTTGGCCAGCAGATGGCCTATCACACACCTGCACACAGACAATGGTGCCAACTTCACCTCACAAGATGTGAAGATGGTAGCCTGGTGGGTAGGAA    |
| 176861_8776185_HIV2B-cgConsensus_1_43 | 4998 | 5118 | ATAGAACAAACCTTTTGAGTACCCTATAACCCACAAAGTCAGGGAGTAGTAGAAGCAATGAACCATCATCTAAAAAATCAAATAGATAGAATCAGAGACCAGGCATGATCAATAGAGACA    |
| 176861_8776185_HIV2B-cgConsensus_1_44 | 5117 | 5237 | AGTTGTAATAATGGCAGCTCACTGCATGAATTTTAAAGAAAGGGGAGGAATAGGGGATATGACCCCTGCAGAGAGACTAGTTAAACATGATAACACAGAACAAAGAAATACAATTCTTCCA   |
| 176861_8776185_HIV2B-cgConsensus_1_45 | 5236 | 5356 | AAGCAAAAAATTTAAATTTCAAATTTCCAGGTCTATTACAGAGAAGGCAGAGATCAACTCTGGAAGGGACCTGGTGAGCTATTGTGGAAGGGGAAGGAGCAGTCATCATAAAGGTAG       |
| 176861_8776185_HIV2B-cgConsensus_1_46 | 5355 | 5475 | TGGACATACAAAAATCTCAGGAGATAGAAATCTTAAAGATGAGAAATATGCAAGGTTAAAAACCCACCAACCAATGGAGTAAAGTACTGGCACATGTAGTCTCAGAAAAATAGGAAAA      |
| 176861_8776185_HIV2B-cgConsensus_1_47 | 5474 | 5594 | ACAGTCTGGTCAAGTACCTGAAGCATAGAACAAGAGATTGCAACAGGTCTCTTATGTCTCCCCACCACAAGGTAGGATGGGCTTGGTGGACTTGCAGTAGAGTAATATCCCCCTAAAAAG    |
| 176861_8776185_HIV2B-cgConsensus_1_48 | 5593 | 5713 | GAAAGAGCATATCTAGAGGTCCAAGGATATTGGAATCTGACCCCGGAAAGGGGATTCTTGAGTTCTTATGCTGTAAGACTAACATGGTATAAAAGGAGCTTTTATACAGATGTAAACCT     |
| 176861_8776185_HIV2B-cgConsensus_1_49 | 5712 | 5832 | TGATGTGGCAGACCAGCTACTGCATGGGTCTTATTCTCTTGCTTTACAGCCAATGAAGTAAGGAGAGCCATCAGGGGAGAAAAAGATATTGTCTTACTGCAACTATCCATCAGCTCACGA    |
| 176861_8776185_HIV2B-cgConsensus_1_50 | 5831 | 5951 | AAGGGCAGGTACCAAGTTTACAGTTTCTAGCCTTAAAGATTGTACAAGAAGAAAAATGGATCCCAAGGAGAGAGTGGCACCAGGAAACAGCGACGAAGAAACAAATAGGAGAGGCATT      |
| 176861_8776185_HIV2B-cgConsensus_1_51 | 5950 | 6070 | CGAATGGCTAGAAAGAACAAATACAGAGCTCAACAGGGAAGCAGTCAACCATTTGCCCCGAGAACTCATTTTCCAGGTCTGGCAAAGGCTCTGGGCATATTGGCGTGAGGAACAGGGCAT    |
| 176861_8776185_HIV2B-cgConsensus_1_52 | 6069 | 6189 | TGTCAAATTAGCTACACCAAATATAGATACTTGTTCTTAATGCAAAAAGCAATGTTTGTGCAATTTTACAAAGGGCTGTACATGCCTGCGGAGGGGCCATTGGGCCAGGGGGATGGAGACCAG |
| 176861_8776185_HIV2B-cgConsensus_1_53 | 6188 | 6308 | GGACCTCCTCCTCTCCCTCCCGCAGGCTAGCCTAATGGCAGAGCAGCCACAGACTCCTCCAGAGAAATGAGGACCCACAGAGAGGCCATGGGAAGAGTGGGTAGAGGACGCTCTCG        |
| 176861_8776185_HIV2B-cgConsensus_1_54 | 6307 | 6427 | GAGAAATAAAGCAAGAAGCCCTTAAAGCATTTTGTATCCCGCTTGCTAACTCGCTTGGTAACCTTTATCTACAGTAGGCATGGAGATACCCCTTGGAGAGAGAGAGACTCATTTAAATC     |
| 176861_8776185_HIV2B-cgConsensus_1_55 | 6426 | 6546 | CCTCCAACGAGCGCTCTTCTCCACTTCAGAGGCGGTTGTCAACACTCAAGGATTGGACAACAGGGGGAGGAAATCCTCTCTCAGCTATACCGCCCTCTTAGGCATGCAATAATAAAT       |
| 176861_8776185_HIV2B-cgConsensus_1_56 | 6545 | 6665 | TGCTACTGTAAAGAAATGCTGTCTACCATTGCCAGCTTGTGTTTCTTAAAAAGGCGCTTGGGATATGTTATGACCGCTCGAGAAAAAGATCTTCAAAAAGGGCTAAGGCTACTGCATCTTCT  |

|                                       |       |                                                                                                                                     |
|---------------------------------------|-------|-------------------------------------------------------------------------------------------------------------------------------------|
| 176861_8776185_HIV2B-cgConsensus_1_57 | 6664  | 6784 TGCATCAGACAAGTGAGTATGGCACATATTAGCAATCACCTGCTTATTGCGCTCCTGCTTATAAGTGTCTATGGGTTTTTGTGTAAACAATATGTCACTGTCTTCTATGGCATACCCGCA       |
| 176861_8776185_HIV2B-cgConsensus_1_58 | 6783  | 6903 ATGGAGGAATGCAACAGTTCCCTCTTTTGTGCAACCAAAACAGAGATACCTGGGGAACTATACAGTGCCTCCAGACAATGATGATTATACCGAAATCGCTCTAAATGTAACAGAGGC          |
| 176861_8776185_HIV2B-cgConsensus_1_59 | 6902  | 7022 CTTTGTGATGCATGGAATAATACAGTAACAGAACAGGCAGTAGAGGATGTGTGGAGTCTTTTGTGACCTCAATAAAACCATGTGTCAAGCTAACACCACTATGTGTGGCAATGAACTGTA       |
| 176861_8776185_HIV2B-cgConsensus_1_60 | 7021  | 7141 AGTAAACTGAGACAAACCTAACAGGAAGCAGTAGTACCACCATACCCCCACTACTACCCTACTCATAAGCTTAAATAAGTATTATAATTTAAACAATACACTGTAGAAGGCCAGGAAACAAGACGT |
| 176861_8776185_HIV2B-cgConsensus_1_61 | 7140  | 7260 AATAGGACTAGAAAAAATGGTTGACTGTCAATTAAATATGACAGGACTAAGAAGAGATGAGAAAAACAATATAATGACACCTGGTACTCACAAGATTTAGTGTGTGAAAAATACCAGGAA       |
| 176861_8776185_HIV2B-cgConsensus_1_62 | 7259  | 7379 AGAATAATGACAGCAGATGCTATATGAAAACCTGTAATACATCAGTTATCCAAGAGTCATGTGACAAACATTATTGGGATAGCTTAAGATTTAGGTACTGTGTCTCCCCAGGATTTGCTT       |
| 176861_8776185_HIV2B-cgConsensus_1_63 | 7378  | 7498 TTGCTAAGATGTAATGATACCAACTATTTCAGGCTTTATGCCCACTGTAGTAAAGTAGTAGTATCCTCTTGACAAAGAAATGATGGAACACAGACCTCTACATGGTTTGGCTTCAATGGT       |
| 176861_8776185_HIV2B-cgConsensus_1_64 | 7497  | 7617 TACAAGGGCAGAAAAATAGGACATATATATATTGGCATGGTAGAGATAATAGGACTATCATAAGCTTAAATAAGTATTATAATTTAAACAATACACTGTAGAAGGCCAGGAAACAAGACGT      |
| 176861_8776185_HIV2B-cgConsensus_1_65 | 7616  | 7736 TTGTACCAATAACAATCATGTTCAGGGCTAGTGTTCATTTCACAGCCTATCAATAAAAGACCCAGACAAAGCTTGGTGTCTGGTTTAAAGGAACTTGCAGACAGAACCCATAAAGGAGGTGAAGG  |
| 176861_8776185_HIV2B-cgConsensus_1_66 | 7735  | 7855 GAGACCATTTATAAAACATCCCAGGTATAAAGGAACAAAAATATCACAAGAGATAAAATTTGGCAGAGCCCGCAGCAGGTTTCAGATCCAGAAGTAACATACATGTGGACTAACTGCAGAGGA    |
| 176861_8776185_HIV2B-cgConsensus_1_67 | 7854  | 7974 AGAATTCTTCTACTGTAATATGACTTGGTTTTTAACTGGGTAGAAAACAGAACTGGTACAACTAAGAGAAATTATGTGCCGTGCCACATCAGACAGATAATCAACACGTGGCAACAAGGT       |
| 176861_8776185_HIV2B-cgConsensus_1_68 | 7973  | 8093 TAGGAAAAAATGTATATTTGCTCCAAGGGAAGGTGAGCTCACCTGTAATTCCTACTGTACCAGCCTCATAGCCAACATTGACTGGATTGATAACAGGAACCATACCAATATTACCATGA        |
| 176861_8776185_HIV2B-cgConsensus_1_69 | 8092  | 8212 AGTGCAGAAAGTGGCAGAACTGTATAGATTGGAATTGGGGGACTACAAATTAGTAGAAAATAACACCAATTGGCTTTGCACCTACAAAATGTAAAAAGATATTCTCAGCGACACCGAGGAAT     |
| 176861_8776185_HIV2B-cgConsensus_1_70 | 8211  | 8331 TAAAAGAGGTGTATTTGTGCTAGGGTTCTTGGGATTTCTTGCAACGGCAGGTTCTGCAATGGGCGCAGCGTCTTGACGCTGTTCAGTCTCAGTCCCGGACTTTACTGGCTGGGATAGTGCA      |
| 176861_8776185_HIV2B-cgConsensus_1_71 | 8330  | 8450 AGCAGCAGCAACAGCTGTGTGACGTGGTCAAAAGACAACAGGAACCTGTGCGGTGACCGTCTGGGGGACGAAAAACCTCCAGACAAGAGTCACTGCCATCGAGAAATACCTAAAGGACC        |
| 176861_8776185_HIV2B-cgConsensus_1_72 | 8449  | 8569 CAGGCACAACATAAATTCATGGGGATGTGCTTTTAGACAGGTCTGCCACACTACTGTACCATTGGCCAAATGAAACTCTCACACCAAACTGGGACAACATGACATGGCAACAATGGGAAAAA     |
| 176861_8776185_HIV2B-cgConsensus_1_73 | 8568  | 8688 ACAAGTCCACTACTTGGATGCAAAATATAACAGAACTATTAGAAGAGGCACAGATACAACAAGAAAAGAACATGTATGAATTACAGAAATTAAATAGCTGGGATGTTTTTGGTAATTGGTT      |
| 176861_8776185_HIV2B-cgConsensus_1_74 | 8687  | 8807 TTGACTTCACCTCCTGGATAAAATATATCAAGTTAGGACTATATGTAGTAGTAGGATTAATAGTGTTAAGAATAGTAATATACATTGTACAGATGCTAGCAAGACTTAGGAAGGGCTATA       |
| 176861_8776185_HIV2B-cgConsensus_1_75 | 8806  | 8926 AGGCCAGTATTCTCTCCCTCCCTCTTATATTCAACAGATCCCTATCCACAAGGACCGGGGACAGCCAGCCAACGAAGAAACAGAGAAGGAGGTGGAAACGACGGGGGCTACAGATCT          |
| 176861_8776185_HIV2B-cgConsensus_1_76 | 8925  | 9045 TTGGCCCTGGCAGATAGAATACATTCATTTCTGTATTCGCCAGCTGAGGAACCTCTTGATTTGGCTATACAACGGCTGCAGAACCTTACTATTGAAGACCTTCCAATCTCCAACCACT         |
| 176861_8776185_HIV2B-cgConsensus_1_77 | 9044  | 9164 TACTCCAACCACTCAGGCTTCCACTTGCATACCTCCAGTATGGGATCAGCTGGTTCCAAGAAGCAATCCAAGCAGCAGCGAGGGCTCGGGGAGAGACTCTTGCGAGCGCGGGGAGGGCCT       |
| 176861_8776185_HIV2B-cgConsensus_1_78 | 9163  | 9283 TTATGGGAGGCTCTCAGAAGAGCGGCGAGAGCAATCATCGCGATCCCCAGGAGGATCAGACAAGGACTTGAAGTTCGCCCTCTTGTGAGGGACAAAATGCCCCAGGAGCAGAAGGGGGAGG      |
| 176861_8776185_HIV2B-cgConsensus_1_79 | 9282  | 9402 GGCAACAAGATATAGATGATAGTGATGAGGATGATGAAGTGGGAGTCTATGTAAGACCCAATATGCCACTGAGACCAATGACATACAAATTTGGCAATAGACATGTCTCATTTTATAAAAG      |
| 176861_8776185_HIV2B-cgConsensus_1_80 | 9401  | 9521 GAAAAGGGGGGACTGGAAGGGATTTTTTATAGTGAGAGAAGACATAGAATATTAGACACATACTTAGAGAATGAGGAAGGCATTGTATCTGGATGGCAGAACTATACACATGGGCCAGGG       |
| 176861_8776185_HIV2B-cgConsensus_1_81 | 9520  | 9640 GATAAGATATCCAAGTCTTTTGGCTGGCTGTGGAAGCTAGTACCAGTAGATGTACCAGAAGAAGAGGAGGAAGAGGAGACCCATTGTCTGGTGCACCCAGCAGACAGACCTCTTCATGGGA      |
| 176861_8776185_HIV2B-cgConsensus_1_82 | 9639  | 9759 ATGACCCCCATGGGGAGACCTTTGTCTGGCAGTTTGATTCCCTCCTGGCATATGACTATGTGGCCTTCAACAGGTTCCAGAGAGTTTGGGTATCAGTCAGGGCTACAGAGAAAGAGT          |
| 176861_8776185_HIV2B-cgConsensus_1_83 | 9758  | 9878 TGGAAAGGCTAGACTAAAAGCAAGAGGAATACCTACAGATTAGGCAGGAAACAGCAGCATAAAGAGGAACTAGCTGACACTGCATAAGAAGAACTAGCTGACACTGCAGGGACTTTCCAA       |
| 176861_8776185_HIV2B-cgConsensus_1_84 | 9877  | 9997 AAAGGGGCTGTAACATGGGAGGGACATGGGAGGAGTTGGTGGGGAACGCCCATTAATCTCTGTATAAAATGTACCCGCTTTTTCATTGTATTTCAGTCGCTCTGCGGAGAGGCTGGCAGA       |
| 176861_8776185_HIV2B-cgConsensus_1_85 | 9996  | 10116 ATCGAGCCCTGGGAGGTTCTCTCCAGCACTAGCAGGTAGAGCCTGGGTGTTCCCTGCTAGACTCTCACCAGCACTTGGCCGGTGTCTGGGCAGACGGCTCCACGCTTGCTTTGCTTAAACC     |
| 176861_8776185_HIV2B-cgConsensus_1_86 | 10115 | 10235 CCTCTTAATAAACTGCCAATTAGAAGCAAGTTAAGTGTGTGTTCCCATCTCTCCTAGTCGCGCCTGGTCACTCGGTGCTCCACTGAAATAAAGACCCTGGTCTGTTAGGACCTTTCTG        |

**Table S2A. Consensus sequence identity**

| HIV Reads              |        | SMART  | SMART+xGen | SMART_dup removed | SMART+xGen_dup removed |
|------------------------|--------|--------|------------|-------------------|------------------------|
| <b>PBS5635</b>         |        |        |            |                   |                        |
| SMART                  | 12653  |        | 99.90%     | 99.90%            | 99.90%                 |
| SMART+xGen             | 522043 | 99.90% |            | 99.80%            | 99.90%                 |
| SMART_dup removed      | 12155  | 99.90% | 99.80%     |                   | 99.80%                 |
| SMART+xGen_dup removed | 242912 | 99.90% | 99.90%     | 99.80%            |                        |
| <b>P406</b>            |        |        |            |                   |                        |
| SMART                  | 4676   |        | 99.10%     | 99.90%            | 99.70%                 |
| SMART+xGen             | 629912 | 99.10% |            | 99.10%            | 99.30%                 |
| SMART_dup removed      | 4614   | 99.90% | 99.10%     |                   | 99.70%                 |
| SMART+xGen_dup removed | 531814 | 99.70% | 99.30%     | 99.70%            |                        |
| <b>PBS1189</b>         |        |        |            |                   |                        |
| SMART                  | 2260   |        | 99.80%     | 99.70%            | 99.70%                 |
| SMART+xGen             | 463644 | 99.80% |            | 99.70%            | 99.80%                 |
| SMART_dup removed      | 2111   | 99.70% | 99.70%     |                   | 99.80%                 |
| SMART+xGen_dup removed | 98446  | 99.70% | 99.80%     | 99.80%            |                        |
| <b>50</b>              |        |        |            |                   |                        |
| SMART                  | 1731   |        | 98.90%     | 99.40%            | 99.20%                 |
| SMART+xGen             | 218072 | 98.90% |            | 99.30%            | 99.50%                 |
| SMART_dup removed      | 1693   | 99.40% | 99.30%     |                   | 99.70%                 |
| SMART+xGen_dup removed | 92015  | 99.20% | 99.50%     | 99.70%            |                        |
| <b>87-2580</b>         |        |        |            |                   |                        |
| SMART                  | 5741   |        | 99.70%     | 99.80%            | 99.70%                 |
| SMART+xGen             | 221335 | 99.70% |            | 99.70%            | 99.80%                 |
| SMART_dup removed      | 5565   | 99.80% | 99.70%     |                   | 99.80%                 |
| SMART+xGen_dup removed | 190384 | 99.70% | 99.80%     | 99.80%            |                        |

Table S2B. Minor Variant analysis

|                        | % genome coverage | Total # minor variants | SMART                                 | SMART+xGen                            | SMART_dup removed                     | SMART+xGen_dup removed |
|------------------------|-------------------|------------------------|---------------------------------------|---------------------------------------|---------------------------------------|------------------------|
| PBS5635                |                   |                        |                                       |                                       |                                       |                        |
| SMART                  | 95                | 103                    | 71, 74.0% (71/96), 79.8% (71/89)      | 96, 95.0%(95/101), 97.9% (95/97)      |                                       |                        |
| SMART+xGen             | 99                | 89                     |                                       |                                       | 85, 95.5% (85/89), 92.4% (85/92)      |                        |
| SMART_dup removed      | 95                | 97                     |                                       |                                       | 79, 78.2% (79/101), 84.0% (79/94)     |                        |
| SMART+xGen_dup removed | 99                | 92                     |                                       |                                       |                                       |                        |
| P406                   |                   |                        |                                       |                                       |                                       |                        |
| SMART                  | 98                | 210                    | 122, 54.2% (122/225), 64.2% (122/190) | 181, 92.3% (181/196), 98.4% (181/184) |                                       |                        |
| SMART+xGen             | 100               | 190                    |                                       |                                       | 186, 96.9% (186/192), 87.3% (186/213) |                        |
| SMART_dup removed      | 98                | 184                    |                                       |                                       | 152, 79.2% (159/192), 71.4% (152/213) |                        |
| SMART+xGen_dup removed | 100               | 213                    |                                       |                                       |                                       |                        |
| PBS1189                |                   |                        |                                       |                                       |                                       |                        |
| SMART                  | 82                | 31                     | 10, 28.6% (10/35), 33.3% (10/30)      | 27, 90.0% (27/30), 100.0% (27/27)     |                                       |                        |
| SMART+xGen             | 86                | 30                     |                                       |                                       | 20, 95.2% (20/21), 90.9% (20/22)      |                        |
| SMART_dup removed      | 82                | 27                     |                                       |                                       | 8, 30.8% (8/26), 38.1% (8/21)         |                        |
| SMART+xGen_dup removed | 86                | 22                     |                                       |                                       |                                       |                        |
| 50                     |                   |                        |                                       |                                       |                                       |                        |
| SMART                  | 83                | 116                    | 35, 35% (35/100), 53.8% (35/65)       | 106, 80.9% (106/131), 95.5% (106/111) |                                       |                        |
| SMART+xGen             | 83                | 65                     |                                       |                                       | 62, 93.9% (62/66), 91.2% (62/68)      |                        |
| SMART_dup removed      | 83                | 111                    |                                       |                                       | 43, 43% (43/100), 70.5% (43/61)       |                        |
| SMART+xGen_dup removed | 83                | 68                     |                                       |                                       |                                       |                        |
| 87-2580                |                   |                        |                                       |                                       |                                       |                        |
| SMART                  | 96                | 95                     | 68, 55.3% (68/123), 63% (68/108)      | 61, 70.3% (61/86), 82.4% (61/74)      |                                       |                        |
| SMART+xGen             | 96                | 108                    |                                       |                                       | 71, 87.7% (71/81), 75.5% (71/94)      |                        |
| SMART_dup removed      | 96                | 74                     |                                       |                                       | 8, 44.4% (8/18), 57.1% (8/14)         |                        |
| SMART+xGen_dup removed | 96                | 94                     |                                       |                                       |                                       |                        |
